# Supplementary material
Source: publisher site journal article supplement (https://www.spandidos-publications.com/23/downloadSupplementary)
Supplement: Supplementary file 2 [file downloadSupplementary]

## Sheet: LC-MSMS identified proteins
Table SIV. Summary of identified proteins by LC-MS/MS analysis from urine samples. Urinary proteins enriched by either CM10 or IMAC30 protocols were subjected to LC-MS/MS analysis and the resulting Mascot analysis was combined by identified protein. The UniProt/SwissProt accession name, protein name, mass in Da, and classifier of the 1228 entries are listed, together with information such as how …
SP	name	chromatography	Mass	pI	mean Mascot Score	best Mascot Score	mean sequence coverage (%)	highest sequence coverage (%)	mean number of peptides matched	highest number of peptides matched	mean emPAI	total number of peptides matched	times found (total)	number of unique samples found (max=62)	highest expected sequence coverage (%) (max)	ratio sequence coverage observed:expected	WEU0010	WEU0011	WEU0013	WEU0019	WEU0022	WEU0024	WEU0043	WEU0047	WEU0048	WEU0050	WEU0052	WEU0054	WEU0059	WEU0060	WEU0061	WEU0062	WEU0065	WEU0068	WEU0070	WEU0071	WEU0072	WEU0074	WEU0080	WEU0081	WEU0083	WEU0085	WEU0089	WEU0090	WEU0092	WEU0094	WEU0096	WEU0105	WEU0107
1433Z_HUMAN	14-3-3 protein zeta/delta	CM / IMAC	27916	4.73	36	38	15.1	15.1	4.5	5	0.14	9	2	2	43	0.35												5
3BHS7_HUMAN	3 beta-hydroxysteroid dehydrogenase type 7	CM	41358		16	16			1	1	0.09	1	1	1	29
5HT1E_HUMAN	5-hydroxytryptamine receptor 1E	IMAC	42366		18	18			1	1	0.09	1	1	1	9.4
6PGL_HUMAN	6-phosphogluconolactonase	CM	27832	5.7	19	21	4.3	4.3	2	2	0.14	2	2	2	43.1	0.1								2
A16L1_HUMAN	Autophagy-related protein 16-1	CM	68949	6.2	16	16	4.4	4.4	2	2	0.05	2	1	1	14.5	0.3			2
A1AT_HUMAN	Alpha-1-antitrypsin precursor	CM / IMAC	46907	5.37	55	209	10.8185	18.7	9.5	27	0.65	143	43	30	32	0.58							1	27			2			5	4	4	24	6		4	6			1			4		8	5	6	4
A1BG_HUMAN	Alpha-1B-glycoprotein precursor	CM / IMAC	54842	5.58	46	102	9.45625	18.8	6.9	16	0.2	76	24	22	25.5	0.74			4					6					5		4		15			3	5							4	3		4	8	1
A2GL_HUMAN	Leucine-rich alpha-2-glycoprotein precursor	CM / IMAC	38406	6.45	39	90	12.3769	19.9	7.9	14	0.25	63	19	14	39.1	0.51			3												4		14	5									4	5			8
A2MG_HUMAN	Alpha-2-macroglobulin precursor	CM / IMAC	164702	6	24	28	3.1	3.1	5.7	7	0.02	17	3	3	9.1	0.34								7										4
AACT_HUMAN	Alpha-1-antichymotrypsin precursor	CM / IMAC	47821	5.33	56	145	13.4308	22.5	8.4	18	0.26	126	50	32	31.4	0.72			10				2	10		6		4	6	11		6	18	6			9			1		3	8		3	4	7	4	3
ABCA5_HUMAN	ATP-binding cassette sub-family A member 5	IMAC	186508	6.51	17	17	1	1	3	3		3	1	1	4.8	0.21																				3
ABCB7_HUMAN	ATP-binding cassette sub-family B member 7, mitochondrial precursor	CM	82641	9.37	18	18	1.7	1.7	2	2		2	1	1	12.1	0.14
ABCG1_HUMAN	ATP-binding cassette sub-family G member 1	IMAC	76561		27	27			2	2	0.05	2	1	1	5.2
ABHEB_HUMAN	Abhydrolase domain-containing protein 14B	CM	22460	5.94	32	43	14.9333	22.4	4	6	0.38	20	7	6	53.4	0.42														3			5														4
ACBP_HUMAN	Acyl-CoA-binding protein	CM	10044	6.12	24	27	11.5	11.5	1.5	2	0.69	3	2	2	119.5	0.1												1					2
ACD10_HUMAN	Acyl-CoA dehydrogenase family member 10	CM / IMAC	119974	8.33	16	16	3.1	3.1	6.5	9	0.03	13	2	2	5.8	0.53
ACK1_HUMAN	Activated CDC42 kinase 1	IMAC	115353		16	16			1	1	0.03	1	1	1	3.5					1
ACLY_HUMAN	ATP-citrate synthase	CM	121751	6.95	30	30	1.4	1.4	2	2		2	1	1	5.3	0.26													2
ACTA_HUMAN	Actin, aortic smooth muscle	CM / IMAC	42408	5.23	41	97	11.1833	14.6	8	21	0.27	72	13	12	35.4	0.41								21						4			4	5		10									3			6
ACTB_HUMAN	Actin, cytoplasmic 1	CM / IMAC	42079	5.29	48	97	16.37	33.6	11.3	23	0.3	136	16	12	35.6	0.94								23				11		4				13		10									3		21
ACTC_HUMAN	Actin, alpha cardiac muscle 1	CM / IMAC	42361	5.23	43	97	16.66	33.2	9.5	21	0.27	124	18	14	35.4	0.94								21				10		4			8	5		10									3		20	7
ACTG_HUMAN	Actin, cytoplasmic 2	CM / IMAC	42135	5.31	47	97	16.3364	33.6	11.3	23	0.09	136	17	13	35.6	0.94								23				11		4				13		10									3		21	7
ACTH_HUMAN	Actin, gamma-enteric smooth muscle	CM / IMAC	42276	5.31	44	97	13.0571	22.9	8.8	21	0.14	70	11	11	35.5	0.65								21				10		4				5		10									3			6
ACTK_HUMAN	Kappa-actin	CM / IMAC	42358	5.91	30	48	9.1	14.7	2.5	4	0.09	10	11	10	35.4	0.42													3				2	4		3							1		3		3	3
ACTN1_HUMAN	Alpha-actinin-1	CM / IMAC	103627	5.25	29	38	5	7.6	3.8	7	0.04	15	6	4	9.6	0.79	4																	3		1											7
ACTN2_HUMAN	Alpha-actinin-2	CM	104423	5.31	37	38	5.35	5.7	4	4	0.04	4	2	1	9.6	0.59																															4
ACTN3_HUMAN	Alpha-actinin-3	CM	103978	5.4	33	38	6	7.9	4	5	0.04	8	3	1	9.6	0.82																															5
ACTN4_HUMAN	Alpha-actinin-4	CM / IMAC	105309	5.27	31	38	8.6	9	4	7	0.04	16	5	4	9.5	0.95	4																	3													7
ACTS_HUMAN	Actin, alpha skeletal muscle	CM / IMAC	42393	5.23	39	97	17.7455	33.2	9	20	0.14	99	16	12	35.4	0.94												11		4			8	5		10									3		20	7
ACYP1_HUMAN	Acylphosphatase-1	CM	11261		18	18			3	3	0.36	3	1	1	106.6
ADA17_HUMAN	ADAM 17 precursor	CM	95017		14	14			7	7	0.04	7	1	1	12.6
ADCK2_HUMAN	Uncharacterized aarF domain-containing protein kinase 2	IMAC	69723	9.03	29	29	5.8	5.8	4	4	0.05	4	1	1	12.9	0.45																				4
ADHX_HUMAN	Alcohol dehydrogenase class-3	CM	40580	7.45	30	30	4.3	4.3	2	2		2	1	1	16	0.27													2
AF1L1_HUMAN	Actin filament-associated protein 1-like 1	CM	87515	6.38	18	18	3.8	3.8	2	2	0.04	2	1	1	11.4	0.33																																2
AFF1_HUMAN	AF4/FMR2 family member 1	IMAC	131422		15	15	1.4	1.4	1	1		1	1	1	3	0.47		1
AGRIN_HUMAN	Agrin precursor	CM / IMAC	223002	6.02	29	45	2.77692	5.2	8.7	14	0.03	96	16	15	6.3	0.83			10									11					5	13		12	14							11	8		8	9
AHDC1_HUMAN	A.T hook DNA-binding motif-containing protein 1	CM	170059	9.21	21	21	2.3	2.3	7	7	0.02	7	1	1	2.6	0.88
AHNK_HUMAN	Neuroblast differentiation-associated protein AHNAK	CM / IMAC	629608	5.8	16	17	2.95	3.9	15.5	20	0.01	31	2	2	1.3	3		11																		20
AK1A1_HUMAN	Alcohol dehydrogenase [NADP+]	CM	36915		26	26			3	3	0.1	3	1	1	32.5									3
AKA12_HUMAN	A-kinase anchor protein 12	IMAC	192051		15	15			2	2	0.02	2	1	1	2.1							2
AKAP2_HUMAN	A-kinase anchor protein 2	CM	96556	5.07	18	19	2.3	2.3	6	6		6	2	2	5.7	0.4
AKP13_HUMAN	A-kinase anchor protein 13	CM	310571	5.12	30	30	2.9	2.9	10	10	0.01	10	1	1	3.2	0.91
AL2SF_HUMAN	Amyotrophic lateral sclerosis 2 chromosomal region candidate gene 16 protein	CM	45020	6.05	15	15	4.2	4.2	1	1	0.08	1	1	1	22.2	0.19
ALBU_HUMAN	Serum albumin precursor	CM / IMAC	71363	5.92	63	190	12.6531	28.9	18.1	47	0.4	525	82	50	21	1.38		6	25	4	4		17	36	2	7		16	22	13	11		29	18	8	16	15		9	8	18	15	9		7	30	11	18	5
ALDOA_HUMAN	Fructose-bisphosphate aldolase A	CM / IMAC	39876	8.3	39	72	10.925	18.1	6.2	14	0.24	31	7	5	30.1	0.6																	1			3											8
ALDOB_HUMAN	Fructose-bisphosphate aldolase B	CM	39986	8	25	36	14.78	24.2	4.6	9	0.15	23	7	7	30	0.81								3				4								1											6	9
ALDOC_HUMAN	Fructose-bisphosphate aldolase C	CM	39855	6.41	37	52	12.75	12.9	6.5	7	0.09	13	3	2	25.1	0.51																															6
ALMS1_HUMAN	Alstrom syndrome protein 1	CM	463327	5.87	19	19	2	2	8	8	0.01	8	1	1	2.2	0.91
ALS2_HUMAN	Alsin	IMAC	183634	5.88	36	36	4.1	4.1	4	4		4	1	1	1.6	2.56
AMBP_HUMAN	AMBP protein precursor [Contains: Alpha-1-microglobulin	CM / IMAC	39912	5.95	45	88	12.1263	19.3	7.4	14	0.26	96	49	35	37.6	0.51			13			1		4		2		5		3	5	4	7	14		5	5							8	4	3	10	7
AMCL2_HUMAN	Protein AMAC1L2	CM	36017		17	17			1	1	0.1	1	1	1	8.3
AMOL2_HUMAN	Angiomotin-like protein 2	IMAC	85764	6.81	18	18	1.2	1.2	1	1		1	1	1	2.9	0.41																							1
AMPE_HUMAN	Glutamyl aminopeptidase	CM	109244		28	37			4	5	0.03	12	3	3	10.9																																5
AMPN_HUMAN	Aminopeptidase N	CM	109938	5.31	42	57	7.7	10.1	7.8	12	0.05	31	5	4	10.9	0.93								12																							12
AMY1_HUMAN	Alpha-amylase 1 precursor	CM / IMAC	58452	6.47	49	119	16.2	28.4	8	14	0.28	32	5	5	20.5	1.39								7										5													5
AMY2B_HUMAN	Alpha-amylase 2B precursor	CM / IMAC	58337	6.64	28	35	12.05	13.1	6.5	8	0.06	13	4	4	20.6	0.64								8										5													5
AMYP_HUMAN	Pancreatic alpha-amylase precursor	CM / IMAC	58391	6.6	48	123	14.98	25.4	7.8	13	0.3	39	7	7	20.6	1.23			6					8										5													5
ANGL2_HUMAN	Angiopoietin-related protein 2 precursor	CM	57617		21	22			2	2	0.06	2	2	2	20.8															2
ANGL6_HUMAN	Angiopoietin-related protein 6 precursor	CM	52093		22	22			6	6	0.07	6	1	1	23															6
ANGT_HUMAN	Angiotensinogen precursor	CM / IMAC	53439	5.87	38	46	6.2	9.7	2.7	5	0.11	8	5	3	22.5	0.43																	2
ANK2_HUMAN	Ankyrin-2	IMAC	432849	5.03	22	22	2.1	2.1	11	11	0.01	11	1	1	2.1	1																												11
ANKH1_HUMAN	Ankyrin repeat and KH domain-containing protein 1	IMAC	271451	5.46	15	15	1.2	1.2	4	4	0.01	4	1	1	3.3	0.36																				4
ANKK1_HUMAN	Ankyrin repeat and protein kinase domain-containing protein 1	IMAC	84632		15	15			4	4		4	1	1	4.7		4
ANR25_HUMAN	Ankyrin repeat domain-containing protein 25	IMAC	91972	5.44	21	21	2.2	2.2	5	5	0.04	5	1	1	3.3	0.67									5
ANR42_HUMAN	Ankyrin repeat domain-containing protein 42	CM	43622	6.01	18	18	3.6	3.6	2	2	0.09	2	1	1	10.3	0.35
ANR58_HUMAN	Ankyrin repeat domain-containing protein 58	IMAC	34031	9.62	18	18	2.2	2.2	3	3	0.11	3	1	1	26.4	0.08																													3
ANT3_HUMAN	Antithrombin-III precursor	CM	53058	6.32	27	46	7.91111	13.1	4.6	9	0.15	37	22	18	22.6	0.58								9				2	5				5			5		2				6	4				7	5
ANXA1_HUMAN	Annexin A1	CM / IMAC	38942	6.57	46	126	16.2833	21.7	6.5	11	0.3	39	9	7	30.8	0.7								8				8						6		7											7
ANXA2_HUMAN	Annexin A2	CM / IMAC	38832	7.57	51	146	24.9667	29.2	6.7	14	0.3	47	8	8	30.9	0.94												10		1			6			9
ANXA3_HUMAN	Annexin A3	CM / IMAC	36546	5.63	36	60	20.65	30	5.5	10	0.22	22	5	3	41	0.73	3																	10													8
ANXA4_HUMAN	Annexin A4	IMAC	36111	5.84	32	38	9.9	18.2	6.5	11	0.1	13	2	2	8.4	2.17												11
ANXA5_HUMAN	Annexin A5	CM	35993	4.94	28	28	8.4	8.4	3	3	0.1	3	1	1	27.8	0.3																															3
ANXA6_HUMAN	Annexin A6	IMAC	76215	5.42	35	35	5.1	5.1	3	3	0.05	3	1	1	3.9	1.31												3
APOA1_HUMAN	Apolipoprotein A-I precursor	CM / IMAC	30777	5.56	52	170	4.9	4.9	9.3	44	0.85	74	10	10	39	0.13								44						2			8
APOA4_HUMAN	Apolipoprotein A-IV precursor	CM	45398		61	61			14	14	0.27	14	1	1	26.4									14
APOC1_HUMAN	Apolipoprotein C-I precursor	CM / IMAC	9332	8.01	18	18	6	6	4	5		8	3	3	96.4	0.06					5																								3
APOD_HUMAN	Apolipoprotein D precursor	CM	21561	5.06	23	27	21	24.3	6.3	8	0.18	19	4	3	55.7	0.44																	8
ARFP1_HUMAN	Arfaptin-1	CM	41795	6.24	16	16	1.3	1.3	1	1		1	1	1	15.6	0.08							1
ARFRP_HUMAN	ADP-ribosylation factor-related protein 1	CM / IMAC	23070		22	25			1.5	2	0.17	3	2	2	17.3
ARGI1_HUMAN	Arginase-1	IMAC	34906	6.72	42	49	17.1	17.1	5.5	6	0.11	11	2	2	11.5	1.49												6					5
ARHG1_HUMAN	Rho guanine nucleotide exchange factor 1	IMAC	103119	5.47	15	15	2.7	2.7	2	2	0.04	2	1	1	8.7	0.31																		2
ARHG8_HUMAN	Neuroepithelial cell-transforming gene 1 protein	IMAC	67740	9.31	26	26	6	6	5	5		5	1	1	4.4	1.36
ARI3A_HUMAN	AT-rich interactive domain-containing protein 3A	CM	62945	4.84	20	20	2	2	1	1	0.06	1	1	1	15.9	0.13			1
ARK72_HUMAN	Aflatoxin B1 aldehyde reductase member 2	CM	40045		22	22			2	2	0.09	2	1	1	20.7																																2
ARL15_HUMAN	ADP-ribosylation factor-like protein 15	CM	23275		19	19			2	2	0.16	2	1	1	51.6
ARL6_HUMAN	ADP-ribosylation factor-like protein 6	CM	21268	8.72	25	25	12.9	12.9	3	3	0.18	3	1	1	47	0.27																															3
ARPC4_HUMAN	Actin-related protein 2/3 complex subunit 4	CM	19781	8.53	21	21	19	19	3	3	0.19	3	1	1	50.6	0.38																															3
ARPC5_HUMAN	Actin-related protein 2/3 complex subunit 5	CM	16377	5.47	17	17	15.9	15.9	3	3	0.24	3	1	1	61.1	0.26																															3
ARRS_HUMAN	S-arrestin	IMAC	45290	6.14	26	26	2.7	2.7	2	2	0.08	2	1	1	33.1	0.08																		2
ARSA_HUMAN	Arylsulfatase A precursor	CM	54443	5.65	21	25	4.7	6.5	2	3	0.07	6	7	5	18.4	0.35			1				1
ARSB_HUMAN	Arylsulfatase B precursor	CM / IMAC	60200	8.43	19	25	6.2	8.1	6.3	8	0.06	19	4	3	16.6	0.49																															5	6
ASAH1_HUMAN	Acid ceramidase precursor	CM	45106		20	20			5	5	0.08	5	1	1	26.6																		5
ASAH2_HUMAN	Neutral ceramidase	CM	86028		17	17			2	2	0.04	2	1	1	13.9
ASH1L_HUMAN	Probable histone-lysine N-methyltransferase ASH1L	CM	336381	9.46	17	17	2.5	2.5	5	5	0.01	5	1	1	3	0.83
ASPG_HUMAN	N(4)-(beta-N-acetylglucosaminyl)-L-asparaginase precursor	CM	37821	5.86	22	22	3.5	3.5	1	1	0.1	1	1	1	17.2	0.2
ASPM_HUMAN	Abnormal spindle-like microcephaly-associated protein	CM	413449	10.45	21	21	5.1	5.1	21	21	0.01	21	1	1	2.4	2.13
ASPP2_HUMAN	Apoptosis-stimulating of p53 protein 2	CM	126300	5.78	29	30	3.2	4.8	4	5	0.03	8	2	2	7.9	0.61
AT10A_HUMAN	Probable phospholipid-transporting ATPase VA	IMAC	169911	8.7	16	16	3.5	3.5	4	4	0.02	4	1	1	1.5	2.33																4
AT2B3_HUMAN	Plasma membrane calcium-transporting ATPase 3	IMAC	135337	5.45	16	16	1.6	1.6	5	5	0.03	5	1	1	10.3	0.16
ATF3_HUMAN	Cyclic AMP-dependent transcription factor ATF-3	IMAC	20861	8.8	16	16	6.1	6.1	5	5	0.18	5	1	1	67.1	0.09
ATL3_HUMAN	ADAMTS-like protein 3 precursor	IMAC	194575	8.2	14	14	2.1	2.1	5	5	0.02	5	1	1	1.5	1.4											5
ATP7A_HUMAN	Copper-transporting ATPase 1	IMAC	164816	5.94	27	27	3.3	3.3	16	16	0.02	16	1	1	1.8	1.83									16
ATP7B_HUMAN	Copper-transporting ATPase 2	CM	158987	6.29	17	17	4.3	4.3	3	3	0.02	3	1	1	4.4	0.98
ATPB_HUMAN	ATP synthase subunit beta, mitochondrial precursor	CM	56559	5.26	15	15	5.7	5.7	3	3		3	1	1	11.5	0.5																														3
ATRN_HUMAN	Attractin precursor	CM	163556	7.24	22	31	0.85	1.1	1.5	2	0.02	3	2	2	6.1	0.18																									2
B2MG_HUMAN	Beta-2-microglobulin precursor [Contains: Beta-2-microglobulin form pI 5.3]	CM / IMAC	13828	6.06	32	72	23.86	39.5	15.3	44	0.68	260	29	25	101.2	0.39								9								13	26	6		15	20			2		44	35		20	5	6	17
B4GN4_HUMAN	N-acetyl-beta-glucosaminyl-glycoprotein 4-beta-N-acetylgalactosaminyltransferase 1	CM	117025	6.51	14	15	1.2	1.2	4	6	0.03	8	2	2	10.3	0.12																	6
BARD1_HUMAN	BRCA1-associated RING domain protein 1	IMAC	88130	8.99	26	26	4.6	4.6	6	6	0.04	6	1	1	10.2	0.45																													6
BASI_HUMAN	Basigin precursor	CM	42599	5.39	18	18	3.9	3.9	2	2	0.09	2	1	1	23.5	0.17			2
BAXC_HUMAN	BAX protein, cytoplasmic isoform gamma	CM / IMAC	21184	11.22	23	26	14.6	14.6	7	11	0.92	14	2	2	63.4	0.23																				3
BAZ1A_HUMAN	Bromodomain adjacent to zinc finger domain protein 1A	CM	180355	6.2	27	27	3.6	3.6	10	10		10	1	1	4.6	0.78
BCL9_HUMAN	B-cell CLL/lymphoma 9 protein	IMAC	149542	9.06	16	16	3.1	3.1	20	20	0.02	20	1	1	2	1.55
BCOR_HUMAN	BCL-6 corepressor	CM	193727	6.06	16	16	2.6	2.6	4	4	0.02	4	1	1	5.2	0.5
BGAL_HUMAN	Beta-galactosidase precursor	CM / IMAC	76546	6.1	21	28	3.8	7.1	4	7	0.05	16	5	5	15.7	0.45														4							2									3
BGAM_HUMAN	Beta-galactosidase-related protein precursor	CM / IMAC	60893		21	28	3.8	7.1	4	7		16	5	5	19.7	0.36														4							2									3
BGLR_HUMAN	Beta-glucuronidase precursor	CM	75073	6.54	24	30	4.35	6.5	2.7	4	0.05	8	3	3	16	0.41			3					1																							4
BHMT1_HUMAN	Betaine--homocysteine S-methyltransferase 1	CM	45454		16	16			3	3	0.08	3	1	1	26.4
BICD2_HUMAN	Protein bicaudal D homolog 2	IMAC	93760	5.35	29	29	7.5	7.5	5	5	0.04	5	1	1	3.2	2.34												5
BLMH_HUMAN	Bleomycin hydrolase	IMAC	53189		20	20			7	7	0.07	7	1	1	7.5																		7
BMP10_HUMAN	Bone morphogenetic protein 10 precursor	IMAC	48560		14	14			2	2	0.08	2	1	1	8.2
BMP4_HUMAN	Bone morphogenetic protein 4 precursor	IMAC	47011	8.97	14	14	1.7	1.7	1	1	0.08	1	1	1	19.1	0.09																		1
BNC1_HUMAN	Zinc finger protein basonuclin-1	CM	112568		20	20			4	4	0.03	4	1	1	10.7									4
BOLA2_HUMAN	BolA-like protein 2	CM / IMAC	10288	6.07	35	42	18.6	18.6	1.5	2	0.39	3	4	3	116.6	0.16														2															2
BPAEA_HUMAN	Bullous pemphigoid antigen 1, isoforms 6/9/10	CM / IMAC	594124	5.49	23	28	3	3.8	20	25	0.01	60	3	3	2.4	1.58				22													25
BT2A1_HUMAN	Butyrophilin subfamily 2 member A1 precursor	CM	60688	5.91	25	30	4.3	5.7	2	2	0.06	2	4	3	16.5	0.35
BT2A2_HUMAN	Butyrophilin subfamily 2 member A2 precursor	CM	59754	5.73	26	30	4.4	6.3	3	4	0.06	6	3	3	16.7	0.38
BTD_HUMAN	Biotinidase precursor	CM / IMAC	59768	5.5	24	31	2.5	2.5	1.5	2	0.06	3	3	3	20.1	0.12																	2				1							1
BXDC2_HUMAN	Brix domain-containing protein 2	CM	41686		17	17			3	3	0.09	3	1	1	28.8
BZW1_HUMAN	Basic leucine zipper and W2 domain-containing protein 1	IMAC	48214	5.75	18	18	2.6	2.6	1	1	0.08	1	1	1	5.2	0.5																							1
C1QT3_HUMAN	Complement C1q tumor necrosis factor-related protein 3 precursor	CM	27279	6.04	20	20	14.6	14.6	2	2	0.14	2	1	1	36.7	0.4
CA165_HUMAN	Coiled-coil domain-containing protein C1orf165	CM	48581	5.88	23	23	11.2	11.2	6	6	0.08	6	1	1	17.1	0.65																																6
CA168_HUMAN	Uncharacterized protein C1orf168	CM	82754		17	17			2	2	0.04	2	1	1	3.6																																		2
CAD11_HUMAN	Cadherin-11 precursor	CM	88421		17	17			1	1	0.04	1	1	1	3.4
CAD13_HUMAN	Cadherin-13 precursor	CM	78742	4.8	26	29	6.15	8.1	4.5	5	0.05	9	2	2	12.7	0.64			5
CADH1_HUMAN	Epithelial cadherin precursor	CM	97911	4.58	25	36	3.7	6.2	4	7	0.04	8	2	2	10.2	0.61			7																						1
CADM4_HUMAN	Cell adhesion molecule 4 precursor	CM	43241	5.92	37	55	4.9	4.9	2.3	4	0.14	7	4	3	27.8	0.18
CAH1_HUMAN	Carbonic anhydrase 1	CM / IMAC	28927	6.59	30	40	10.8333	20.3	2.5	4	0.21	10	6	6	41.5	0.49								3						1							4
CAH2_HUMAN	Carbonic anhydrase 2	CM	29303		31	43			2.5	3	0.21	5	2	2	41									2
CALL3_HUMAN	Calmodulin-like protein 3	CM	16948	4.3	71	71	22.1	22.1	4	4	0.51	4	1	1	59	0.37																				4
CALL5_HUMAN	Calmodulin-like protein 5	IMAC	15920	4.34	54	54	32.2	32.2	4	4	0.55	4	1	1	18.8	1.71												4
CALU_HUMAN	Calumenin precursor	IMAC	37107	4.47	28	28	10.8	10.8	3	3		3	1	1	24.3	0.44																					3
CAP7_HUMAN	Azurocidin precursor	CM	27342	9.75	29	43	9.95	14.7	2.7	4	0.14	8	5	5	43.9	0.33								3																							4	1
CAPG_HUMAN	Macrophage-capping protein	CM / IMAC	38802	5.88	40	70	9.2	14.7	5.9	12	0.34	41	14	14	30.9	0.48								2						7															1	1	1
CAR14_HUMAN	Caspase recruitment domain-containing protein 14	CM	114953	5.62	15	15	5.2	5.2	3	3	0.03	3	1	1	3.9	1.33
CARKL_HUMAN	Carbohydrate kinase-like protein	CM	51960	6.67	14	14	4.2	4.2	2	2	0.07	2	1	1	12.5	0.34
CASPE_HUMAN	Caspase-14 precursor	CM / IMAC	27964	5.44	34	55	12.9667	21.5	4.3	8	0.22	17	4	4	35.8	0.6												6					2			8
CASQ1_HUMAN	Calsequestrin-1 precursor	CM	44498		24	24			2	2	0.08	2	1	1	6.7
CATA_HUMAN	Catalase	CM / IMAC	59984	6.9	27	34	9.75	14.8	4.6	9	0.1	23	5	4	20	0.74								3										9													2
CATB_HUMAN	Cathepsin B precursor	CM / IMAC	38791	5.88	29	44	6.05	8.8	3.7	7	0.1	22	16	14	30.9	0.28												3			2		3			3							4					3	1
CATC_HUMAN	Dipeptidyl-peptidase 1 precursor	CM / IMAC	52640	6.54	36	105	4.77143	8	3	5	0.11	15	13	11	22.8	0.35												1					4			2							3		2	2	2	1
CATD_HUMAN	Cathepsin D precursor	CM / IMAC	45065	6.1	34	74	12.06	25.5	9.3	19	0.17	102	13	11	26.6	0.96								9				3					19														16	7
CATG_HUMAN	Cathepsin G precursor	CM / IMAC	29179	11.19	34	47	10.3333	15.3	3	4	0.21	9	4	2	51.4	0.3																		4													3
CATH_HUMAN	Cathepsin H precursor	CM	38005	8.38	34	43	13.3333	18.5	8	10	0.21	16	3	1	26.3	0.7																															10
CATL1_HUMAN	Cathepsin L1 precursor	CM	38020	5.31	30	42	4.2	4.2	1	1	0.1	1	4	3	21.8	0.19																															1	1
CATS_HUMAN	Cathepsin S precursor	CM	38123	8.61	23	23	7.3	7.3	3	3	0.1	3	1	1	17.1	0.43
CATZ_HUMAN	Cathepsin Z precursor	CM / IMAC	34552	6.7	27	40	9.13333	17.5	3.2	6	0.17	16	13	12	34.7	0.5			4											4			4	2													2
CAYP1_HUMAN	Calcyphosin	CM	21081		36	36			3	3	0.18	3	1	1	56.9
CBPB1_HUMAN	Carboxypeptidase B precursor	CM	47766	6.16	38	42	7.7	8.9	4.5	5	0.12	9	2	1	20.9	0.43																																5
CBPC3_HUMAN	Cytosolic carboxypeptidase 3	IMAC	117208	8.98	19	19	6	6	4	4	0.03	4	1	1	2.6	2.31
CC105_HUMAN	Coiled-coil domain-containing protein 105	CM	57436	9.89	17	17	4.4	4.4	5	5		5	1	1	12.2	0.36
CC132_HUMAN	Coiled-coil domain-containing protein 132	IMAC	112028	5.85	22	22	0.6	0.6	2	2	0.03	2	1	1	2.7	0.22									2
CCD11_HUMAN	Coiled-coil domain-containing protein 11	CM	62233		33	33			1	1	0.06	1	1	1	19.3
CCD18_HUMAN	Coiled-coil domain-containing protein 18	IMAC	170102	5.52	38	38	6.6	6.6	9	9	0.02	9	1	1	1.8	3.67												9
CCD36_HUMAN	Coiled-coil domain-containing protein 36	CM	65750		18	18			7	7	0.06	7	1	1	12.6																																7
CCD39_HUMAN	Coiled-coil domain-containing protein 39	CM	88743	6.02	17	17	8.1	8.1	5	5	0.04	5	1	1	11.3	0.72
CCD46_HUMAN	Coiled-coil domain-containing protein 46	IMAC	113261	6.25	39	39	1.3	1.3	1	1	0.03	1	1	1	7.9	0.16																					1
CD018_HUMAN	Uncharacterized protein C4orf18	CM	57552	9.75	19	19	2.5	2.5	3	3		3	1	1	14.4	0.17
CD14_HUMAN	Monocyte differentiation antigen CD14 precursor	CM / IMAC	40703	5.84	35	94	13.2125	18.1	5	10	0.33	25	15	13	29.5	0.61			6					2						2			10	3													3
CD248_HUMAN	Endosialin precursor	CM	82855	5.18	35	60	4.96	7.4	7.2	11	0.07	43	10	7	14.5	0.51			6										6
CD2B2_HUMAN	CD2 antigen cytoplasmic tail-binding protein 2	CM / IMAC	37760	4.49	20	20	5.7	7.3	2.3	4	0.1	7	3	3	14.6	0.5						1														2					4
CD44_HUMAN	CD44 antigen precursor	CM	82066	5.13	35	35	3	3	2	2	0.05	2	1	1	12.2	0.25
CD5L_HUMAN	CD5 antigen-like precursor	IMAC	39628	5.28	15	16	6.9	6.9	1	1	0.09	1	2	2	22.7	0.3																				1								1
CDC73_HUMAN	Parafibromin	CM	60690		21	21			4	4	0.06	4	1	1	19.8
CDK2_HUMAN	Cell division protein kinase 2	CM / IMAC	34100		40	45			1.5	2	0.11	3	2	2	11.7
CDSN_HUMAN	Corneodesmosin precursor	IMAC	52293	8.69	22	22	2.1	2.1	1	1	0.07	1	1	1	17.2	0.12																				1
CDYL2_HUMAN	Chromodomain Y-like protein 2	IMAC	57185	8.93	14	14	3.2	3.2	3	3	0.07	3	1	1	5.2	0.62											3
CE170_HUMAN	Centrosomal protein of 170 kDa	CM	175690	6.64	19	19	2.5	2.5	4	4	0.02	4	1	1	4.7	0.53												4
CE290_HUMAN	Centrosomal protein Cep290	CM	291067	5.75	20	20	4	4	10	10	0.01	10	1	1	3.4	1.18
CEAM8_HUMAN	Carcinoembryonic antigen-related cell adhesion molecule 8 precursor	CM / IMAC	38439	6.95	26	41	5.7	5.7	1.5	2	0.16	3	4	3	26	0.22			1
CEL_HUMAN	Bile salt-activated lipase precursor	CM	78687	5.18	26	37	3.4	3.4	3.5	5	0.08	7	4	4	15.3	0.22								2
CELF5_HUMAN	CUG-BP- and ETR-3-like factor 5	CM	52754	8.57	22	22	4	4.9	2	2	0.07	2	2	2	10.4	0.47																										2
CENG1_HUMAN	Centaurin-gamma-1	CM	125471	9.91	15	15	5.5	5.5	5	5	0.03	5	1	1	6.6	0.83
CENPA_HUMAN	Histone H3-like centromeric protein A	CM	16047	11.71	14	14	11.4	11.4	2	2	0.24	2	1	1	62.3	0.18
CENPH_HUMAN	Centromere protein H	CM	28538	5.23	18	18	8.9	8.9	2	2	0.13	2	1	1	22.8	0.39																														2
CENPQ_HUMAN	Centromere protein Q	CM	30595	9.43	16	16	6.7	6.7	3	3		3	1	1	27.1	0.25																																3
CERU_HUMAN	Ceruloplasmin precursor	CM / IMAC	123060	5.44	31	59	3.55	6.8	3.8	8	0.06	23	10	9	9.8	0.69								4						5														1			5
CETP_HUMAN	Cholesteryl ester transfer protein precursor	CM	55155	5.7	16	16	3	3	4	4	0.07	4	2	2	11.8	0.25							4
CF060_HUMAN	Uncharacterized protein C6orf60	IMAC	119554		19	19			3	3	0.03	3	1	1	3.3		3
CFAB_HUMAN	Complement factor B precursor	CM	86901		32	38			12.5	14	0.07	25	2	2	13.8									11
CFAH_HUMAN	Complement factor H precursor	CM	143773		26	33			4	4	0.03	4	2	2	8.3																		4
CFAI_HUMAN	Complement factor I precursor	CM	68116		25	25			5	5	0.05	5	1	1	17.6
CG024_HUMAN	Uncharacterized protein C7orf24	IMAC	21236	5.07	58	58	11.2	11.2	2	2	0.18	2	1	1	14.1	0.79												2
CG033_HUMAN	Uncharacterized protein C7orf33	IMAC	19646	10.26	17	17	13	13	1	1	0.2	1	1	1	71.3	0.18
CG1_HUMAN	Protein CG1	CM	75045	8.26	17	17	2.7	2.7	1	1	0.05	1	1	1	6	0.45																				1
CH10_HUMAN	10 kDa heat shock protein, mitochondrial	CM	10932	8.89	31	47	31.7	49	5.3	16	0.93	32	9	8	109.8	0.45								2						4																		6
CH3L2_HUMAN	Chitinase-3-like protein 2 precursor	IMAC	43728	7.11	69	69	18.2	18.2	7	7	0.09	7	1	1	6.9	2.64												7
CHD2_HUMAN	Chromodomain-helicase-DNA-binding protein 2	CM	212311	8.22	19	19	4.3	4.3	11	11	0.02	11	1	1	3.9	1.1
CHD6_HUMAN	Chromodomain-helicase-DNA-binding protein 6	IMAC	305412		15	15			6	6		6	1	1	1.3
CHD7_HUMAN	Chromodomain-helicase-DNA-binding protein 7	CM	337749	5.95	14	14	1.6	1.6	5	5		5	1	1	3	0.53
CHL1_HUMAN	Neural cell adhesion molecule L1-like protein precursor	CM	136110		34	34			3	3	0.03	3	1	1	8.8
CHP1_HUMAN	Calcium-binding protein p22	CM / IMAC	22456	4.98	16	16	13.3	13.3	2	2	0.17	2	3	3	62.3	0.21
CHRD_HUMAN	Chordin precursor	CM	104769	8.07	18	18	5	5	6	6	0.04	6	1	1	9.5	0.53																															6
CING_HUMAN	Cingulin	IMAC	136612	5.46	15	15	1.6	1.6	2	2	0.03	2	1	1	10.2	0.16				2
CIR1A_HUMAN	Cirhin	IMAC	77574	9.03	29	29	1	1	3	3	0.05	3	1	1	11.6	0.09																													3
CJ030_HUMAN	Uncharacterized protein C10orf30	CM	58119	9.26	17	17	4.6	4.6	3	3	0.06	3	1	1	17.2	0.27
CJ079_HUMAN	WD repeat-containing protein C10orf79	CM	193936	5.68	15	15	2.5	2.5	3	3	0.02	3	1	1	2.3	1.09																				3
CJ115_HUMAN	Putative uncharacterized protein C10orf115	CM	10401	6.27	41	41	6.4	6.4	2	2	0.38	2	1	1	96.1	0.07												2
CK054_HUMAN	Ester hydrolase C11orf54	CM	35630		20	20			4	4	0.11	4	1	1	33.7
CKAP5_HUMAN	Cytoskeleton-associated protein 5	CM / IMAC	227218	8.03	18	20	3.03333	4	8	11	0.02	24	3	3	6.6	0.61		4																9
CL030_HUMAN	TPR repeat-containing protein C12orf30	CM	113204	6.21	30	30	1	1	2	2		2	1	1	5.7	0.18													2
CL041_HUMAN	Uncharacterized protein C12orf41	CM	56130	6.18	27	27	1.2	1.2	1	1	0.07	1	1	1	11.6	0.1													1
CL16A_HUMAN	Protein CLEC16A	IMAC	118684		16	16			1	1	0.03	1	1	1	3.4
CLAP1_HUMAN	CLIP-associating protein 1	CM	170476	9.14	24	27	3.6	4.6	9	19	0.02	36	4	4	7	0.66			6														19
CLH1_HUMAN	Clathrin heavy chain 1	IMAC	193381		24	24			9	9	0.02	9	1	1	2.1		9
CLM9_HUMAN	CMRF35-like molecule 9 precursor	CM	36599	5.68	36	51	3.9	5.4	3	5	0.1	15	6	6	32.8	0.16			1														3
CN093_HUMAN	Uncharacterized protein C14orf93 precursor	IMAC	59381	5.71	19	19	15.4	15.4	5	5	0.06	5	1	1	5.1	3.02
CNDP2_HUMAN	Cytosolic non-specific dipeptidase	CM	53220	5.66	39	44	2.95	3.2	1.5	2	0.07	3	2	2	18.8	0.17																																2
CNNM3_HUMAN	Metal transporter CNNM3	IMAC	76119	5.76	27	27	6.1	6.1	8	8		8	1	1	3.9	1.56												8
CO033_HUMAN	Uncharacterized protein C15orf33	CM / IMAC	60354	9	19	26	1	1	35.5	41	0.06	142	7	7	23.2	0.04		29		37								37	41
CO1A1_HUMAN	Collagen alpha-1(I) chain precursor	CM	139937	5.6	19	19	9.4	9.4	8	9	0.03	16	2	2	8.6	1.09																	9															7
CO3_HUMAN	Complement C3 precursor [Contains: Complement C3 beta chain; Complement C3 alpha chain; C3a anaphylatoxin; Complement C3b alpha' chain; Complement C3c alpha' chain fragment 1; Complement C3dg fragment; Complemen...	CM / IMAC	188686	6.02	51	129	6.16667	7	13.3	28	0.09	93	9	9	6.4	1.09								28				11		3																	10
CO4A_HUMAN	Complement C4-A precursor	CM	194367	6.65	37	81	2.98333	4.7	6.3	13	0.05	57	13	11	6.2	0.76			8					12							3										5						7	2
CO4B_HUMAN	Complement C4-B precursor	CM	194332		39	81	2.98333	4.7	7.2	15	0.08	72	14	12	6.2	0.76			8					12							3		15								5						7	2
CO5A2_HUMAN	Collagen alpha-2(V) chain precursor	CM	145878	6.07	21	21	6.2	6.2	9	9	0.03	9	1	1	3.1	2																				9
CO5A3_HUMAN	Collagen alpha-3(V) chain precursor	IMAC	172734	6.37	16	16	7.4	7.4	16	16	0.02	16	1	1	1.7	4.35
CO6A1_HUMAN	Collagen alpha-1(VI) chain precursor	CM / IMAC	109669	5.26	35	56	6.28125	13.9	5.5	10	0.07	55	21	16	10.9	1.28			4				3						9	5						4										5	9	7
CO6A2_HUMAN	Collagen alpha-2(VI) chain precursor	IMAC	109776	5.85	23	23	5.2	5.2	6	6	0.03	6	1	1	8.2	0.63
CO6A3_HUMAN	Collagen alpha-3(VI) chain precursor	CM / IMAC	345260	6.4	38	74	3.51154	6.5	12.1	24	0.02	194	49	33	4.3	1.51			20									11		8			15	10	4	21	11			9	4		9	12	12	13	17	13
CO7A1_HUMAN	Collagen alpha-1(VII) chain precursor	IMAC	296186		20	20			14	14	0.01	14	1	1	1.4																		14
CO8G_HUMAN	Complement component C8 gamma chain precursor	CM	22448	8.49	24	30	25.95	26.2	3	5	0.27	9	6	6	53.5	0.49														1																		3
CO9_HUMAN	Complement component C9 precursor [Contains: Complement component C9a; Complement component C9b]	CM	64656		32	36			4.5	5	0.06	9	3	3	18.6									5
CO9A1_HUMAN	Collagen alpha-1(IX) chain precursor	IMAC	91869	8.93	16	16	2.8	2.8	9	9		9	1	1	3.3	0.85
CO9A2_HUMAN	Collagen alpha-2(IX) chain precursor	IMAC	65131	9.23	16	16	9.1	9.1	19	19		19	1	1	4.6	1.98
COA1_HUMAN	Acetyl-CoA carboxylase 1	IMAC	267262	5.95	38	38	2.1	2.1	4	4	0.01	4	1	1	1.5	1.4																	4
COBA2_HUMAN	Collagen alpha-2(XI) chain precursor	IMAC	172571	5.89	16	16	4.9	4.9	17	17	0.02	17	1	1	1.7	2.88
COCA1_HUMAN	Collagen alpha-1(XII) chain precursor	CM	334341	5.38	27	27	0.8	0.8	4	4	0.01	4	1	1	2.5	0.32												4
COF1_HUMAN	Cofilin-1	IMAC	18730	8.22	21	21	8.4	8.4	1	1	0.21	1	1	1	48.1	0.17																													1
COFA1_HUMAN	Collagen alpha-1(XV) chain precursor [Contains: Endostatin	CM / IMAC	142289	4.89	24	34	4.675	5.9	7.5	9	0.04	30	6	6	8.4	0.7			7					9													8										6
COIA1_HUMAN	Collagen alpha-1(XVIII) chain precursor [Contains: Endostatin]	CM	179470	5.67	16	16	1.9	1.9	9	9	0.02	9	1	1	3.1	0.61
COKA1_HUMAN	Collagen alpha-1(XX) chain precursor	CM	141056	7.64	18	18	1.2	1.2	1	1	0.03	1	1	1	7.1	0.17
COMP_HUMAN	Cartilage oligomeric matrix protein precursor	CM	85456	4.34	29	39	4.94	9.6	4.4	7	0.04	22	13	11	11.7	0.82												3	3		4					4										4	6	4
COR1A_HUMAN	Coronin-1A	CM / IMAC	51710	6.25	27	28	7.6	7.6	2	3	0.07	4	2	2	23.2	0.33								1										3
COR2A_HUMAN	Coronin-2A	CM	60276	8.24	15	15	1.5	1.5	1	1	0.06	1	1	1	9.1	0.16
COTL1_HUMAN	Coactosin-like protein	CM	16059		28	28			2	2	0.24	2	1	1	74.7																		2
COX42_HUMAN	Cytochrome c oxidase subunit 4 isoform 2, mitochondrial precursor	CM / IMAC	20181	9.65	18	20	3.5	3.5	16	20	0.19	32	2	2	34.7	0.1
CPNE7_HUMAN	Copine-7	CM	71434	5.97	13	13	3	3	2	2		2	1	1	7.7	0.39																									2
CPSF3_HUMAN	Cleavage and polyadenylation specificity factor subunit 3	CM	78170		18	18			3	3	0.05	3	1	1	15.4
CPVL_HUMAN	Probable serine carboxypeptidase CPVL precursor	IMAC	54448	5.39	20	20	3.8	3.8	1	1	0.07	1	1	1	25.7	0.15
CQ080_HUMAN	Uncharacterized protein C17orf80	CM	68375	9.3	18	18	5.6	5.6	4	4	0.05	4	1	1	9.5	0.59
CRADD_HUMAN	Death domain-containing protein CRADD	IMAC	22802	6.32	18	18	6	6	1	1	0.17	1	1	1	39.5	0.15																												1
CRP_HUMAN	C-reactive protein precursor [Contains: C-reactive protein(1-205)]	CM	25209		20	25			3	4	0.15	6	2	2	47.6																		4
CRUM1_HUMAN	Crumbs homolog 1 precursor	IMAC	161199	4.84	31	31	1.4	1.4	2	2	0.02	2	1	1	1.9	0.74									2
CRYAB_HUMAN	Alpha-crystallin B chain	CM	20159	6.76	24	24	22.9	22.9	3	3	0.19	3	1	1	41.2	0.56																																3
CRYL1_HUMAN	Lambda-crystallin homolog	CM	35932	5.81	21	21	6.6	6.6	2	2	0.1	2	1	1	27.8	0.24																															2
CS010_HUMAN	Uncharacterized protein C19orf10 precursor	CM	18909	6.2	24	26	5.2	5.2	1.5	2	0.2	3	2	2	63.5	0.08			1														2
CSN3_HUMAN	COP9 signalosome complex subunit 3	IMAC	48443		25	25			2	2	0.08	2	1	1	8.3							2
CSN5_HUMAN	COP9 signalosome complex subunit 5	IMAC	37807		18	18			1	1	0.1	1	1	1	10.6		1
CSPG4_HUMAN	Chondroitin sulfate proteoglycan 4 precursor	CM	251178		25	29			7	7	0.02	7	2	2	4.8
CSTF3_HUMAN	Cleavage stimulation factor 77 kDa subunit	CM	83377	8.26	18	21	3.9	3.9	3	3	0.04	3	2	2	14.4	0.27																	3
CSTN3_HUMAN	Calsyntenin-3 precursor	CM	107523	5.24	16	16	4.5	4.5	3	3	0.03	3	1	1	7.7	0.58
CT024_HUMAN	Uncharacterized protein C20orf24	CM	15658	5.06	31	31	4.4	4.4	7	7		7	1	1	44.7	0.1
CT085_HUMAN	Uncharacterized protein C20orf85	CM	15947	8.72	24	24	8	8	2	2	0.24	2	1	1	43.9	0.18																															2
CTGE2_HUMAN	Protein cTAGE-2	CM	86631	6.06	13	13	3.2	3.2	2	2		2	1	1	6.3	0.51																									2
CTGE5_HUMAN	Cutaneous T-cell lymphoma-associated antigen 5	CM	91238	5.15	13	13	3.2	3.2	2	2	0.04	2	1	1	6	0.53																									2
CTNA3_HUMAN	Catenin alpha-3	CM	100835	5.83	15	15	4.6	4.6	7	7	0.04	7	1	1	9.9	0.46
CUBN_HUMAN	Cubilin precursor	CM	407451	5.14	28	38	2.5	3.5	9.3	11	0.02	28	3	2	2.5	1.4																															11
CUL7_HUMAN	Cullin-7	CM	192927	5.57	19	19	3.8	3.8	5	5	0.02	5	1	1	5.2	0.73
CV106_HUMAN	Uncharacterized potential DNA-binding protein C14orf106	CM	129997	9.31	22	22	1.4	1.4	2	2	0.03	2	1	1	5	0.28
CX059_HUMAN	Uncharacterized protein CXorf59	CM	58742	6.44	18	18	2.2	2.2	1	1	0.06	1	1	1	17	0.13			1
CYTA_HUMAN	Cystatin-A	CM / IMAC	11006	5.38	33	83	31.5364	48	3.5	6	0.61	21	21	13	109	0.44			6									4					1			4	1		1					2			2	1
CYTB_HUMAN	Cystatin-B	CM / IMAC	11197	6.96	37	77	41.7222	61.2	7.4	21	1.57	81	25	17	134	0.46														2			3	7		13	11							4	21	3	1	2
CYTC_HUMAN	Cystatin-C precursor	CM / IMAC	16027	9	30	52	15.88	22.6	4.1	8	0.57	29	21	19	74.9	0.3			4					4						2			8			3	3							3	1	3		4
CYTM_HUMAN	Cystatin-M precursor	CM / IMAC	16796	8.31	45	69	19.9	27.5	11.8	16	1.03	47	4	4	89.3	0.31																	16	9														8
CYTN_HUMAN	Cystatin-SN precursor	CM	16590	6.82	23	23	7.8	7.8	1	1	0.23	1	1	1	60.3	0.13
CYTS_HUMAN	Cystatin-S precursor	CM	16499		23	23	7.8	7.8	1	1		1	1	1	60.6	0.13
DAB2_HUMAN	Disabled homolog 2	IMAC	82561		15	15			3	3	0.04	3	1	1	4.8		3
DAPLE_HUMAN	Protein Daple	CM	229353	5.87	16	16	4.8	4.8	8.5	9	0.02	17	2	2	5.2	0.92																																8
DCBD1_HUMAN	Discoidin, CUB and LCCL domain-containing protein 1 precursor	CM	78661	8.26	21	21	3.5	3.5	6	6	0.05	6	1	1	12.7	0.28
DCD_HUMAN	Dermcidin precursor	CM / IMAC	11398	6.08	41	96	27.3385	43.6	4.9	13	0.59	34	40	27	87.7	0.5		1			3	1			3		2	5				2	3	3		5	3		4			2		3	4
DCP1A_HUMAN	mRNA-decapping enzyme 1A	IMAC	63449	5.83	28	30	8.86667	12.9	64.7	68	0.06	194	3	3	4.7	2.74												62
DCXR_HUMAN	L-xylulose reductase	CM	26198	8.33	28	29	11.5	15.6	2.5	3	0.15	5	2	2	38.2	0.41																																2
DDAH2_HUMAN	N(G),N(G)-dimethylarginine dimethylaminohydrolase 2	CM	29929	5.66	29	42	10.3	13.7	1.5	2	0.13	3	5	4	33.4	0.41												1																			2	2
DDHD2_HUMAN	Phospholipase DDHD2	CM	81715	5.23	19	19	2.8	3.2	2.5	3	0.05	5	2	2	10.2	0.31																										2
DDX3X_HUMAN	ATP-dependent RNA helicase DDX3X	CM	73243		15	15			7	7		7	1	1	4.1
DDX41_HUMAN	Probable ATP-dependent RNA helicase DDX41	CM	70521	6.4	18	18	4	4	2	2	0.05	2	1	1	14.2	0.28
DDX53_HUMAN	Probable ATP-dependent RNA helicase DDX53	IMAC	71553	9.16	21	21	8.2	8.2	6	6	0.05	6	1	1	12.6	0.65																				6
DEF3_HUMAN	Neutrophil defensin 3 precursor	IMAC	10587		34	34			4	4	0.38	4	1	1	37.8		4
DEN4C_HUMAN	DENN domain-containing protein 4C	CM	188681	6.41	22	22	2.4	2.4	4	4	0.02	4	1	1	4.4	0.55
DEPD5_HUMAN	DEP domain-containing protein 5	CM	179562	6.27	16	16	2.1	2.1	3	3	0.02	3	1	1	5.6	0.38
DESM_HUMAN	Desmin	IMAC	53592	5.21	44	44	14.9	14.9	6	6	0.07	6	1	1	5.6	2.66												6
DESP_HUMAN	Desmoplakin	CM / IMAC	334223	6.44	42	55	6.9	14.8	19.9	48	0.03	139	7	7	3	4.93		15										24					48						14
DGKH_HUMAN	Diacylglycerol kinase eta	CM	136861	6.11	16	16	4.7	4.7	4	4		4	1	1	4.7	1													4
DI3L1_HUMAN	DIS3-like exonuclease 1	CM	122269	6.09	31	31	3.8	4.9	4.5	5	0.03	9	2	2	8.2	0.6			4
DIAC_HUMAN	Di-N-acetylchitobiase precursor	CM	44444	6.19	28	28	7.5	7.5	2	2	0.08	2	1	1	22.5	0.33
DMD_HUMAN	Dystrophin	IMAC	428740	5.65	17	17	3.7	3.7	14	14	0.01	14	1	1	2.1	1.76																				14
DNAS1_HUMAN	Deoxyribonuclease-1 precursor	CM	31662	4.71	34	54	14.1	22	2.5	4	0.19	10	9	9	37.9	0.58			4					2									1														1
DNJC3_HUMAN	DnaJ homolog subfamily C member 3	CM	58036	5.83	19	19	3.6	3.6	2	2	0.06	2	1	1	14.3	0.25
DNL1_HUMAN	DNA ligase 1	IMAC	102362	5.49	17	17	5	5	5	5	0.04	5	1	1	14.7	0.34																		5
DNL4_HUMAN	DNA ligase 4	IMAC	103971	8.17	20	20	2.6	2.6	3	3		3	1	1	2.4	1.08										3
DNS2A_HUMAN	Deoxyribonuclease-2-alpha precursor	CM	40094	8.3	22	24	4.3	5.3	1.5	2	0.09	3	2	1	24.9	0.21
DOCK3_HUMAN	Dedicator of cytokinesis protein 3	IMAC	235154	6.52	25	25	4.1	4.1	10	10	0.02	10	1	1	1.3	3.15												10
DOK7_HUMAN	Protein Dok-7	IMAC	53838	6.43	34	36	5.15	6.7	3	3	0.07	3	2	2	5.6	1.2												3
DOP1_HUMAN	Protein dopey-1	CM	279576		15	15			12	12	0.01	12	1	1	3																																12
DOPD_HUMAN	D-dopachrome decarboxylase	IMAC	12826	6.71	37	61	25.4333	37.3	4	7	0.31	12	4	3	70.2	0.53																				1									7
DPOA2_HUMAN	DNA polymerase subunit alpha B	CM	66803	5.13	20	24	5.85	6.9	3.5	4	0.06	7	2	2	12.4	0.56
DPOE1_HUMAN	DNA polymerase epsilon catalytic subunit A	CM	264196	5.98	31	31	1.5	1.5	9	9		9	1	1	2.6	0.58
DPP2_HUMAN	Dipeptidyl-peptidase 2 precursor	CM	54783	5.91	21	29	5.1	5.1	3	4	0.07	6	3	3	21.9	0.23								4						2
DSC1_HUMAN	Desmocollin-1 precursor	CM / IMAC	101470	5.25	43	93	5.65	11.4	5.3	10	0.04	21	5	5	9.9	1.15												10					6															1
DSC2_HUMAN	Desmocollin-2 precursor	CM	101387	5.19	24	27	8.3	8.3	7	9	0.04	14	2	2	11.8	0.7																	9															5
DSG1_HUMAN	Desmoglein-1 precursor	CM / IMAC	114741	4.9	55	131	7.0875	13.2	7.2	14	0.09	43	10	9	8.7	1.52												14					10			2			5
DVL3_HUMAN	Segment polarity protein dishevelled homolog DVL-3	CM	78055	6.18	16	16	4.5	4.5	4	4		4	1	1	10.6	0.42																																4
DYH8_HUMAN	Ciliary dynein heavy chain 8	CM / IMAC	518309	5.95	17	19	1.4	1.4	9.7	14	0.01	29	3	3	1.9	0.74
DYH9_HUMAN	Ciliary dynein heavy chain 9	CM	515976	5.65	13	13	2	2	13	13	0.01	13	1	1	1.1	1.82																									13
DYL2_HUMAN	Dynein light chain 2, cytoplasmic	CM / IMAC	10464	6.81	22	24	25.8	25.8	2.5	4	0.38	5	2	2	114.7	0.22								1										4
E2AK1_HUMAN	Eukaryotic translation initiation factor 2-alpha kinase 1	CM	71676	5.68	16	16	1.6	1.6	16	16		16	1	1	9.8	0.16
E41LB_HUMAN	Band 4.1-like protein 4B	CM	101803	8.76	14	14	2.7	2.7	3	3	0.04	3	1	1	6.4	0.42
EAA4_HUMAN	Excitatory amino acid transporter 4	CM	61679	9.26	35	35	4.6	4.6	9	9	0.06	9	1	1	10.5	0.44															9
EBP2_HUMAN	Probable rRNA-processing protein EBP2	CM	34909	10.1	27	27	7.5	7.5	2	2	0.11	2	1	1	28.6	0.26			2
ECM1_HUMAN	Extracellular matrix protein 1 precursor	IMAC	62271	6.25	29	35	2.6	2.6	2	3	0.06	4	2	2	14.5	0.18																	3			1
ECP_HUMAN	Eosinophil cationic protein precursor	CM / IMAC	18899	10.12	25	29	12.2	16.9	1.5	2	0.2	3	2	2	79.4	0.21																		2													1
EDRF1_HUMAN	Erythroid differentiation-related factor 1	CM	139896		14	14			2	2	0.03	2	1	1	2.1
EF1A1_HUMAN	Elongation factor 1-alpha 1	CM / IMAC	50483	9.1	31	46	6.4	10.6	4.5	7	0.07	18	5	5	23.8	0.45												6																		7		2
EF1A2_HUMAN	Elongation factor 1-alpha 2	CM / IMAC	50812	9.11	35	46	4.15	4.8	3.5	5	0.07	7	3	3	23.6	0.2												5
EFCB5_HUMAN	EF-hand calcium-binding domain-containing protein 5	CM	174386		15	15			5	5	0.02	5	1	1	6.9																		5
EFNB1_HUMAN	Ephrin-B1 precursor	CM	38406	9.1	31	31	10.7	10.7	2	2	0.1	2	1	1	21.6	0.5
EGF_HUMAN	Pro-epidermal growth factor precursor	CM / IMAC	137653	5.56	30	40	4.15	8.5	5.8	11	0.04	46	12	10	8.7	0.98			4					11						2														6
EHBP1_HUMAN	EH domain-binding protein 1	CM	140571		13	13			7	7	0.03	7	1	1	5.9																																7
EHD2_HUMAN	EH domain-containing protein 2	CM	61332	6.03	17	17	6.1	6.1	4	4	0.06	4	1	1	16.3	0.37																				4
EI2BA_HUMAN	Translation initiation factor eIF-2B subunit alpha	CM / IMAC	33997	6.9	17	18	9.5	9.5	2.5	3	0.11	5	2	2	26.5	0.36																		2
EIF3B_HUMAN	Eukaryotic translation initiation factor 3 subunit B	CM	92890		21	21			1	1	0.04	1	1	1	12.9																		1
ELNE_HUMAN	Leukocyte elastase precursor	IMAC	29145	9.71	50	58	9.7	15.7	3	5	0.21	6	2	1	51.5	0.3																		5
EMIL2_HUMAN	EMILIN-2 precursor	IMAC	116870	5.99	20	20	4.3	4.3	5	5	0.03	5	1	1	2.6	1.65												5
ENAM_HUMAN	Enamelin precursor	CM	129143	6.48	22	22	6	6	9	9	0.03	9	1	1	3.5	1.71
ENDD1_HUMAN	Endonuclease domain-containing 1 protein precursor	CM	55758	5.55	26	27	6.9	8	3.5	4	0.07	7	2	2	17.9	0.45			4
ENL_HUMAN	Protein ENL	IMAC	62455	8.75	17	17	5.9	5.9	4	4	0.06	4	1	1	22.4	0.26				4
ENO1B_HUMAN	Alpha-enolase, lung specific	CM / IMAC	49876	5.78	43	62	13.65	15.7	6.5	9	0.12	13	2	2	14	1.12												4																			9
ENOA_HUMAN	Alpha-enolase	CM / IMAC	47511	7.01	51	196	13.4	25.6	6.9	12	0.21	69	20	15	25.3	1.01								10				10		4			2			6									2		11	5
ENOB_HUMAN	Beta-enolase	CM / IMAC	47329	7.59	50	101	12.45	17.7	4	6	0.17	20	11	11	25.4	0.7								4				6		2			2			2											3
ENOG_HUMAN	Gamma-enolase	CM / IMAC	47610	4.91	49	132	7.1	9.9	2	3	0.12	6	10	9	25.2	0.39												3		2			2			3											3	1
ENOX1_HUMAN	Ecto-NOX disulfide-thiol exchanger 1	CM	73861	5.4	18	18	3.1	3.1	3	3	0.05	3	1	1	13.5	0.23
ENTP7_HUMAN	Ectonucleoside triphosphate diphosphohydrolase 7	IMAC	69587	7.29	19	19	1.2	1.2	2	2	0.05	2	1	1	20.1	0.06
EPHB1_HUMAN	Ephrin type-B receptor 1 precursor	CM	111367	6.03	16	16	2.4	2.4	1	1	0.03	1	1	1	4	0.6
EPMIP_HUMAN	EPM2A-interacting protein 1	CM	70370	5.77	18	18	0.8	0.8	1	1		1	1	1	6.4	0.13
EPN4_HUMAN	Clathrin interactor 1	CM	68316	6.01	21	27	3	3	2	2	0.05	2	2	2	10.3	0.29		2
EPS8_HUMAN	Epidermal growth factor receptor kinase substrate 8	CM	92223	7.1	21	21	13.5	13.5	9	9	0.04	9	1	1	10.8	1.25
ERBB2_HUMAN	Receptor tyrosine-protein kinase erbB-2 precursor	CM / IMAC	141275	5.58	32	32	3.9	3.9	5.5	6	0.03	11	2	2	4.6	0.85															5		6
ERG7_HUMAN	Lanosterol synthase	CM	84506	6.16	18	18	7.5	7.5	4	4	0.04	4	1	1	11.8	0.64
ERP29_HUMAN	Endoplasmic reticulum protein ERp29 precursor	CM	29050	6.77	27	27	11.1	11.1	5	5	0.13	5	1	1	24.1	0.46																															5
ETBR2_HUMAN	Endothelin B receptor-like protein 2 precursor	IMAC	52771	6.97	16	16	3.5	3.5	7	7		7	1	1	5.7	0.61
EVPL_HUMAN	Envoplakin	CM	23292	6.56	27	27	1.5	1.5	6	6		6	1	1	27.9	0.05																			6
EXO3L_HUMAN	Exocyst complex component 3-like protein	CM	82217	5.44	18	18	4.2	4.2	4	4	0.05	4	1	1	10.1	0.42
EZRI_HUMAN	Ezrin	CM / IMAC	69526	5.94	26	27	9.2	9.2	9	11	0.05	18	2	2	12.9	0.71																		7													11
F135A_HUMAN	Protein FAM135A	CM	171720	5.22	30	30	4.4	4.4	6	6	0.02	6	1	1	3.8	1.16													6
F16P1_HUMAN	Fructose-1,6-bisphosphatase 1	CM / IMAC	37213	6.54	29	42	11.1333	14.5	6.3	10	0.22	25	6	6	32.2	0.45								10						4															6		5
FA65A_HUMAN	Protein FAM65A	CM	133504	5.87	19	19	2	2	3	3	0.03	3	1	1	6.2	0.32
FA81B_HUMAN	Protein FAM81B	CM	47897	7.72	18	18	5.1	5.1	2	2	0.08	2	1	1	11.5	0.44
FABPH_HUMAN	Fatty acid-binding protein, heart	CM	14915	6.29	21	21	15.8	15.8	5	5	0.26	5	1	1	67	0.24
FABPL_HUMAN	Fatty acid-binding protein, liver	CM	14265		18	18			1	1	0.27	1	1	1	84.1																		1
FAM3B_HUMAN	Protein FAM3B precursor	CM	26324	8.97	16	16	3.8	3.8	1	1		1	1	1	24.7	0.15													1
FANCI_HUMAN	Fanconi anemia group I protein	CM	150818	6.31	15	15	1.9	1.9	2	2	0.02	2	1	1	5.5	0.35
FANCJ_HUMAN	Fanconi anemia group J protein	CM	142873	6.49	20	20	3.5	3.5	4	4	0.03	4	1	1	7	0.5																				4
FBLN3_HUMAN	EGF-containing fibulin-like extracellular matrix protein 1 precursor	CM	56922	4.95	31	36	5.7	6.9	2.5	3	0.11	5	3	3	17.6	0.39																														2
FBLN5_HUMAN	Fibulin-5 precursor	CM	52519		25	25			4	4	0.07	4	1	1	22.8																		4
FBLN7_HUMAN	Fibulin-7 precursor	CM	49087	7.88	24	24	4.3	4.3	2	2	0.08	2	1	1	20.4	0.21			2
FBXL6_HUMAN	F-box/LRR-repeat protein 6	IMAC	59671	9.51	39	39	15	15	14	14	0.06	14	1	1	5	3												14
FCG3A_HUMAN	Low affinity immunoglobulin gamma Fc region receptor III-A precursor	CM	29374	8.2	18	18	3.9	3.9	1	1	0.13	1	1	1	34	0.11
FCGBP_HUMAN	IgGFc-binding protein precursor	CM / IMAC	596880	5.12	26	28	1.6	1.6	7	8	0.01	14	2	2	1.4	1.14	6																														8
FGR_HUMAN	Proto-oncogene tyrosine-protein kinase FGR	IMAC	60106		22	22			3	3	0.06	3	1	1	6.7
FHOD3_HUMAN	FH1/FH2 domain-containing protein 3	CM	158613	5.72	19	19	2.1	2.1	2	2		2	1	1	5.2	0.4
FIBA_HUMAN	Fibrinogen alpha chain precursor [Contains: Fibrinopeptide A]	CM / IMAC	95714	5.7	35	64	5.74	8.3	10.3	18	0.08	82	11	10	12.5	0.66								15						7			16											7	6		18
FIBB_HUMAN	Fibrinogen beta chain precursor [Contains: Fibrinopeptide B]	CM / IMAC	56612	8.54	45	71	15.7	15.7	6.7	11	0.11	20	4	4	21.2	0.74								2				7
FIBG_HUMAN	Fibrinogen gamma chain precursor	CM	52139		29	31			5.7	10	0.11	17	3	3	23									6
FIGN_HUMAN	Fidgetin	CM	82659	6.24	23	23	6.1	6.1	4	4	0.04	4	1	1	12.1	0.5																															4
FINC_HUMAN	Fibronectin precursor	CM / IMAC	266198	5.45	34	61	3.26667	4.6	8.8	15	0.03	53	9	7	4.5	1.02			9														15			5									6			9
FKB1A_HUMAN	FK506-binding protein 1A	IMAC	12008	7.88	52	52	25	25	3	3	0.77	3	1	1	75	0.33																													3
FKBP2_HUMAN	FK506-binding protein 2 precursor	IMAC	15649		15	15			3	3		3	1	1	25.6		3
FLNA_HUMAN	Filamin-A	CM / IMAC	283474	5.7	28	38	3.95	7.7	10.5	18	0.02	63	10	8	5.3	1.45			8															18		6									6
FLNB_HUMAN	Filamin-B	CM	280360	5.49	16	16	2.75	4.5	5.5	8	0.01	11	2	2	3.6	1.25
FLNC_HUMAN	Filamin-C	CM / IMAC	293523	5.68	28	49	3.7	4.4	9.7	16	0.01	68	7	6	4.1	1.07			10									12					16			9											7
FLVC1_HUMAN	Feline leukemia virus subgroup C receptor-related protein 1	CM	60319	5.72	15	15	4.3	4.3	1	1	0.06	1	1	1	13.8	0.31
FMR1_HUMAN	Fragile X mental retardation 1 protein	CM / IMAC	71516	6.99	18	20	7.75	8.9	19.5	21	0.05	39	2	2	9.8	0.91
FN3K_HUMAN	Fructosamine-3-kinase	CM	35399		17	17			1	1	0.11	1	1	1	33.9
FNBP1_HUMAN	Formin-binding protein 1	CM / IMAC	71762	5.53	27	30	2.65	4.5	8	14		32	4	4	12.5	0.36				8			4					14
FOG1_HUMAN	Zinc finger protein ZFPM1	CM	106200		14	14			7	7	0.03	7	1	1	11.3
FOG2_HUMAN	Zinc finger protein ZFPM2	CM	130383	6.03	22	22	2.3	2.3	2	2	0.03	2	1	1	6.4	0.36
FOSL1_HUMAN	Fos-related antigen 1	IMAC	29755	8.21	16	16	5.5	5.5	5	5	0.13	5	1	1	47.1	0.12
FOSL2_HUMAN	Fos-related antigen 2	IMAC	35364	7.03	16	16	3.1	3.1	5	5		5	1	1	39.6	0.08
FOXK1_HUMAN	Forkhead box protein K1	CM	75913	9.41	18	18	6.4	6.4	5	5	0.05	5	1	1	9.2	0.7
FOXK2_HUMAN	Forkhead box protein K2	CM	69289	9.57	18	18	5.9	5.9	4	4	0.05	4	1	1	10.1	0.58
FOXN3_HUMAN	Forkhead box protein N3	CM	54348	6.19	15	15	3.3	3.3	1	1	0.07	1	1	1	8.3	0.4												1
FOXR2_HUMAN	Forkhead box protein R2	CM	36609	4.92	26	26	5.5	5.5	1	1	0.1	1	1	1	17.8	0.31																											1
FREM2_HUMAN	FRAS1-related extracellular matrix protein 2 precursor	IMAC	352807	4.89	38	38	2.1	2.1	7	7	0.01	7	1	1	0.9	2.33
FREM3_HUMAN	FRAS1-related extracellular matrix protein 3 precursor	CM	238674		13	13			7	7	0.02	7	1	1	1.3			7
FRIL_HUMAN	Ferritin light chain	CM	20076	5.51	28	33	12.7667	17.1	2	3	0.19	6	4	3	49.8	0.34												1																			1	3
FXL14_HUMAN	F-box/LRR-repeat protein 14	CM	45886		17	17			2	2		2	1	1	6.5
FYCO1_HUMAN	FYVE and coiled-coil domain-containing protein 1	CM	168664	4.85	18	18	7.3	7.3	9	9	0.02	9	1	1	5.9	1.24
FZD8_HUMAN	Frizzled-8 precursor	CM	74840		16	16			4	4	0.05	4	1	1	16															4
G2E3_HUMAN	G2/M phase-specific E3 ubiquitin-protein ligase	CM / IMAC	82671	7.9	17	18	5.8	5.8	2	3	0.04	4	2	2	7.9	0.73													3
G3P_HUMAN	Glyceraldehyde-3-phosphate dehydrogenase	CM / IMAC	36224	8.57	32	66	10.8429	23	4.6	9	0.16	37	16	13	38.6	0.6		1										6		2			4										1		2		9	3
G6PI_HUMAN	Glucose-6-phosphate isomerase	CM	63375	8.43	68	90	11.9	15.6	7	10	0.16	14	2	1	15.8	0.99																															10
GALM_HUMAN	Aldose 1-epimerase	CM	37993	6.18	16	16	2.9	2.9	1	1	0.1	1	1	1	26.3	0.11												1
GALT6_HUMAN	Polypeptide N-acetylgalactosaminyltransferase 6	CM / IMAC	71159	8.47	23	26	3.95	6.3	10	16	0.05	20	2	2	14.1	0.45																				4
GALT8_HUMAN	Probable polypeptide N-acetylgalactosaminyltransferase 8	CM	73478	9.02	15	15	3.3	3.3	1	1	0.05	1	1	1	13.6	0.24
GBP4_HUMAN	Guanylate-binding protein 4	CM	73677	5.73	17	17	6.7	8.9	6.5	7	0.05	13	2	2	13.6	0.65													6							7
GBP7_HUMAN	Guanylate-binding protein 7	IMAC	73152	5.72	16	16	2.5	2.5	5	5	0.05	5	1	1	19.1	0.13
GBRR2_HUMAN	Gamma-aminobutyric acid receptor subunit rho-2 precursor	CM	54436	9.27	16	16	3.2	3.2	1	1	0.07	1	1	1	18.4	0.17
GCA14_HUMAN	Protein GCAP14 homolog	CM	94231	6.4	16	16	2.8	2.8	3	3		3	1	1	6.9	0.41													3
GCP3_HUMAN	Gamma-tubulin complex component 3	CM	104369	8.35	21	21	4	4	4	4	0.04	4	1	1	9.6	0.42
GDF15_HUMAN	Growth/differentiation factor 15 precursor	CM / IMAC	34681	9.79	35	57	9.85	14.3	2.5	4	0.17	10	35	28	43.3	0.33			2	1			1	3					1	4				2		1	4						1	3	2	2		2
GDIB_HUMAN	Rab GDP dissociation inhibitor beta	CM	51119	6.11	36	36	10.3	10.3	3	3	0.07	3	1	1	16.2	0.64																															3
GDIR_HUMAN	Rho GDP-dissociation inhibitor 1	CM	23264	5.02	24	24	7.4	7.4	1	1	0.16	1	1	1	27.9	0.27
GDNF_HUMAN	Glial cell line-derived neurotrophic factor precursor	CM / IMAC	23720	9.26	23	26	2.4	2.4	3	5		6	2	2	42.2	0.06																				1
GELS_HUMAN	Gelsolin precursor	CM / IMAC	86096	5.9	55	118	8.84444	16	6.9	12	0.16	76	40	28	17.4	0.92			10					10					8	8			11	12		5	4			3		6		3	6	4	11	8
GFAP_HUMAN	Glial fibrillary acidic protein	CM / IMAC	49937	5.42	28	61	9.06	12.7	4	6	0.07	20	14	12	20	0.64					3				4			5						3		5	4	6	2						6
GFRP_HUMAN	GTP cyclohydrolase 1 feedback regulatory protein	CM / IMAC	9755	6.08	43	80	41.6667	70.2	4	7	1.08	28	29	25	123	0.57			2					4					4	2			5	3		3		3				3	6		1		1	2	1
GGH_HUMAN	Gamma-glutamyl hydrolase precursor	CM / IMAC	36363	6.67	25	50	14	19.2	3.8	6	0.16	15	6	6	33	0.58																	6															3
GGT1_HUMAN	Gamma-glutamyltranspeptidase 1 precursor	IMAC	61752	6.65	36	45	2.3	2.3	1	1	0.06	1	3	2	14.6	0.16																					1							1
GGTL2_HUMAN	Gamma-glutamyltransferase-like protein 2	IMAC	23209		36	45	2.3	2.3	1	1		1	3	2	38.8	0.06																					1							1
GGTL4_HUMAN	Gamma-glutamyltransferase-like protein 4	IMAC	24221		36	45	2.3	2.3	1	1		1	3	2	37.2	0.06																					1							1
GIMA2_HUMAN	GTPase IMAP family member 2	CM	38987	8.6	19	19	3.6	3.6	1	1	0.1	1	1	1	25.6	0.14
GLB1L_HUMAN	Beta-galactosidase-1-like protein precursor	CM / IMAC	74442	9.01	22	28	2.2	2.6	2.5	3	0.05	5	3	3	12.1	0.21																					2
GLRX1_HUMAN	Glutaredoxin-1	CM / IMAC	12061	8.33	34	48	14.375	19.8	2.5	4	0.55	10	5	5	99.5	0.2			1															2											4
GLYG_HUMAN	Glycogenin-1	IMAC	39726	5.27	35	35	11.1	11.1	3	3	0.09	3	1	1	37.8	0.29																		3
GNAS1_HUMAN	Guanine nucleotide-binding protein G(s) subunit alpha isoforms XLas	CM	111765	4.91	14	14	1.9	1.9	2	2		2	1	1	8.9	0.21
GNPAT_HUMAN	Dihydroxyacetone phosphate acyltransferase	CM	77986	6.16	16	16	2.1	2.1	1	1	0.05	1	1	1	12.8	0.16																				1
GOG8B_HUMAN	Golgin subfamily A member 8B	IMAC	67962	6.46	16	16	2.5	2.5	5	5		5	1	1	20.6	0.12
GOGA2_HUMAN	Golgin subfamily A member 2	IMAC	112285	4.97	16	16	1.8	1.8	6	6		6	1	1	12.5	0.14
GOGA5_HUMAN	Golgin subfamily A member 5	IMAC	83024	5.6	17	17	2.9	2.9	3	3		3	1	1	10.8	0.27																				3
GOGA6_HUMAN	Golgin subfamily A member 6	IMAC	80200	5.34	15	16	1.2	1.2	6	7	0.05	12	2	2	17.5	0.07
GP101_HUMAN	Probable G-protein coupled receptor 101	CM	57514	5.51	17	17	4.1	4.1	2	2	0.06	2	1	1	17.4	0.24
GP124_HUMAN	Probable G-protein coupled receptor 124 precursor	CM	144299	8.76	21	21	6.8	6.8	10	10		10	1	1	6.9	0.99
GP135_HUMAN	Probable G-protein coupled receptor 135	CM	52591	9.88	32	32	1.4	1.4	5	5	0.07	5	1	1	10.5	0.13
GP152_HUMAN	Probable G-protein coupled receptor 152	CM	51703	4.59	19	19	6.2	6.2	2	2	0.07	2	1	1	19.3	0.32
GPR83_HUMAN	Probable G-protein coupled receptor 83 precursor	CM	48955		19	19			2	2	0.08	2	1	1	24.5															2
GPSM2_HUMAN	G-protein-signaling modulator 2	CM	76586	6.09	16	16	5.2	5.2	3	5	0.05	6	2	2	5.9	0.88																						1
GPVI_HUMAN	Platelet glycoprotein VI precursor	CM	37379	9.49	27	37	9.1	9.1	3.5	4	0.16	7	2	2	32.1	0.28
GPX3_HUMAN	Glutathione peroxidase 3 precursor	CM	25790		24	24			4	4	0.15	4	1	1	46.5																		4
GRDN_HUMAN	Girdin	IMAC	216724	5.9	17	17	3.1	3.1	9	9	0.02	9	1	1	4.2	0.74																				9
GRM1_HUMAN	Metabotropic glutamate receptor 1 precursor	CM / IMAC	134248	6.27	17	17	3.2	3.2	4	5	0.03	8	2	2	8.9	0.36																	3			5
GRM1C_HUMAN	GRAM domain-containing protein 1C	CM	76320	6.81	21	21	3.2	3.2	4	4		4	1	1	13.1	0.24
GRM5_HUMAN	Metabotropic glutamate receptor 5 precursor	IMAC	134636	8.07	17	17	2.1	2.1	5	5	0.03	5	1	1	6.7	0.31																				5
GRM8_HUMAN	Metabotropic glutamate receptor 8 precursor	CM	103337	8.49	16	16	1.4	1.4	2	2	0.04	2	1	1	6.3	0.22															2
GSE1_HUMAN	Genetic suppressor element 1	IMAC	136447	7.36	21	21	1.2	1.2	5	5	0.03	5	1	1	2.2	0.55									5
GSTA1_HUMAN	Glutathione S-transferase A1	CM	25688	8.91	26	26	15.8	15.8	5	5	0.15	5	1	1	38.9	0.41
GSTA3_HUMAN	Glutathione S-transferase A3	CM	25358	9.21	26	26	18	18	5	5	0.15	5	1	1	39.4	0.46
GSTP1_HUMAN	Glutathione S-transferase P	CM / IMAC	23584	5.43	51	110	16.46	31.4	4	7	0.36	28	16	13	63.6	0.49								7					1	5				2		1									2		4
GTR9_HUMAN	Solute carrier family 2, facilitated glucose transporter member 9	CM	58702	9.16	16	16	0.9	0.9	6	6		6	1	1	14.1	0.06																				6
GUC2B_HUMAN	Guanylate cyclase activator 2B precursor [Contains: Guanylate cyclase C-activating peptide 2	CM	12468	6.02	34	35	15.2	18.8	3	5	0.32	6	2	2	80.2	0.23																															1	5
GUC2F_HUMAN	Retinal guanylyl cyclase 2 precursor	CM	125848	6.77	14	14	2.2	2.2	3	3		3	1	1	4.4	0.5
H10_HUMAN	Histone H1.0	IMAC	20863	10.84	43	43	30.4	30.4	12	12	0.18	12	1	1	43.1	0.71																		12
H12_HUMAN	Histone H1.2	CM	21364	10.94	36	54	17.0667	18.8	7.5	11	0.29	30	4	3	56.2	0.33								11																							8	6
H13_HUMAN	Histone H1.3	CM	22350	11.02	36	54	21.8667	22.6	9.5	12	0.27	38	4	3	53.7	0.42								11																							12	6
H14_HUMAN	Histone H1.4	CM	21865	11.03	36	54	16.4333	23.3	8.3	12	0.28	25	4	3	54.9	0.42								12																							8	5
H2A1_HUMAN	Histone H2A type 1	CM	14091		28	32	11.5333	16.2	2.3	4		7	3	3	71	0.23													2							4
H2A1A_HUMAN	Histone H2A type 1-A	CM / IMAC	14233	10.86	29	32	12.7333	19.8	2.3	4	0.28	7	4	4	70.3	0.28													2					4		4
H2A1B_HUMAN	Histone H2A type 1-B	CM / IMAC	14135	11.05	28	32	16.15	30	2.5	4	0.28	10	4	3	70.7	0.42													2							4
H2A1C_HUMAN	Histone H2A type 1-C	CM / IMAC	14105		28	32	16.1333	30	2	3		6	3	3	70.9	0.42													2							3
H2A1D_HUMAN	Histone H2A type 1-D	CM	14107		28	32	11.5333	16.2	2.3	4		7	3	3	70.9	0.23													2							4
H2A1E_HUMAN	Histone H2A type 1-E	CM / IMAC	14135		28	32	16.15	30	2.5	4		10	4	3	70.7	0.42													2							4
H2A1H_HUMAN	Histone H2A type 1-H	CM	13906		28	32	11.5333	16.2	2.3	4		7	3	3	71.9	0.23													2							4
H2A1J_HUMAN	Histone H2A type 1-J	CM	13936		28	32	11.5333	16.2	2.3	4		7	3	3	71.8	0.23													2							4
H2A2A_HUMAN	Histone H2A type 2-A	CM	14095		28	32	9.2	11.5	1.5	2		3	2	2	70.9	0.16													2
H2A2B_HUMAN	Histone H2A type 2-B	CM	13995	10.88	28	32	11	14.6	2	3	0.28	6	4	4	85.7	0.17													2																		3
H2A2C_HUMAN	Histone H2A type 2-C	CM	13988	10.9	28	32	11.5667	16.3	2.3	4	0.28	7	3	3	71.5	0.23													2							4
H2A3_HUMAN	Histone H2A type 3	CM / IMAC	14121		28	32	16.1333	30	2	3		6	3	3	70.8	0.42													2							3
H2AV_HUMAN	Histone H2AV	CM / IMAC	13509	10.58	27	30	13.7333	19.5	2.3	4	0.29	7	4	4	74	0.26																	2			4											4
H2AX_HUMAN	Histone H2A.x	CM / IMAC	15144	10.74	27	32	11.5	16.1	2	3	0.26	6	4	4	79.2	0.2													2							3
H2AY_HUMAN	Core histone macro-H2A.1	CM	39788		17	17			1	1	0.09	1	1	1	30.2									1
H2AZ_HUMAN	Histone H2A.Z	CM / IMAC	13553		27	30	13.7333	19.5	2.3	4		7	4	4	73.8	0.26																	2			4											4
H2B1B_HUMAN	Histone H2B type 1-B	IMAC	13950		28	28			4	4		4	1	1	28.7																			4
H2B1C_HUMAN	Histone H2B type 1-C/E/F/G/I	IMAC	13819		28	28			4	4	0.29	4	1	1	28.9																			4
H2B1J_HUMAN	Histone H2B type 1-J	IMAC	13904		28	28			4	4		4	1	1	28.8																			4
H2B1K_HUMAN	Histone H2B type 1-K	IMAC	13890		28	28			4	4		4	1	1	28.8																			4
H2B1L_HUMAN	Histone H2B type 1-L	IMAC	13952		28	28			4	4	0.28	4	1	1	28.7																			4
H2B1M_HUMAN	Histone H2B type 1-M	IMAC	13989		28	28			4	4	0.28	4	1	1	28.6																			4
H2B1N_HUMAN	Histone H2B type 1-N	IMAC	13922		28	28			4	4	0.28	4	1	1	28.7																			4
H2B2E_HUMAN	Histone H2B type 2-E	IMAC	13920		28	28			4	4		4	1	1	28.7																			4
H2BFS_HUMAN	Histone H2B type F-S	IMAC	13944		28	28			4	4		4	1	1	28.7																			4
H31_HUMAN	Histone H3.1	CM / IMAC	15518	11.13	44	49	12.5	16.9	3	5	0.25	9	4	3	77.3	0.22								5												3											3
H31T_HUMAN	Histone H3.1t	CM / IMAC	15622	11.13	44	49	13.975	18.4	3	5	0.25	9	5	3	76.8	0.24								5												5											3
H32_HUMAN	Histone H3.2	CM / IMAC	15445		44	49	12.5	16.9	3	5		9	4	3	77.7	0.22								5												3											3
H33_HUMAN	Histone H3.3	CM / IMAC	15385		46	49	12.5	16.9	2	3		4	3	2	65	0.26																				3											3
H3L_HUMAN	Histone H3-like	CM	15328	11.1	49	49	5.2	5.2	1	1	0.25	1	1	1	45.7	0.11																															1
H4_HUMAN	Histone H4	CM / IMAC	11367	11.36	43	62	38.35	53.4	6.3	10	0.88	38	6	4	88	0.61																		3													10
HBA_HUMAN	Hemoglobin subunit alpha	CM / IMAC	15314	8.72	35	116	23.7429	29.6	6	15	1.17	60	17	16	78.4	0.38	2	6	3		8			9	8				5					2								5
HBAZ_HUMAN	Hemoglobin subunit zeta	CM	15694		22	22			6	6	0.25	6	1	1	76.5									6
HBB_HUMAN	Hemoglobin subunit beta	CM / IMAC	16112	6.75	42	108	32.3	59.2	5.3	12	0.91	48	38	29	86.9	0.68		2	6		6			7	3		3	1	8	8			8		1	3	7			1			7	4	4			1
HBD_HUMAN	Hemoglobin subunit delta	IMAC	16169		47	47			9	9	0.54	9	1	1	24.7
HBG1_HUMAN	Hemoglobin subunit gamma-1	IMAC	16197	6.64	40	46	28.2	36.7	3	4	0.24	6	2	2	18.5	1.98									4
HBG2_HUMAN	Hemoglobin subunit gamma-2	IMAC	16183	6.64	40	46	28.9	38.1	3	4	0.24	6	2	2	18.5	2.06									4
HCDH_HUMAN	Hydroxyacyl-coenzyme A dehydrogenase, mitochondrial precursor	CM	34334	8.88	24	31	2.05	2.5	1	1	0.11	1	2	2	24.2	0.1																																1
HD_HUMAN	Huntingtin	CM	351849	5.81	17	17	2.9	2.9	9	9	0.01	9	1	1	2.8	1.04																																9
HDAC3_HUMAN	Histone deacetylase 3	IMAC	49532		20	20			1	1	0.08	1	1	1	8.1																		1
HEBP2_HUMAN	Heme-binding protein 2	CM	22875		15	15			3	3	0.17	3	1	1	52.5																		3
HEMO_HUMAN	Hemopexin precursor	CM	52417		36	36			4	4	0.15	4	1	1	22.9																		4
HGFL_HUMAN	Hepatocyte growth factor-like protein precursor	CM	82886	7.98	22	22	5.2	5.2	2	2	0.04	2	1	1	12.1	0.43			2
HLX_HUMAN	H2.0-like homeobox protein	CM	50789	8.7	19	19	6.8	6.8	2	2		2	1	1	16.3	0.42
HMDH_HUMAN	3-hydroxy-3-methylglutaryl-coenzyme A reductase	CM	99073	6.33	20	20	3.8	3.8	3	3	0.04	3	1	1	10.1	0.38
HMG1X_HUMAN	High mobility group protein 1-like 10	IMAC	24389	6.99	16	16	10.9	10.9	3	3	0.16	3	1	1	36.9	0.3																		3
HMGB3_HUMAN	High mobility group protein B3	IMAC	23151	8.48	22	22	10	10	4	4	0.16	4	1	1	38.9	0.26																												4
HNRCL_HUMAN	Heterogeneous nuclear ribonucleoprotein C-like 1	CM	32199		42	42			3	3	0.12	3	1	1	37.3									3
HNRPC_HUMAN	Heterogeneous nuclear ribonucleoproteins C1/C2	CM	33727		46	49			5	6	0.11	10	2	2	35.6									4
HNRPD_HUMAN	Heterogeneous nuclear ribonucleoprotein D0	CM	38605		26	26			5	5	0.1	5	1	1	31.1									5
HORN_HUMAN	Hornerin	CM / IMAC	283299	10.05	34	66	4.4	5.3	11.3	13	0.04	34	3	3	3.2	1.66																	12	13
HPPD_HUMAN	4-hydroxyphenylpyruvate dioxygenase	IMAC	45105		14	14			3	3	0.08	3	1	1	8.9						3
HPT_HUMAN	Haptoglobin precursor [Contains: Haptoglobin alpha chain; Haptoglobin beta chain]	CM / IMAC	45889	6.13	36	112	9.425	12.3	9.6	24	0.25	77	11	11	30.5	0.4								21				4
HPTR_HUMAN	Haptoglobin-related protein precursor	CM / IMAC	39521	6.42	35	43	14.4	14.4	6	8	0.09	12	2	2	30.4	0.47												4
HRX_HUMAN	Zinc finger protein HRX	CM	436324	9.22	17	17	5.6	5.6	24	24	0.01	24	1	1	2.3	2.43																																24
HS12A_HUMAN	Heat shock 70 kDa protein 12A	CM	75263		23	23			4	4	0.05	4	1	1	15.9
HS71L_HUMAN	Heat shock 70 kDa protein 1L	CM / IMAC	70774	5.76	40	64	5.5	8	3.7	6	0.11	11	3	3	17	0.47												6																			2
HSP71_HUMAN	Heat shock 70 kDa protein 1	CM / IMAC	70337	5.48	30	64	6.775	14.5	4.2	9	0.11	25	8	7	17.1	0.85												6		4						2											3	1
HSP72_HUMAN	Heat shock-related 70 kDa protein 2	CM / IMAC	70305	5.56	25	34	4.3	5.2	3	4	0.05	6	2	2	14.2	0.37												4								2
HSP76_HUMAN	Heat shock 70 kDa protein 6	CM / IMAC	71484	5.81	25	34	5.95	8.9	4.5	7	0.05	9	2	2	14	0.64												7								2
HSP77_HUMAN	Putative heat shock 70 kDa protein 7	CM / IMAC	40472	7.72	25	34	7.65	12.3	3.5	5	0.09	7	2	2	24.7	0.5												5								2
HSP7C_HUMAN	Heat shock cognate 71 kDa protein	CM / IMAC	71125	5.37	34	50	5.65	8.8	7.7	16	0.08	23	3	3	16.9	0.52												5
HSPB1_HUMAN	Heat shock protein beta-1	CM / IMAC	22839	5.98	30	44	16.1625	25.4	3	5	0.37	15	15	10	61.3	0.41												3		4						5									3		1
HTRA1_HUMAN	Serine protease HTRA1 precursor	CM	51287	8.09	18	18	1	1	1	1		1	1	1	19.5	0.05
HTSF1_HUMAN	HIV Tat-specific factor 1	CM	86422	4.29	33	33	3	3	2	2	0.04	2	1	1	7.5	0.4
HUWE1_HUMAN	E3 ubiquitin-protein ligase HUWE1	CM	485822	5.1	16	16	1	1	3	3	0.01	3	1	1	1.1	0.91																								3
HV101_HUMAN	Ig heavy chain V-I region EU	CM	12586	6.4	33	49	17.3667	25.6	3	4	0.32	9	5	5	95.3	0.27														2													3				2
HV102_HUMAN	Ig heavy chain V-I region HG3 precursor	CM	13117		31	35			1.5	2	0.3	3	3	3	91.5															2			1
HV106_HUMAN	Ig heavy chain V-I region SIE	CM	13846		35	49	10.3	10.3	3	4	0.28	6	2	2	86.7	0.12																															2
HV107_HUMAN	Ig heavy chain V-I region Mot	CM / IMAC	13693	5.84	58	84	17.95	25.6	2	2	0.29	2	3	3	87.6	0.29												2		2																	2
HV301_HUMAN	Ig heavy chain V-III region TRO	CM / IMAC	13586	9.74	39	75	24.2	33.6	3.8	7	0.29	23	9	8	110.4	0.3								7				2						1			2								1		4
HV303_HUMAN	Ig heavy chain V-III region VH26 precursor	CM	12753	8.49	28	45	9.4	9.4	3.7	8	0.31	11	4	4	94.1	0.1								8																								1
HV304_HUMAN	Ig heavy chain V-III region TIL	CM / IMAC	12470	9.24	33	53	23.4667	33	3.8	8	0.32	15	9	8	96.2	0.34			2					8									4												2			1
HV305_HUMAN	Ig heavy chain V-III region BRO	CM / IMAC	13341	6.45	43	98	23.34	34.2	5	14	0.49	35	30	24	112.4	0.3			3				1	14				2		4				2		1	3					1	3		5		4	1
HV306_HUMAN	Ig heavy chain V-III region BUT	CM	12493		41	41			5	5	0.32	5	1	1	96.1
HV307_HUMAN	Ig heavy chain V-III region CAM	CM	13782	9.65	26	45	9.2	9.4	3.8	9	0.29	15	5	5	87.1	0.11								9																								1
HV310_HUMAN	Ig heavy chain V-III region HIL	CM / IMAC	13680	9.43	24	34	20.9333	32.2	2.5	3	0.29	5	5	5	65.8	0.49												3																2	3		2
HV312_HUMAN	Ig heavy chain V-III region BUR	CM	13095		35	35			5	5	0.3	5	1	1	91.6																		5
HV313_HUMAN	Ig heavy chain V-III region POM	CM / IMAC	13067	8.05	32	41	22.2667	29.4	1.5	2	0.3	3	7	6	91.8	0.32			2																										2			1
HV315_HUMAN	Ig heavy chain V-III region WAS	CM / IMAC	13205	8.07	32	41	24.9	33.3	2	3	0.3	6	7	7	90.9	0.37			2																										3			1
HV316_HUMAN	Ig heavy chain V-III region TEI	CM / IMAC	12916	8.72	41	98	27.9	42	4.3	9	0.51	30	30	24	92.9	0.45			3				1	9				2		4						2	3					1			5		3	1
HV318_HUMAN	Ig heavy chain V-III region TUR	CM / IMAC	12545		32	41	18.7	20.9	1.5	2		3	6	6	95.7	0.22			2																										2			1
HV319_HUMAN	Ig heavy chain V-III region JON	CM	12677		39	39			3	3	0.31	3	1	1	94.7
HV320_HUMAN	Ig heavy chain V-III region GAL	CM / IMAC	12844	8.7	28	35	17.2	17.2	3.7	6	0.31	11	3	3	93.4	0.18														3						2
I11RA_HUMAN	Interleukin-11 receptor alpha chain precursor	CM	45792	8.03	14	14	5.9	5.9	2	2	0.08	2	1	1	21.8	0.27
IBP2_HUMAN	Insulin-like growth factor-binding protein 2 precursor	CM	36221	7.48	22	26	2.7	2.7	1.5	2	0.1	3	2	2	33.1	0.08																	2													1
IBP7_HUMAN	Insulin-like growth factor-binding protein 7 precursor	CM	30157	8.25	24	35	10.5	17	2.5	4	0.13	10	5	4	33.2	0.51																															1
IC1_HUMAN	Plasma protease C1 inhibitor precursor	CM	55382	6.09	28	39	5.16	7.6	3.5	6	0.11	21	8	6	21.7	0.35								5					1
ICAL_HUMAN	Calpastatin	CM	76971	4.98	14	14	1.8	1.8	3	3		3	1	1	13	0.14
IDHC_HUMAN	Isocitrate dehydrogenase [NADP] cytoplasmic	CM / IMAC	46944	6.53	31	40	12.1	12.1	4.3	6	0.13	13	3	3	25.6	0.47								6						3															4
IDHP_HUMAN	Isocitrate dehydrogenase [NADP], mitochondrial precursor	CM	51365		24	24			4	4	0.07	4	1	1	23.4									4
IF3M_HUMAN	Translation initiation factor IF-3, mitochondrial precursor	CM	31862	9.7	16	16	5	5	1	1	0.12	1	1	1	26	0.19																				1
IF5A1_HUMAN	Eukaryotic translation initiation factor 5A-1	CM	17060		18	18			2	2	0.23	2	1	1	70.3
IF5A2_HUMAN	Eukaryotic translation initiation factor 5A-2	CM	17135		18	18			2	2		2	1	1	70
IG2AS_HUMAN	Putative insulin-like growth factor 2 antisense gene protein	CM	18149	12.13	20	20	12.5	12.5	4	4	0.21	4	1	1	35.8	0.35
IGHA1_HUMAN	Ig alpha-1 chain C region	CM / IMAC	38510	6.08	43	103	11.2375	19	4.9	9	0.21	39	37	30	39	0.49	9		5		2		3	7				3					2	5			1					1			1	5	5	3
IGHA2_HUMAN	Ig alpha-2 chain C region	CM / IMAC	37307	5.71	40	73	9.95556	20.6	5.1	10	0.1	41	26	24	32.2	0.64	9		3		2		3										2	2			1					1			1		2	3
IGHG1_HUMAN	Ig gamma-1 chain C region	CM / IMAC	36619	8.46	48	140	19.9	37	10.4	23	0.49	177	72	48	41	0.9	6		7	3	3		2	15				18	12	18		2	9	13	1	21	15	1	1	2		6	11	10	23	3	6	4
IGHG2_HUMAN	Ig gamma-2 chain C region	CM / IMAC	36512	7.66	42	86	21.2632	30.7	11.6	25	0.43	198	28	23	41.1	0.75	9		10					20				8		14			6	17		13	11							8	16		6
IGHG3_HUMAN	Ig gamma-3 chain C region	CM / IMAC	33243	7.89	29	43	15.35	19	13	23	0.24	78	8	7	45.1	0.42								10				10					6	14		13									12
IGHG4_HUMAN	Ig gamma-4 chain C region	CM / IMAC	36454	7.18	42	72	18.73	24.8	5.6	10	0.22	45	20	18	38.4	0.65	4		4					8				7						6		7	7							5	7
IGSF8_HUMAN	Immunoglobulin superfamily member 8 precursor	CM	65661	8.23	21	25	4.96667	8.5	3.5	5	0.06	14	6	6	18.3	0.46																	3														4	2
IL1R2_HUMAN	Interleukin-1 receptor type II precursor	IMAC	45421	8.03	21	21	1.5	1.5	3	3		3	1	1	6.6	0.23									3
IL1RA_HUMAN	Interleukin-1 receptor antagonist protein precursor	CM	20397		41	41			3	3	0.19	3	1	1	58.8																		3
IL5RA_HUMAN	Interleukin-5 receptor alpha chain precursor	CM	48312	5.36	21	21	6	6	3	3		3	1	1	20.7	0.29
ILEU_HUMAN	Leukocyte elastase inhibitor	CM / IMAC	42855	5.9	34	67	13.2	21.4	4.4	9	0.14	22	7	5	35	0.61	1																	5													9
IMDH1_HUMAN	Inosine-5'-monophosphate dehydrogenase 1	IMAC	55805	6.44	32	32	5.6	5.6	3	3	0.07	3	1	1	5.4	1.04												3
IP6K3_HUMAN	Inositol hexaphosphate kinase 3	IMAC	46929	8.28	22	22	1.7	1.7	1	1	0.08	1	1	1	5.3	0.32																1
IPSP_HUMAN	Plasma serine protease inhibitor precursor	CM / IMAC	45815	9.3	27	39	13.4091	24.6	5.6	10	0.17	45	19	16	32.7	0.75			5					7									3	3		2
IQEC2_HUMAN	IQ motif and Sec7 domain-containing protein 2	IMAC	161736	8.78	16	16	2.2	2.2	11	11		11	1	1	1.9	1.16
IRAK3_HUMAN	Interleukin-1 receptor-associated kinase 3	CM	68893		17	17			3	3	0.05	3	1	1	17.4															3
IRK6_HUMAN	G protein-activated inward rectifier potassium channel 2	IMAC	48793	5.24	17	17	7.8	7.8	3	3	0.08	3	1	1	18.4	0.42																				3
IRS1_HUMAN	Insulin receptor substrate 1	CM	132788	8.83	22	22	0.8	0.8	6	6		6	1	1	3.4	0.24
ISCU_HUMAN	Iron-sulfur cluster assembly enzyme ISCU, mitochondrial precursor	CM	18165	9.54	18	18	12.6	12.6	1	1	0.21	1	1	1	35.8	0.35
ISK1_HUMAN	Pancreatic secretory trypsin inhibitor precursor	CM	8849		44	44			4	4	0.46	4	1	1	135.6																		4
ISK5_HUMAN	Serine protease inhibitor Kazal-type 5 precursor	CM / IMAC	124523	8.5	25	29	5	5	4.5	7	0.03	9	2	2	9.6	0.52																				7
ISOC1_HUMAN	Isochorismatase domain-containing protein 1	CM	32237		19	19			2	2		2	1	1	9.3
ITA7_HUMAN	Integrin alpha-7 precursor [Contains: Integrin alpha-7 heavy chain; Integrin alpha-7 light chain]	CM	130182		16	16			6	6	0.03	6	1	1	2.3			6
ITIH2_HUMAN	Inter-alpha-trypsin inhibitor heavy chain H2 precursor	IMAC	106892		20	20			4	4	0.03	4	1	1	3.7
ITIH4_HUMAN	Inter-alpha-trypsin inhibitor heavy chain H4 precursor	CM / IMAC	103552	6.51	42	101	8.03793	14.5	9.5	19	0.11	142	42	30	11.6	1.25			14				4	17				3	8	14	3	6	16			7	10							7	5	9	12	8
ITPR2_HUMAN	Inositol 1,4,5-trisphosphate receptor type 2	CM	311269		16	16			5	5	0.01	5	1	1	1																																		5
ITSN2_HUMAN	Intersectin-2	CM	194412	8.32	19	23	4.75	5.1	6.5	7	0.02	13	2	2	4.3	1.19
IYD1_HUMAN	Iodotyrosine dehalogenase 1 precursor	CM / IMAC	33530	7.16	25	27	5.7	5.9	5.7	11	0.11	17	4	4	24.8	0.24					4							4								11
JAD1A_HUMAN	Histone demethylase JARID1A	CM	198781		18	18			15	15	0.02	15	1	1	6									15
JAD1C_HUMAN	Histone demethylase JARID1C	CM	178400	5.44	18	18	3	3	5	5	0.02	5	1	1	3.9	0.77
JAD1D_HUMAN	Histone demethylase JARID1D	CM	176867	5.59	18	18	1.4	1.4	2	2		2	1	1	4	0.35
JAG2_HUMAN	Protein jagged-2 precursor	CM	140782	5.53	22	22	2.6	2.6	3	3	0.03	3	1	1	7.1	0.37
JHD3B_HUMAN	JmjC domain-containing histone demethylation protein 3B	CM	123778		19	19			2	2	0.03	2	1	1	2.4																																		2
K0401_HUMAN	Uncharacterized protein KIAA0401	IMAC	103696	8.83	18	18	2.2	2.2	2	2	0.04	2	1	1	8.7	0.25
K0406_HUMAN	Uncharacterized protein KIAA0406	CM / IMAC	123551		21	23			7.5	9	0.03	15	2	2	3.2																			9
K0467_HUMAN	Uncharacterized protein KIAA0467	IMAC	281193	5.69	22	25	1.6	2.4	3	4	0.01	6	2	2	5	0.48
K1033_HUMAN	Uncharacterized protein KIAA1033	CM	137443		20	20			3	3	0.03	3	1	1	2.2
K1210_HUMAN	Uncharacterized protein KIAA1210	CM	120496	7.88	22	22	2.7	2.7	4	4	0.03	4	1	1	8.3	0.33
K1310_HUMAN	Uncharacterized protein KIAA1310	CM	96618	9.46	25	25	1.3	1.3	2	2	0.04	2	1	1	10.4	0.13
K1328_HUMAN	Uncharacterized protein KIAA1328	IMAC	66228		15	15			1	1	0.06	1	1	1	6
K1542_HUMAN	RING and PHD-finger domain-containing protein KIAA1542	CM	180320	9.15	14	14	4.1	4.1	5	5	0.02	5	1	1	3.1	1.32
K1614_HUMAN	Uncharacterized protein KIAA1614	CM	127671	9.05	21	21	3	3	6	6	0.03	6	1	1	6.5	0.46																																6
K1666_HUMAN	Uncharacterized protein KIAA1666	CM	172179	6.11	26	26	0.8	0.8	1	1	0.02	1	1	1	3.8	0.21																														1
K1C10_HUMAN	Keratin, type I cytoskeletal 10	CM / IMAC	59738	5.13	104	1054	19.2016	45.4	25.8	101	0.77	876	99	59	25.1	1.81	28	94	7	4	17	6	14	8	13	5	5	71	9	6	32	11	101	27	14	24	19	17	101	4	8	8	11	24	19		19	17	6
K1C12_HUMAN	Keratin, type I cytoskeletal 12	CM / IMAC	53625	4.7	41	133	8.42727	15	11.5	26	0.14	127	16	13	26.1	0.57		19		3			7					22					26	8					25								4
K1C13_HUMAN	Keratin, type I cytoskeletal 13	CM / IMAC	49928	4.91	38	110	9.31429	12.9	6.9	12	0.12	48	11	9	30	0.43		9										11			5		12	6		2			9								6
K1C14_HUMAN	Keratin, type I cytoskeletal 14	CM / IMAC	51906	5.09	58	250	16.82	41.9	16.8	53	0.44	285	28	25	19.3	2.17		51			5		7		6			25			23		53	17		11		8	25				9	13	7		8	8
K1C15_HUMAN	Keratin, type I cytoskeletal 15	CM / IMAC	49395	4.71	47	158	12.1615	23.7	11.9	27	0.16	119	15	15	20.2	1.17							6		6			14			15		27			3			20					11	7		6
K1C16_HUMAN	Keratin, type I cytoskeletal 16	CM / IMAC	51610	4.99	53	201	16.59	38.9	16.4	47	0.43	262	28	23	23.3	1.67	14	47					6		6			23			22		43	18		18			22				11		10			8
K1C17_HUMAN	Keratin, type I cytoskeletal 17	CM / IMAC	48390	4.97	43	96	12.55	26.6	15	37	0.24	165	19	17	20.7	1.29		37										15			14		33	9		3			17					9			6	6
K1C18_HUMAN	Keratin, type I cytoskeletal 18	CM / IMAC	48057	5.34	40	54	6.83333	11.4	7.3	10	0.12	22	4	4	20.8	0.55		10										8					8			4
K1C19_HUMAN	Keratin, type I cytoskeletal 19	CM / IMAC	44091	5.04	40	83	11.2273	19.5	10.8	32	0.13	119	14	13	22.7	0.86							6					10			11		32	9					18						7		9	6
K1C24_HUMAN	Keratin, type I cytoskeletal 24	CM / IMAC	55600	4.89	36	55	6.82	11.4	7.7	14	0.11	69	9	9	27	0.42		14										10					9	4		5			11								6
K1C25_HUMAN	Keratin, type I cytoskeletal 25	CM / IMAC	49888	5	51	182	7.45714	13.1	7.6	18	0.16	53	10	9	20	0.66		15										18	2							4
K1C26_HUMAN	Keratin, type I cytoskeletal 26	CM / IMAC	52652	4.86	46	80	4.65	6	4.7	7	0.07	14	4	4	15.8	0.38												7								3			7
K1C27_HUMAN	Keratin, type I cytoskeletal 27	CM / IMAC	50450	5.06	42	206	7.85455	15.5	9.6	28	0.25	115	24	19	29.7	0.52	9	13					5					20	2		7			7		5	3	3	28				2		9
K1C28_HUMAN	Keratin, type I cytoskeletal 28	CM / IMAC	51222	5.33	30	54	7.15	9.1	10.9	29	0.15	87	9	8	19.5	0.47		19											3				29			4		5
K1C9_HUMAN	Keratin, type I cytoskeletal 9	CM / IMAC	62357	5.19	119	900	28.9903	63.9	33.2	161	1.02	1128	83	48	24.1	2.65	16	85	16	21	16	10	16	12	31		14	41			28		161	47		37	34	32	14	10	16	14	28	22	30		31	28
K1H1_HUMAN	Keratin, type I cuticular Ha1	CM / IMAC	48658	4.87	39	45	9.1	10.3	7	8	0.12	14	3	3	20.6	0.5		8										6
K1H2_HUMAN	Keratin, type I cuticular Ha2	CM / IMAC	51802	4.81	40	54	6.33333	7.8	6.3	8	0.11	19	4	4	19.3	0.4		8										7					8
K22E_HUMAN	Keratin, type II cytoskeletal 2 epidermal	CM / IMAC	66150	8.07	97	1041	21.3482	58.3	25.4	98	0.9	813	90	54	22.7	2.57	25	61	6	7	15	8	14	6	21		7	77	6	5	25	10	98	27	14	31	19	13	70	8	6		20	18	19	9	18	11
K22O_HUMAN	Keratin, type II cytoskeletal 2 oral	CM / IMAC	66441	8.38	43	77	7.6625	11.1	9	29	0.09	63	11	11	13.5	0.82						5			6								29	6				7							7
K2C1_HUMAN	Keratin, type II cytoskeletal 1	CM / IMAC	66188	8.16	140	1171	30.8958	56.4	38.2	178	1.3	1720	105	62	22.7	2.48	30	100	22	20	28	16	25	14	26	10	12	79	16	19	38	23	178	71	19	41	35	38	88	23	19	17	33	34	49	16	47	35	23
K2C1B_HUMAN	Keratin, type II cytoskeletal 1b	CM / IMAC	61973	5.63	49	110	10.4769	24.3	9.6	20	0.15	106	18	15	16.1	1.51		16							3			18					16	12		8			20
K2C3_HUMAN	Keratin, type II cytoskeletal 3	CM / IMAC	64674	6.12	41	89	8.69286	12.7	12	34	0.15	132	19	18	23.2	0.55		17				6	5		5			15					34	9		7		7	16						8
K2C4_HUMAN	Keratin, type II cytoskeletal 4	CM / IMAC	57684	6.25	29	59	7.91111	18.2	7.9	17	0.1	55	12	11	17.3	1.05									10			5					17	5		3	5	5	14						4
K2C5_HUMAN	Keratin, type II cytoskeletal 5	CM / IMAC	62606	7.59	53	326	13.285	35.6	14.2	50	0.37	270	61	43	24	1.48	5	34	4		11	5			9			31	4		9	3	50	10		10	8	6	23			3	12	12	9		11
K2C6A_HUMAN	Keratin, type II cytoskeletal 6A	CM / IMAC	60329	8.09	58	219	14.68	33.3	14.5	55	0.28	275	62	39	24.9	1.34	16	34	4	5	7	6		4	8			20		5	16	6	55	10		15	8		20				19	11	10		3
K2C6B_HUMAN	Keratin, type II cytoskeletal 6B	CM / IMAC	60283	8.09	47	140	11.5429	20.6	10.2	30	0.24	122	26	23	24.9	0.83		30		2				4				7			14		8	7			6				3		18				7
K2C6C_HUMAN	Keratin, type II cytoskeletal 6C	CM / IMAC	60310	8.09	59	165	14.5364	36	13.7	50	0.28	247	50	36	24.9	1.45	16	30	2	2		6		4	8			19		6	15	4	50	8		15	7				3		19	12	10		7
K2C7_HUMAN	Keratin, type II cytoskeletal 7	CM / IMAC	51474	5.5	30	61	8.37273	15.1	5.9	12	0.11	47	14	11	19.4	0.78					5				6			8					12	3		4	3		5
K2C71_HUMAN	Keratin, type II cytoskeletal 71	CM / IMAC	57762	6.28	40	69	9.175	18.7	9.8	16	0.1	78	10	9	26	0.72							8		14			14					16	6		6									7
K2C72_HUMAN	Keratin, type II cytoskeletal 72	CM / IMAC	56504	6.54	42	73	8.7875	20.7	8.5	17	0.14	51	11	10	26.5	0.78									2			15					17	6											4
K2C73_HUMAN	Keratin, type II cytoskeletal 73	CM / IMAC	59493	6.93	38	69	10.7111	19.1	10	27	0.1	90	11	10	25.2	0.76							5		11			17					27	10		4									6
K2C74_HUMAN	Keratin, type II cytoskeletal 74	CM / IMAC	58264	7.59	40	69	9.2625	18	8.6	18	0.1	69	10	9	25.7	0.7							10		5			17					18	7											5
K2C75_HUMAN	Keratin, type II cytoskeletal 75	CM / IMAC	59789	7.6	47	214	11.1462	21.8	10.7	28	0.18	150	47	35	25.1	0.87	9	16	6	4	6			6	5			18		5	11	4	28	12		7	8	8						7	6		3
K2C78_HUMAN	Keratin, type II cytoskeletal 78	CM / IMAC	57664	5.79	41	68	14.35	31.2	10.3	30	0.14	103	14	12	26	1.2							4		4			15					30	9					14						7
K2C79_HUMAN	Keratin, type II cytoskeletal 79	CM / IMAC	58094	6.75	48	183	10.8933	24.9	10.8	30	0.19	141	45	34	25.8	0.97	4	18	3		6			5	5			23		6			30	9		6	6	5	16					6	5		3
K2C8_HUMAN	Keratin, type II cytoskeletal 8	CM / IMAC	53704	5.52	31	61	7.41538	18.8	8.2	17	0.11	74	20	15	18.6	1.01					8				6			13					17	3		4	5	3	7						5			4
K2C80_HUMAN	Keratin, type II cytoskeletal 80	CM / IMAC	51038	5.58	29	61	7.9875	13.5	4	6	0.11	20	12	11	19.6	0.69					3				3								4	4		2	2		6						5
K6PF_HUMAN	6-phosphofructokinase, muscle type	CM	86037	8.23	17	17	1.4	1.4	1	1	0.04	1	1	1	9.6	0.15												1
KAC_HUMAN	Ig kappa chain C region	CM / IMAC	11780	5.58	59	332	45.6929	68.9	10.2	29	2.12	153	64	40	127.3	0.54	4		10		1			10				6	10	9	2	3	29	25		9	10		1					11	10	9	15	11	4
KAIN_HUMAN	Kallistatin precursor	CM	48713	7.33	40	40	8.9	8.9	4	4	0.08	4	1	1	20.5	0.43
KCC1A_HUMAN	Calcium/calmodulin-dependent protein kinase type 1	CM	41907	5.12	23	23	2.2	2.2	1	1	0.09	1	1	1	23.9	0.09												1
KCC1B_HUMAN	Calcium/calmodulin-dependent protein kinase type 1B	IMAC	38728	6.28	15	15	2.6	2.6	1	1	0.1	1	1	1	6.5	0.4																							1
KCC2A_HUMAN	Calcium/calmodulin-dependent protein kinase type II alpha chain	IMAC	54600	6.73	17	17	2.7	2.7	4	4	0.07	4	1	1	16.5	0.16																				4
KCC2B_HUMAN	Calcium/calmodulin-dependent protein kinase type II beta chain	IMAC	72678	8.06	17	17	2.6	2.6	3	3		3	1	1	12.4	0.21																				3
KCNH6_HUMAN	Potassium voltage-gated channel subfamily H member 6	IMAC	111236	6.55	16	16	2.1	2.1	3	3	0.03	3	1	1	13.5	0.16																		3
KCNQ2_HUMAN	Potassium voltage-gated channel subfamily KQT member 2	CM	96987	9.35	28	28	5.3	5.3	3	3	0.04	3	1	1	8.6	0.62												3
KCRM_HUMAN	Creatine kinase M-type	CM	43329		89	89			7	7	0.28	7	1	1	6.9
KI21A_HUMAN	Kinesin-like protein KIF21A	CM	188489	6.05	24	24	2.7	2.7	4	4	0.02	4	1	1	5.3	0.51
KI21B_HUMAN	Kinesin-like protein KIF21B	CM	184428	6.7	24	24	2.4	2.4	6	6	0.02	6	1	1	5.4	0.44
KIF14_HUMAN	Kinesin-like protein KIF14	IMAC	187859	8.06	24	24	9.5	9.5	21	21	0.02	21	1	1	1.6	5.94												21
KIN_HUMAN	KIN, antigenic determinant of recA protein homolog	CM	45773	9.07	16	16	14	14	5	5	0.08	5	1	1	21.8	0.64
KLK1_HUMAN	Kallikrein-1 precursor	CM	29517	4.62	25	30	8.8	8.8	2.5	3	0.13	5	2	1	33.9	0.26			3
KLK3_HUMAN	Prostate-specific antigen precursor	CM / IMAC	29311	7.62	30	38	10.8	16.9	3.8	6	0.28	19	9	7	40.9	0.41			5					6						4																		3
KLK8_HUMAN	Kallikrein-8 precursor	IMAC	28789	7.52	31	31	2.3	2.3	1	1	0.13	1	1	1	31.3	0.07																		1
KLKB1_HUMAN	Plasma kallikrein precursor	IMAC	73480	8.6	26	26	6.9	6.9	8	8	0.05	8	1	1	4.1	1.68
KNG1_HUMAN	Kininogen-1 precursor	CM / IMAC	73041	6.34	57	154	7.04118	12.9	7.8	16	0.22	101	30	23	19.2	0.67			15	3				8					4	5			16			4										3	7	8
KPBB_HUMAN	Phosphorylase b kinase regulatory subunit beta	CM	126024	6.5	17	17	0.9	0.9	1	1	0.03	1	1	1	3.6	0.25																				1
KPYM_HUMAN	Pyruvate kinase isozymes M1/M2	CM / IMAC	58507	7.96	39	78	7.03333	9	4.8	7	0.1	19	7	6	20.5	0.44								4						2														2			7
KRT35_HUMAN	Keratin, type I cuticular Ha5	CM / IMAC	48841	4.75	47	54	7.5	9.4	8	8	0.12	8	3	3	8.2	1.15		8										8					8
KRT36_HUMAN	Keratin, type I cuticular Ha6	CM / IMAC	53388	4.9	29	42	6.86667	9	5.3	7	0.07	16	4	4	18.7	0.48												7								4
KRT37_HUMAN	Keratin, type I cuticular Ha7	CM	51116	4.9	19	20	4.2	5.3	4	5	0.07	8	2	2	19.6	0.27																				3
KRT38_HUMAN	Keratin, type I cuticular Ha8	CM / IMAC	52087	4.79	34	54	4.26667	5.5	5.8	8	0.11	23	4	4	19.2	0.29		8															7			3
KRT81_HUMAN	Keratin type II cuticular Hb1	IMAC	54928		27	27			2	2		2	1	1	7.3
KRT82_HUMAN	Keratin type II cuticular Hb2	IMAC	56653	6.4	37	46	1.8	1.8	2.5	3		5	2	2	7.1	0.25												3
KRT83_HUMAN	Keratin, type II cuticular Hb3	IMAC	54195		27	27			2	2		2	1	1	7.4
KRT84_HUMAN	Keratin type II cuticular Hb4	IMAC	65979	8	25	28	8.8	8.8	8.3	15	0.06	25	3	3	13.6	0.65																	15			6
KRT85_HUMAN	Keratin, type II cuticular Hb5	IMAC	55802		27	27			2	2		2	1	1	7.2
KRT86_HUMAN	Keratin, type II cuticular Hb6	IMAC	53501		27	27			2	2		2	1	1	7.5
KT33A_HUMAN	Keratin, type I cuticular Ha3-I	CM	47190	4.82	30	30	7.7	7.7	3	3	0.08	3	1	1	21.2	0.36
KT33B_HUMAN	Keratin, type I cuticular Ha3-II	CM / IMAC	47354	4.81	34	45	7.7	7.7	5.7	8	0.08	17	3	3	21.1	0.36		8
KTN1_HUMAN	Kinectin	CM	156559	5.52	23	23	2	2	5	5	0.02	5	1	1	3.5	0.57
KV101_HUMAN	Ig kappa chain V-I region AG	CM / IMAC	12106	5.67	31	39	34.75	38	2.5	3	0.33	5	7	7	123.9	0.31												2						3											3		3
KV104_HUMAN	Ig kappa chain V-I region CAR	CM / IMAC	11818	9.47	35	44	20.55	24.3	3	5	0.34	15	10	10	126.9	0.19				1										3				2											3		4
KV105_HUMAN	Ig kappa chain V-I region DEE	CM / IMAC	11775	9.43	38	52	16.7	16.7	2.3	4	0.34	7	11	10	118.9	0.14														2			4				1					2	1				2
KV106_HUMAN	Ig kappa chain V-I region EU	CM / IMAC	11902	8.62	35	48	21.85	26.9	4.3	9	0.33	30	12	12	126	0.21				1				5						3			9	2											3		4
KV107_HUMAN	Ig kappa chain V-I region Gal	CM	11814	9.04	37	37	27.8	27.8	3	3		3	1	1	84.6	0.33																															3
KV110_HUMAN	Ig kappa chain V-I region HK102 precursor	CM / IMAC	12939	6.07	32	37	13.7	13.7	1.5	2	0.3	3	2	2	92.7	0.15																												1
KV112_HUMAN	Ig kappa chain V-I region Kue	IMAC	12241	8.96	34	34	24.1	24.1	2	2	0.32	2	1	1	73.5	0.33																					2
KV113_HUMAN	Ig kappa chain V-I region Lay	CM / IMAC	11948	7.96	34	46	17.6	31.5	2.8	5	0.33	11	9	7	117.2	0.27																				2								3		1	2
KV114_HUMAN	Ig kappa chain V-I region OU	CM	11891	9.94	33	38	16.7	16.7	2.3	4	0.33	7	5	4	100.9	0.17												2					4									2					2
KV120_HUMAN	Ig kappa chain V-I region Mev	CM	11984		28	28			3	3	0.33	3	1	1	100.1																		3
KV121_HUMAN	Ig kappa chain V-I region Ni	CM / IMAC	12246	5.25	37	39	30.4	30.4	2.5	3		5	4	4	122.5	0.25																		2											3
KV122_HUMAN	Ig kappa chain V-I region BAN	IMAC	11954	8.6	18	18	16.7	16.7	1	1	0.33	1	1	1	75.3	0.22																													1
KV201_HUMAN	Ig kappa chain V-II region Cum	CM / IMAC	12790	5.28	32	77	22.8429	33.9	2.5	4	0.31	10	20	16	93.8	0.36												2								2						4		3	2	3	4
KV203_HUMAN	Ig kappa chain V-II region MIL	CM / IMAC	12170	9.39	34	56	15.12	20.5	3.8	8	0.54	23	37	28	123.3	0.17								4				2	4	3			8	3		2	2					2		3	2	3	5	1	2
KV204_HUMAN	Ig kappa chain V-II region TEW	CM / IMAC	12430		29	44	15.65	20	3	5	0.32	15	17	14	96.5	0.21												2								2								3	2	3	4
KV205_HUMAN	Ig kappa chain V-II region GM607 precursor	CM / IMAC	12778	6.75	34	77	19.88	36.8	3.8	9	0.51	19	18	14	93.9	0.39												2					9			2								3	2	3	4
KV206_HUMAN	Ig kappa chain V-II region RPMI 6410 precursor	CM / IMAC	14821	9.34	31	77	16.7	23.3	4.1	8	0.43	29	18	14	81	0.29			4									2					8			2						2		2	2		4
KV301_HUMAN	Ig kappa chain V-III region B6	CM / IMAC	11749	9.34	52	95	30.81	58.3	4.8	10	0.84	38	52	34	127.7	0.46			6	2				4				4	5		4		7	5	1	3	3			3			2		2	2	7	3	2
KV302_HUMAN	Ig kappa chain V-III region SIE	CM / IMAC	11889	8.7	57	120	43.6875	70.6	5.6	11	1.58	56	57	39	126.2	0.56	3		11	2			3	6				3	6	6				7	3	4	5			5		3	5	4	6	3	11	7	5
KV303_HUMAN	Ig kappa chain V-III region NG9 precursor	CM / IMAC	10843	6.29	42	80	33.2	54	4	7	0.62	28	24	20	138.3	0.39			3									3	3				5	2			2									1	5	6
KV304_HUMAN	Ig kappa chain V-III region Ti	CM / IMAC	11902	8.72	54	117	38.875	59.6	5.7	11	0.83	57	38	28	126	0.47			10					3				3	5	7			11	7		4	4						3	5	5	3	6	3
KV305_HUMAN	Ig kappa chain V-III region WOL	CM / IMAC	11860	9.07	58	117	40.37	56.9	6.8	14	1.58	82	58	40	126.5	0.45	3		11	2			3	6				5	6	6		3	14	8	3	4	5					3		4	4	3	5		5
KV306_HUMAN	Ig kappa chain V-III region POM	CM / IMAC	12036	9.11	35	46	15.9333	24.8	2.5	4	0.55	10	11	8	116.3	0.21																	4			2								3		1	2
KV307_HUMAN	Ig kappa chain V-III region GOL	CM / IMAC	11944	9.34	50	87	43.1143	62.4	5.2	10	0.82	47	15	14	117.2	0.53		3												5	4		9	6									3	2
KV308_HUMAN	Ig kappa chain V-III region CLL precursor	CM / IMAC	14389	8.71	33	46	16.8	24.8	3.2	6	0.27	16	12	10	104.2	0.24													3				6	4		2								3		1	2
KV309_HUMAN	Ig kappa chain V-III region VG precursor	CM / IMAC	12689	4.85	33	68	19.125	26.1	2.5	4	0.52	10	17	14	94.6	0.28								1				1					3	2			2										2	2
KV310_HUMAN	Ig kappa chain V-III region VH precursor	CM / IMAC	12871	5.63	30	47	18.8667	25	3.2	6	0.51	16	17	12	116.5	0.21			2														3	3		2									4	1	3
KV312_HUMAN	Ig kappa chain V-III region HAH precursor	CM / IMAC	14187	7.74	55	113	34.7	51.2	5.3	10	1.2	37	22	17	84.6	0.61			3									3			2		10	6			4								5		7	5
KV313_HUMAN	Ig kappa chain V-III region HIC precursor	CM / IMAC	14185	7.74	51	99	31.9	42.6	4.2	7	0.46	21	18	13	84.6	0.5			3									3			2				3		3								5		7	5
KV401_HUMAN	Ig kappa chain V-IV region precursor	CM	13494	5.09	21	21	7.4	7.4	1	1	0.29	1	1	1	33.3	0.22												1
KV402_HUMAN	Ig kappa chain V-IV region Len	CM / IMAC	12754	7.92	35	60	26.6667	47.4	3.8	7	0.75	23	23	19	117.6	0.4			1									1					7	6		2	4								3
KV403_HUMAN	Ig kappa chain V-IV region JI precursor	CM	14746		22	23	7.4	7.4	3	5	0.6	6	2	2	81.4	0.09												1					5
KV404_HUMAN	Ig kappa chain V-IV region B17 precursor	CM	15080		22	23	7.4	7.4	3	5		6	2	2	79.6	0.09												1					5
KV405_HUMAN	Ig kappa chain V-IV region STH	IMAC	12174	7.94	21	21	16.5	16.5	2	2	0.32	2	1	1	73.9	0.22																													2
LAC_HUMAN	Ig lambda chain C regions	CM / IMAC	11408	6.92	37	99	38.8833	56.2	8.3	18	1.23	100	53	32	131.5	0.43			10		3			13				3	4	7		2	18	9			8					2		6	6		10	7	5
LAIR1_HUMAN	Leukocyte-associated immunoglobulin-like receptor 1 precursor	CM	31697	5.4	31	31	8.4	8.4	3	3	0.12	3	1	1	31.5	0.27
LAMA2_HUMAN	Laminin subunit alpha-2 precursor	IMAC	352010	6	20	20	5.1	5.1	17	17	0.01	17	1	1	4.3	1.19																		17
LAP2B_HUMAN	Lamina-associated polypeptide 2, isoforms beta/gamma	IMAC	50727	9.39	26	26	6.2	6.2	4	4	0.07	4	1	1	4.9	1.27																							4
LCORL_HUMAN	Ligand-dependent nuclear receptor corepressor-like protein	CM	67819	8.2	32	32	4.7	4.7	2	2	0.05	2	1	1	10.3	0.46
LCTL_HUMAN	Lactase-like protein precursor	CM	65601	8.17	20	20	3.5	3.5	2	2	0.06	2	1	1	15.2	0.23			2
LDHA_HUMAN	L-lactate dehydrogenase A chain	CM	36974	8.44	25	25	9	9	3	3	0.1	3	1	1	27	0.33																															3
LDHB_HUMAN	L-lactate dehydrogenase B chain	CM	36923		20	20			3	3	0.1	3	1	1	22.5																																3
LEG3_HUMAN	Galectin-3	CM	26245		20	20			5	5	0.15	5	1	1	45.7									5
LEG7_HUMAN	Galectin-7	CM / IMAC	15132	7.03	49	85	21.3333	35.3	2.7	5	0.42	8	4	3	66.1	0.53												2								5
LENEP_HUMAN	Lens epithelial cell protein LEP503	CM	7079	8.61	21	21	8.2	8.2	1	1		1	1	1	141.3	0.06
LG3BP_HUMAN	Galectin-3-binding protein precursor	CM	66243	5.13	22	24	8.1	13.8	4.5	8	0.06	9	2	2	15.1	0.91																											1
LIN9_HUMAN	Lin-9 homolog	CM	62458	9.17	14	14	2.2	2.2	1	1	0.06	1	1	1	7.2	0.31
LKAP_HUMAN	Limkain-b1	CM	195777	8.13	16	16	3.2	3.2	8	8		8	1	1	2.8	1.14
LKHA4_HUMAN	Leukotriene A-4 hydrolase	CM	69912	5.8	41	41	5.9	5.9	3	3	0.05	3	1	1	11.9	0.5																															3
LMAN2_HUMAN	Vesicular integral-membrane protein VIP36 precursor	CM / IMAC	40570	6.46	29	45	11.3385	20.5	7.2	23	0.29	79	22	16	29.6	0.69			7					3						3			7									2		5	5	2	9	2
LMNA_HUMAN	Lamin-A/C	CM	74424	6.57	19	19	6.2	6.2	3	3	0.05	3	1	1	8.7	0.71													3
LRC4B_HUMAN	Leucine-rich repeat-containing protein 4B precursor	CM	77346	6.8	15	15	1.4	1.4	1	1		1	1	1	12.9	0.11
LRP2_HUMAN	Low-density lipoprotein receptor-related protein 2 precursor	CM / IMAC	540723	4.89	23	28	1.8	2	9.7	13	0.01	29	3	3	2.8	0.71																		9													13
LRRC4_HUMAN	Leucine-rich repeat-containing protein 4 precursor	CM	73572	6.58	15	15	4.9	4.9	2	2	0.05	2	1	1	13.6	0.36
LRRN3_HUMAN	Leucine-rich repeat neuronal protein 3 precursor	CM	80393		14	14			5	5	0.05	5	1	1	14.9									5
LSD1_HUMAN	Lysine-specific histone demethylase 1	CM	93415	6.11	16	16	2	2	2	2	0.04	2	1	1	10.7	0.19
LSP1_HUMAN	Lymphocyte-specific protein 1	IMAC	37419	4.69	37	37	14.2	14.2	6	6	0.21	6	1	1	24.1	0.59																		6
LUM_HUMAN	Lumican precursor	CM	38771	6.16	21	21	6.2	6.2	1	1	0.1	1	1	1	25.8	0.24
LUZP2_HUMAN	Leucine zipper protein 2 precursor	CM	39300	8.9	18	18	3.2	3.2	1	1	0.1	1	1	1	14	0.23																										1
LV301_HUMAN	Ig lambda chain V-III region SH	CM	11506		45	45			1	1	0.34	1	1	1	104.3
LV302_HUMAN	Ig lambda chain V-III region LOI	CM / IMAC	12049	4.95	33	68	22.5	37.8	3.7	7	0.81	22	16	15	124.5	0.3								3						4			7	5			2							2	4			3
LV403_HUMAN	Ig lambda chain V-IV region Hil	CM	11631		29	29			2	2	0.34	2	1	1	103.2
LYAG_HUMAN	Lysosomal alpha-glucosidase precursor	CM / IMAC	106192	5.62	31	56	5.14118	9	4.5	8	0.07	36	29	23	13.2	0.68			5					6					4	6			4				6							7	7	5	5
LYPA3_HUMAN	1-O-acylceramide synthase precursor	CM	46942	6.27	33	45	7.6	12.4	3	4	0.08	6	3	2	21.3	0.58																															4
LYSC_HUMAN	Lysozyme C precursor	CM / IMAC	16993	9.38	34	60	21.0375	30.4	7.8	30	0.53	62	27	21	88.3	0.34	2		7					3	1			4		4			4	30		3	3							3	5		4
MA2B1_HUMAN	Lysosomal alpha-mannosidase precursor	CM	114427	6.84	24	24	5.9	5.9	5	5	0.03	5	1	1	5.7	1.04
MA2B2_HUMAN	Epididymis-specific alpha-mannosidase precursor	CM	114172	6.82	19	23	3.2	4.1	3.5	5	0.03	7	2	2	8.8	0.47																															2
MAGB4_HUMAN	Melanoma-associated antigen B4	IMAC	38923	9.28	17	17	4.9	4.9	3	3		3	1	1	23.1	0.21																				3
MAGF1_HUMAN	Melanoma-associated antigen F1	IMAC	35308	9.71	16	16	4.9	4.9	5	5	0.11	5	1	1	39.7	0.12
MAGI2_HUMAN	Membrane-associated guanylate kinase, WW and PDZ domain-containing protein 2	CM	159551	5.95	31	31	1.6	1.6	9	9		9	1	1	4.4	0.36
MASP2_HUMAN	Mannan-binding lectin serine protease 2 precursor	CM / IMAC	77273	5.47	38	65	6.31071	12.8	9.3	18	0.13	149	57	38	18.1	0.71			17	3			4				3	4	5	11	11		12			5	9	3		3	4	8		9	3	2	13	17	2
MBL2_HUMAN	Mannose-binding protein C precursor	CM	26543	5.39	16	16	4.8	4.8	5	5		5	1	1	20.7	0.23
MCF2_HUMAN	Proto-oncogene DBL	CM	108642	5.72	18	18	1.2	1.2	1	1	0.03	1	1	1	9.2	0.13
MCM4_HUMAN	DNA replication licensing factor MCM4	CM	96558	6.28	27	27	2.5	2.5	5	5		5	1	1	4.7	0.53
MDHM_HUMAN	Malate dehydrogenase, mitochondrial precursor	CM	35987	8.92	33	47	3.6	3.6	3	4	0.22	6	2	2	33.3	0.11
MDN1_HUMAN	Midasin	CM	638404	5.46	15	16	2	2	10	11	0.01	20	2	2	1	2													11												9
MED27_HUMAN	Mediator of RNA polymerase II transcription subunit 27	CM	35660		15	15			2	2	0.11	2	1	1	33.7
MED8_HUMAN	Mediator of RNA polymerase II transcription subunit 8	CM / IMAC	29194		18	19			2	2	0.13	2	2	2	41.1						2
MEIS1_HUMAN	Homeobox protein Meis1	CM	43016	5.86	16	16	1.3	1.3	1	1		1	1	1	19.3	0.07																																1
METH_HUMAN	Methionine synthase	IMAC	141838		15	15			3	3	0.03	3	1	1	2.8							3
MFRN1_HUMAN	Mitoferrin-1	CM	37323	9.53	22	22	1.4	1.4	1	1		1	1	1	18.8	0.07
MFSD4_HUMAN	Major facilitator superfamily domain-containing protein 4	IMAC	57120	8.67	20	20	1.2	1.2	1	1	0.07	1	1	1	4.4	0.27										1
MGA_HUMAN	Maltase-glucoamylase, intestinal [Includes: Maltase	CM	211163	5.26	19	19	0.7	0.7	2	2	0.02	2	1	1	2.6	0.27																								2
MIA3_HUMAN	Melanoma inhibitory activity protein 3 precursor	CM / IMAC	214384	4.76	26	29	2.6	2.6	7	9	0.02	14	2	2	5.6	0.46																													5
MIF_HUMAN	Macrophage migration inhibitory factor	IMAC	12647	7.74	30	34	9.6	9.6	1	1	0.31	1	3	3	110.7	0.09																				1									1
MILK2_HUMAN	MICAL-like protein 2	CM	98300	9.63	19	19	6.3	6.3	6	6	0.04	6	1	1	6.6	0.95
MKX_HUMAN	Homeobox protein Mohawk	CM	39475	9.66	17	19	3.1	3.1	2.5	3	0.09	5	2	2	30.4	0.1								3
MLL2_HUMAN	Myeloid/lymphoid or mixed-lineage leukemia protein 2	CM / IMAC	570397	5.65	20	26	2.5	2.6	12.7	17	0.01	38	3	3	1.8	1.44																				11
MLL3_HUMAN	Myeloid/lymphoid or mixed-lineage leukemia protein 3 homolog	CM / IMAC	548546	6.06	17	18	1.4	1.9	8.3	12	0.01	25	3	3	1.3	1.46																9
MLXIP_HUMAN	MLX-interacting protein	CM	101926	8.61	17	17	3.8	3.8	6	6	0.04	6	1	1	6.4	0.59							6
MMEL1_HUMAN	Membrane metallo-endopeptidase-like 1	CM	90050		22	22			1	1	0.04	1	1	1	3.3
MMP16_HUMAN	Matrix metalloproteinase-16 precursor	IMAC	69521	8.72	27	27	2	2	2	2		2	1	1	4.3	0.47
MMP8_HUMAN	Neutrophil collagenase precursor	IMAC	53583	6.38	27	27	14.8	14.8	7	7	0.14	7	1	1	16.8	0.88																		7
MMP9_HUMAN	Matrix metalloproteinase-9 precursor	CM / IMAC	79510	5.69	46	57	8.675	15.6	7	10	0.1	28	5	3	18.9	0.83	8																	10													6
MMRN2_HUMAN	Multimerin-2 precursor	CM / IMAC	105100	5.5	25	32	4.16667	5.8	3.7	7	0.04	11	5	5	11.4	0.51														1			7											3	3
MNDA_HUMAN	Myeloid cell nuclear differentiation antigen	CM	46121	9.77	28	32	14.1	17.2	4.3	6	0.08	13	4	2	26	0.66								3																							6
MOES_HUMAN	Moesin	CM / IMAC	67933	6.08	27	28	8	11.3	7.3	9	0.05	22	3	2	22.1	0.51																		9													8
MOT6_HUMAN	Monocarboxylate transporter 6	CM / IMAC	54994		16	16	0.6	0.6	4	4		4	2	2	25.5	0.02
MRCKG_HUMAN	Serine/threonine-protein kinase MRCK gamma	CM	173943	5.94	15	15	2.4	2.4	2	2	0.02	2	1	1	4	0.6
MSLN_HUMAN	Mesothelin precursor	CM	69669		22	22			3	3	0.05	3	1	1	17.2																		3
MSMB_HUMAN	Beta-microseminoprotein precursor	CM	13492	5.36	21	21	8.8	8.8	1	1	0.29	1	1	1	61.5	0.14
MTP_HUMAN	Microsomal triglyceride transfer protein large subunit precursor	CM	99978	8.61	19	19	6.4	7.2	5.5	6	0.04	11	2	2	8.3	0.87																				5												6
MTPN_HUMAN	Myotrophin	IMAC	13066	5.27	45	64	26.8333	28	5.5	9	0.5	11	5	3	107.1	0.26																				2									9
MUC_HUMAN	Ig mu chain C region	CM	50241	6.35	31	31	9.7	9.7	6	6	0.07	6	1	1	19.9	0.49
MUC16_HUMAN	Mucin-16	CM	2361069	5.65	21	21	0.9	0.9	20	20	0	20	1	1	0.4	2.25
MXRA5_HUMAN	Matrix-remodeling-associated protein 5 precursor	CM	314388	8.57	19	19	1.4	1.4	4	4	0.01	4	1	1	1.4	1																				4
MXRA8_HUMAN	Matrix-remodeling-associated protein 8 precursor	IMAC	49530	6.75	31	41	3.75	5	2	3	0.08	4	3	2	28.3	0.18																				3
MYH11_HUMAN	Myosin-11	CM	228192	5.42	29	31	4.73333	7.2	11	13	0.02	33	3	2	4.4	1.64																															13
MYH14_HUMAN	Myosin-14	CM	229026	5.76	27	28	5.8	5.8	12	13	0.03	24	2	1	4.4	1.32																															13
MYH15_HUMAN	Myosin-15	CM	226035	5.66	26	26	3.7	3.7	6	6	0.02	6	1	1	3.7	1																																6
MYH2_HUMAN	Myosin-2	CM	224069	5.64	19	19	6.2	6.2	10	10	0.02	10	1	1	2.9	2.14															10
MYH9_HUMAN	Myosin-9	CM	227785	5.5	28	29	5.45	7.3	9.5	11	0.02	19	2	1	4.4	1.66																															11
MYL6_HUMAN	Myosin light polypeptide 6	CM	17101	4.56	26	30	17.85	18.5	2.5	3	0.23	5	3	1	58.5	0.32																															3
MYL6B_HUMAN	Myosin light polypeptide 6B	CM	22878	5.56	26	30	10.55	11.5	2.5	3	0.17	5	3	1	43.7	0.26																															3
MYLK_HUMAN	Myosin light chain kinase, smooth muscle	IMAC	213453	5.85	22	22	3.3	3.3	9	9	0.02	9	1	1	4.2	0.79																													9
MYO1F_HUMAN	Myosin-If	IMAC	124844	9.18	28	28	2	2	3	3		3	1	1	7.2	0.28																					3
MYO9B_HUMAN	Myosin-IXb	CM	245210	8.88	28	28	3	3	6	6	0.01	6	1	1	3.4	0.88
MYPC1_HUMAN	Myosin-binding protein C, slow-type	CM	129320		22	22			6	6	0.03	6	1	1	2.3			6
MYPT1_HUMAN	Protein phosphatase 1 regulatory subunit 12A	IMAC	115679	5.31	20	20	5	5	4	4	0.03	4	1	1	13	0.38																		4
MYSM1_HUMAN	Protein MYSM1	CM	96172	5.4	18	18	3.1	3.1	2	2	0.04	2	1	1	6.8	0.46
NADAP_HUMAN	Kanadaptin	IMAC	88814	5.11	19	19	0.6	0.6	3	3		3	1	1	4.5	0.13
NAGA_HUMAN	Putative N-acetylglucosamine-6-phosphate deacetylase	IMAC	44147	6.21	17	17	13.4	13.4	5	5	0.08	5	1	1	6.8	1.97
NALP7_HUMAN	NACHT, LRR and PYD domains-containing protein 7	CM	113974	5.87	19	19	3.3	3.3	6	6	0.03	6	1	1	5.7	0.58																														6
NAMPT_HUMAN	Nicotinamide phosphoribosyltransferase	CM	55806	6.69	15	15	3.1	3.1	1	1	0.07	1	1	1	14.9	0.21
NAP5_HUMAN	Nck-associated protein 5	IMAC	210360	8.34	23	23	7.5	7.5	11	11	0.02	11	1	1	7.1	1.06																		11
NAPSA_HUMAN	Napsin-A precursor	CM	45728	6.15	33	46	2.1	2.1	2.5	4	0.13	5	4	4	26.2	0.08								4									4														1
NAV1_HUMAN	Neuron navigator 1	IMAC	203211	8.2	28	29	2.63333	4.2	31	34	0.02	93	3	3	1.5	2.8									34
NAV2_HUMAN	Neuron navigator 2	IMAC	269442	9.13	28	29	5.06667	6.2	38.7	42	0.01	116	3	3	1.1	5.64									42
NAV3_HUMAN	Neuron navigator 3	IMAC	257098	8.92	28	29	5.3	6.1	49.7	55	0.01	149	3	3	1.2	5.08									55
NCF4_HUMAN	Neutrophil cytosol factor 4	CM	39145	6.4	13	13	7.1	7.1	2	2		2	1	1	14.1	0.5																									2
NCKX1_HUMAN	Sodium/potassium/calcium exchanger 1	CM	121772	4.9	21	21	2.8	2.8	3	3	0.03	3	1	1	8.2	0.34
NCKX5_HUMAN	Sodium/potassium/calcium exchanger 5 precursor	IMAC	55743	5.77	21	21	1.2	1.2	2	2	0.07	2	1	1	5.4	0.22												2
NCM_HUMAN	Nucampholin homolog	CM	106105		15	15			3	3	0.03	3	1	1	2.8
NCOR1_HUMAN	Nuclear receptor corepressor 1	CM / IMAC	271119	6.66	23	27	2	2.1	5	5	0.01	5	2	2	3.3	0.64																				5
NEC1_HUMAN	Neuroendocrine convertase 1 precursor	CM	84778	5.66	21	21	0.9	0.9	1	1	0.04	1	1	1	5.3	0.17																				1
NEDD8_HUMAN	NEDD8 precursor	CM	9071	7.98	26	29	35.2	42	3	4	0.77	9	4	3	110.2	0.38																															3
NEGR1_HUMAN	Neuronal growth regulator 1 precursor	CM	39403	5.84	31	31	3.7	3.7	1	1	0.1	1	1	1	25.4	0.15
NEUR1_HUMAN	Sialidase-1 precursor	CM	45980	5.58	42	42	9.6	9.6	3	3	0.08	3	1	1	21.7	0.44			3
NFM_HUMAN	Neurofilament medium polypeptide	CM	102504	4.9	15	15	8.2	8.2	7	7	0.04	7	1	1	6.8	1.21																															7
NFRKB_HUMAN	Nuclear factor related to kappa-B-binding protein	IMAC	139456		15	15			3	3	0.03	3	1	1	2.9							3
NGAL_HUMAN	Neutrophil gelatinase-associated lipocalin precursor	CM / IMAC	22759	9.02	39	68	26.4167	39.4	5.8	11	0.5	35	10	6	65.9	0.6	2							6										11		3											5
NHERF_HUMAN	Ezrin-radixin-moesin-binding phosphoprotein 50	IMAC	39153	5.55	24	28	15.2667	24.6	3.7	6	0.1	11	3	3	38.3	0.64																		6										3
NID1_HUMAN	Nidogen-1 precursor	CM / IMAC	139304	5.14	21	22	0.8	1.1	1	1	0.03	1	2	2	10	0.11
NLRC4_HUMAN	NLR family CARD domain-containing protein 4	CM	117470	6.32	16	16	2.5	2.5	4	4	0.03	4	1	1	5.5	0.45													4
NLRC5_HUMAN	Protein NLRC5	CM	204595	5.99	15	15	4.8	4.8	13	13		13	1	1	4.9	0.98
NMDZ1_HUMAN	Glutamate [NMDA] receptor subunit zeta-1 precursor	CM	106056	9.03	18	18	6.6	6.6	9	9	0.03	9	1	1	7.8	0.85																																9
NMNA3_HUMAN	Nicotinamide mononucleotide adenylyltransferase 3	CM	28492	9.28	19	19	9.1	9.1	1	1	0.13	1	1	1	24.6	0.37
NOLA1_HUMAN	H/ACA ribonucleoprotein complex subunit 1	CM	22519	10.91	16	16	10.1	10.1	22	22	0.17	22	1	1	31.1	0.32
NPNT_HUMAN	Nephronectin precursor	CM / IMAC	61907	8.74	18	19	0.9	0.9	37.5	43		75	2	2	13.4	0.07																				32
NR1H2_HUMAN	Oxysterols receptor LXR-beta	IMAC	50974		15	15			5	5		5	1	1	7.8		5
NR1H3_HUMAN	Oxysterols receptor LXR-alpha	IMAC	50396		15	15			5	5		5	1	1	7.9		5
NR6A1_HUMAN	Nuclear receptor subfamily 6 group A member 1	IMAC	55409	5.87	18	18	3.3	3.3	2	2	0.07	2	1	1	25.3	0.13				2
NRL_HUMAN	Neural retina-specific leucine zipper protein	CM / IMAC	26111	7.74	18	20	8.25	9.7	2	3	0.15	6	4	4	38.3	0.25					2							1													2
NSUN5_HUMAN	Putative methyltransferase NSUN5	CM / IMAC	47319	8.91	18	20	5.25	7.5	15	18		30	2	2	14.8	0.51
NTF2_HUMAN	Nuclear transport factor 2	CM / IMAC	14649	5.1	25	34	17.0333	23.6	2.5	4	0.44	10	9	9	95.6	0.25														1							3							2
NVL_HUMAN	Nuclear valosin-containing protein-like	CM	96077	6.11	18	18	1.6	1.6	2	2	0.04	2	1	1	10.4	0.15
OBSCN_HUMAN	Obscurin	IMAC	880170	5.68	18	20	1.45	1.6	14.5	15	0	29	2	2	1.6	1										14
ODF2L_HUMAN	Outer dense fiber protein 2-like	IMAC	74698	6.09	16	16	2.2	2.2	1	1	0.05	1	1	1	12	0.18																													1
OFUT2_HUMAN	GDP-fucose protein O-fucosyltransferase 2 precursor	CM	50260	6.15	16	16	8.4	8.4	2	2	0.07	2	1	1	16.5	0.51																																2
OGFD1_HUMAN	2-oxoglutarate and iron-dependent oxygenase domain-containing protein 1	CM	63702	5.03	20	20	1.5	1.5	1	1	0.06	1	1	1	15.7	0.1
OLIG2_HUMAN	Oligodendrocyte transcription factor 2	IMAC	32669	9.28	23	23	1.9	1.9	1	1	0.12	1	1	1	27.5	0.07
OMGP_HUMAN	Oligodendrocyte-myelin glycoprotein precursor	CM	50064	8.06	16	16	1.6	1.6	1	1		1	1	1	13	0.12													1
OPTN_HUMAN	Optineurin	CM	66321	5.12	16	16	5	5	4	4	0.06	4	1	1	12.5	0.4
OR2G3_HUMAN	Olfactory receptor 2G3	IMAC	34506	8.04	31	31	1.9	1.9	1	1		1	1	1	26.1	0.07																		1
OR2V1_HUMAN	Olfactory receptor 2V1	CM	34857	8.92	21	21	1.6	1.6	1	1		1	1	1	23.8	0.07
OR2V2_HUMAN	Olfactory receptor 2V2	CM	35339		21	21	1.6	1.6	1	1		1	1	1	23.5	0.07
OR5T3_HUMAN	Olfactory receptor 5T3	CM	36696	8.51	13	13	3.4	3.4	1	1		1	1	1	15	0.23																									1
OSBP2_HUMAN	Oxysterol-binding protein 2	CM	102235	6.1	17	17	4	4	3	3	0.04	3	1	1	9.8	0.41																															3
OSCAR_HUMAN	Osteoclast associated immunoglobulin-like receptor precursor	CM	30797	6.09	40	53	5.3	5.3	1.5	2	0.19	3	2	1	27	0.2																															2
OSTF1_HUMAN	Osteoclast-stimulating factor 1	CM	23958		28	28			1	1	0.16	1	1	1	50.1									1
OSTP_HUMAN	Osteopontin precursor	CM / IMAC	35593	4.37	50	150	19.2235	34.4	11.1	25	0.53	177	41	27	39.3	0.88			4	14			2			1		3	4			3	3	4		18	15							18	25		1
PA1B2_HUMAN	Platelet-activating factor acetylhydrolase IB subunit beta	IMAC	25740		29	29			1	1	0.15	1	1	1	15.5		1
PA21B_HUMAN	Phospholipase A2 precursor	IMAC	17158		17	17			1	1	0.23	1	1	1	23.3
PA2G6_HUMAN	85 kDa calcium-independent phospholipase A2	CM	90986		27	27			3	3	0.04	3	1	1	3.3			3
PAK2_HUMAN	Serine/threonine-protein kinase PAK 2	CM	58327		16	16			2	2	0.06	2	1	1	5.1
PANX2_HUMAN	Pannexin-2	CM	70048	9.12	16	16	1.4	1.4	1	1	0.05	1	1	1	6.4	0.22												1
PAPD5_HUMAN	PAP-associated domain-containing protein 5	IMAC	63551		26	26			4	4	0.06	4	1	1	6.3																		4
PAR6B_HUMAN	Partitioning defective 6 homolog beta	IMAC	41239	5.37	14	14	5.6	5.6	6	6		6	1	1	36.4	0.15																		6
PARC_HUMAN	p53-associated parkin-like cytoplasmic protein	IMAC	281229	5.3	16	16	2.4	2.4	9	9		9	1	1	1.1	2.18
PARK7_HUMAN	Protein DJ-1	CM	20062	6.33	33	33	4.2	4.2	1	1	0.19	1	1	1	49.8	0.08																															1
PARL_HUMAN	Presenilins-associated rhomboid-like protein, mitochondrial precursor	CM	42190		24	24			2	2		2	1	1	28.4
PCBP3_HUMAN	Poly(rC)-binding protein 3	CM	36223	8.22	24	24	3.5	3.5	1	1	0.1	1	1	1	17.9	0.2
PCD17_HUMAN	Protocadherin-17 precursor	CM / IMAC	127483	5.03	18	20	4.4	5.8	17.5	20	0.03	35	2	2	5.5	1.05
PCDH8_HUMAN	Protocadherin-8 precursor	IMAC	113873	5.35	16	16	3.8	3.8	8	8	0.03	8	1	1	2.6	1.46
PCGF6_HUMAN	Polycomb group RING finger protein 6	CM	39047		32	32			3	3		3	1	1	30.7																		3
PCIF1_HUMAN	Phosphorylated CTD-interacting factor 1	CM	81582		16	16			3	3	0.05	3	1	1	3.7
PCLO_HUMAN	Protein piccolo	CM	568647		32	32			12	12	0.01	12	1	1	2.1
PCM1_HUMAN	Pericentriolar material 1 protein	CM	230187	4.97	14	14	2.5	2.5	5	5	0.02	5	1	1	4.3	0.58
PCOC1_HUMAN	Procollagen C-endopeptidase enhancer 1 precursor	CM	48828	7.41	32	39	7.25	8.9	3.5	5	0.12	7	2	2	20.5	0.43			2
PCP_HUMAN	Lysosomal Pro-X carboxypeptidase precursor	CM	56313	6.75	22	23	2.4	2.4	1.5	2	0.07	3	2	2	11.5	0.21
PDC6I_HUMAN	Programmed cell death 6-interacting protein	IMAC	96650	6.13	28	29	5.9	7.5	31	32	0.04	62	3	3	3.1	2.42									32
PDE8B_HUMAN	High affinity cAMP-specific and IBMX-insensitive 3',5'-cyclic phosphodiesterase 8B	CM	100518		24	24			7	7	0.04	7	1	1	11.9
PDIA1_HUMAN	Protein disulfide-isomerase precursor	CM / IMAC	57515	4.76	24	28	15.6	15.6	5.5	6	0.06	11	2	2	26.1	0.6																		6
PDS5A_HUMAN	Sister chromatid cohesion protein PDS5 homolog A	CM	152369	8.15	15	15	7.7	7.7	8	8	0.02	8	1	1	4.3	1.79													8
PDZD1_HUMAN	PDZ domain-containing protein 1	CM	57414	5.36	30	30	8.9	8.9	4	4	0.06	4	1	1	11.3	0.79													4
PEBP1_HUMAN	Phosphatidylethanolamine-binding protein 1	CM / IMAC	21171	7.01	44	109	20.9308	36.9	3.5	6	0.41	21	29	19	56.7	0.65								3				1	5	6						2								4	6	3	3	1
PELP1_HUMAN	Proline-, glutamic acid- and leucine-rich protein 1	IMAC	120953	4.29	22	22	5.2	5.2	2	2	0.03	2	1	1	2.5	2.08
PEPA_HUMAN	Pepsin A precursor	CM	42376	4.16	24	27	8.25	9.5	7.5	17	0.14	30	4	4	28.3	0.34																															17	3
PEPC_HUMAN	Gastricsin precursor	CM	42825	4.36	28	28	2.6	2.6	2	2	0.09	2	1	1	16.3	0.16																															2
PERI_HUMAN	Peripherin	IMAC	53764	5.37	44	44	9.4	9.4	3	3	0.07	3	1	1	5.6	1.68												3
PERL_HUMAN	Lactoperoxidase precursor	CM	81200	8.89	19	19	7.2	7.2	5	5	0.05	5	1	1	12.3	0.59
PERM_HUMAN	Myeloperoxidase precursor	CM / IMAC	84838	9.19	35	90	7.6	11.1	5.4	9	0.11	27	5	4	17.7	0.63								7				2						9														4
PEX16_HUMAN	Peroxisomal membrane protein PEX16	CM	38629	9.85	19	19	1.5	1.5	1	1		1	1	1	21.5	0.07
PF21A_HUMAN	PHD finger protein 21A	CM	75481		14	14			1	1	0.05	1	1	1	4
PGAM1_HUMAN	Phosphoglycerate mutase 1	CM	28918	6.67	29	35	13	13	3.5	4	0.13	7	2	2	41.5	0.31																															3
PGAM2_HUMAN	Phosphoglycerate mutase 2	CM	28937	8.99	22	22	9.5	9.5	3	3	0.13	3	1	1	24.2	0.39																															3
PGBM_HUMAN	Basement membrane-specific heparan sulfate proteoglycan core protein precursor	CM / IMAC	479546	6.06	73	198	3.16774	6.4	16.8	33	0.05	421	79	47	3.1	2.06	13		33	15			8					17	15	13	13	9	32	18	7	21	18		6		9	11	11	31	26	16	21	22	7
PGCP_HUMAN	Plasma glutamate carboxypeptidase precursor	CM	52115	5.79	28	32	5.55	9.5	3.3	6	0.11	13	5	4	23	0.41												2																			6
PGDH_HUMAN	15-hydroxyprostaglandin dehydrogenase [NAD+]	CM / IMAC	29205	5.56	31	38	9.8	11.3	3	4	0.21	9	5	5	41.1	0.27														2															3	2
PGFRB_HUMAN	Beta-type platelet-derived growth factor receptor precursor	CM	125051	4.88	24	24	9.4	9.4	7	7	0.03	7	1	1	8	1.18			7
PGK1_HUMAN	Phosphoglycerate kinase 1	CM / IMAC	45014	8.3	36	51	15.45	18.9	6.3	10	0.13	25	4	4	26.7	0.71								5				10						3													7
PGK2_HUMAN	Phosphoglycerate kinase 2	IMAC	45195		24	24			3	3	0.08	3	1	1	8.9																			3
PGM1_HUMAN	Phosphoglucomutase-1	IMAC	61734	6.3	26	26	7.7	7.7	2	2	0.06	2	1	1	4.9	1.57
PGRP_HUMAN	Peptidoglycan recognition protein precursor	CM	22130	8.92	23	23	4.1	4.1	1	1	0.17	1	1	1	29.4	0.14																											1
PHF2_HUMAN	PHD finger protein 2	IMAC	120775	9.25	31	31	3.5	3.5	3	3		3	1	1	7.5	0.47																		3
PHS_HUMAN	Pterin-4-alpha-carbinolamine dehydratase	CM / IMAC	12057	6.28	32	40	23.1	23.1	6	9	0.33	18	4	4	99.5	0.23								4						4
PI16_HUMAN	Peptidase inhibitor 16 precursor	CM / IMAC	50155	5.24	27	36	5.575	9.3	2.5	4	0.11	10	20	16	29.9	0.31			2									3	1		4	2	1	2											2	3	2	2
PICK1_HUMAN	PRKCA-binding protein	CM	47056	5.17	30	30	2.7	2.7	2	2	0.08	2	1	1	13.8	0.2													2
PIGR_HUMAN	Polymeric immunoglobulin receptor precursor	CM	84481	5.58	32	54	9.45	13.1	7.5	13	0.07	30	5	5	14.2	0.92																	13
PIGT_HUMAN	GPI transamidase component PIG-T precursor	IMAC	66269	8.64	27	27	1.9	1.9	4	4	0.06	4	1	1	21.1	0.09				4
PIMT_HUMAN	Protein-L-isoaspartate(D-aspartate) O-methyltransferase	IMAC	24821	6.7	40	40	6.2	6.2	2	2	0.15	2	1	1	16.1	0.39																		2
PIP_HUMAN	Prolactin-inducible protein precursor	CM / IMAC	16858	8.26	29	34	17.8	32.9	3.3	6	0.37	10	3	3	83	0.4				1
PKD1_HUMAN	Polycystin-1 precursor	CM	467983	6.27	22	22	2.6	2.6	11	11	0.01	11	1	1	1.5	1.73																															11
PKHG2_HUMAN	Pleckstrin homology domain-containing family G member 2	CM	149282	5.57	25	27	3.25	4	4.5	5	0.02	9	2	2	6.7	0.6
PKHM1_HUMAN	Pleckstrin homology domain-containing family M member 1	CM	119439	6.08	28	28	2	2	3	3	0.03	3	1	1	5.4	0.37													3
PKP1_HUMAN	Plakophilin-1	CM / IMAC	84172	9.29	32	41	5.5	5.5	4.5	6	0.04	9	3	3	6.5	0.85		6															3
PLA1A_HUMAN	Phospholipase A1 member A precursor	IMAC	50628	7.11	28	29	4.23333	6.4	25.7	29	0.07	77	3	3	5.9	1.08									29
PLAK_HUMAN	Junction plakoglobin	CM / IMAC	82428	5.95	42	82	12.96	26.7	8.8	20	0.13	44	6	6	12.1	2.21									6			6					20
PLCB3_HUMAN	1-phosphatidylinositol-4,5-bisphosphate phosphodiesterase beta-3	CM	139596	5.68	16	16	4.4	4.4	3	3		3	1	1	4.7	0.94													3
PLEK_HUMAN	Pleckstrin	CM	40496	8.5	15	15	5.7	5.7	4	4		4	1	1	16.1	0.35																														4
PLK4_HUMAN	Serine/threonine-protein kinase PLK4	IMAC	109712		30	30			4	4	0.03	4	1	1	3.6																			4
PLMN_HUMAN	Plasminogen precursor	CM	93307	7.04	25	37	4.24286	7.4	3.8	8	0.04	23	12	11	12.9	0.57			5														3			2											4	5
PLSL_HUMAN	Plastin-2	CM / IMAC	70859	5.2	32	41	10.875	17.4	5.7	8	0.05	17	5	3	21.2	0.82																		4													8
PLXA1_HUMAN	Plexin-A1 precursor	CM	214222	6.54	18	18	2.8	2.8	7	7	0.02	7	1	1	3.3	0.85																															7
PLXA4_HUMAN	Plexin-A4 precursor	CM	215819	6.42	16	16	1.2	1.2	2	2	0.02	2	1	1	2.1	0.57																				2
PM14_HUMAN	Pre-mRNA branch site protein p14	IMAC	14699	9.41	26	26	20.8	20.8	2	2	0.27	2	1	1	102	0.2																		2
PMS1_HUMAN	PMS1 protein homolog 1	CM	106685		21	21			2	2	0.03	2	1	1	11.2
POTAC_HUMAN	Chimeric POTE-actin protein	CM / IMAC	123024	5.86	36	74	6.13529	9.6	8.7	21	0.06	96	26	18	12.2	0.79								21				11	3	6			5	10		8									4		14	8
PPAL_HUMAN	Lysosomal acid phosphatase precursor	CM / IMAC	48743	6.28	27	40	7.33333	9	3.5	5	0.12	14	7	7	24.6	0.37												4								2
PPAP_HUMAN	Prostatic acid phosphatase precursor	CM	44908	5.83	34	44	7.06	10.4	3.3	7	0.08	13	6	6	26.7	0.39								7																							2	2
PPGB_HUMAN	Lysosomal protective protein precursor	CM	54979	6.16	26	40	4.45	6.2	3	4	0.11	9	4	4	21.8	0.28							2										4														3
PPIA_HUMAN	Peptidyl-prolyl cis-trans isomerase A	CM / IMAC	18240	7.68	29	51	19.7	23	5.2	12	0.34	26	8	6	65.8	0.35								4						3															5
PPIB_HUMAN	Peptidyl-prolyl cis-trans isomerase B precursor	CM	22799		28	28			2	2	0.17	2	1	1	52.6
PPIC_HUMAN	Peptidyl-prolyl cis-trans isomerase C	CM	22877		22	22			4	4	0.17	4	1	1	52.5									4
PPM1D_HUMAN	Protein phosphatase 1D	CM	67416	9.14	14	14	15.5	15.5	6	6	0.06	6	1	1	14.8	1.05																															6
PPM1E_HUMAN	Protein phosphatase 1E	IMAC	86154		18	18			2	2	0.04	2	1	1	4.6							2
PR285_HUMAN	Peroxisomal proliferator-activated receptor A-interacting complex 285 kDa protein	IMAC	298354	7.36	19	19	0.7	0.7	2	2	0.01	2	1	1	1.3	0.54
PRD13_HUMAN	PR domain zinc finger protein 13	IMAC	76086		15	15			2	2	0.05	2	1	1	5.3																			2
PRD15_HUMAN	PR domain zinc finger protein 15	CM	172234		24	24			14	14	0.02	14	1	1	4.8																																14
PRDX1_HUMAN	Peroxiredoxin-1	CM / IMAC	22338	8.27	29	40	18.4	31.7	3.8	7	0.39	15	7	6	67.2	0.47												7		7	1			4											7
PRDX2_HUMAN	Peroxiredoxin-2	CM / IMAC	22063	5.66	28	33	14.9667	21.2	4	8	0.17	12	4	4	68	0.31								3				8			1			3
PRDX3_HUMAN	Thioredoxin-dependent peroxide reductase, mitochondrial precursor	CM	28035		19	19			2	2	0.13	2	1	1	42.8									2
PRDX4_HUMAN	Peroxiredoxin-4	CM	30768		24	24			3	3	0.12	3	1	1	39
PRDX5_HUMAN	Peroxiredoxin-5, mitochondrial precursor	CM	22311	8.85	33	34	18.7	18.7	3	3	0.27	3	2	2	53.8	0.35																															3
PRDX6_HUMAN	Peroxiredoxin-6	CM	25149		43	43			4	4	0.15	4	1	1	47.7
PREY_HUMAN	Protein preY, mitochondrial precursor	CM	12826	9.45	31	31	7.9	7.9	1	1	0.31	1	1	1	50.7	0.16																											1
PRIC1_HUMAN	Prickle-like protein 1	IMAC	96239	5.84	27	27	3.7	3.7	3	3	0.04	3	1	1	9.4	0.39
PRIC4_HUMAN	Prickle-like protein 4	CM	37551		19	19			2	2		2	1	1	8
PRKDC_HUMAN	DNA-dependent protein kinase catalytic subunit	CM	474047	6.75	15	15	2.8	2.8	10	10	0.01	10	1	1	1.8	1.56
PROF1_HUMAN	Profilin-1	CM / IMAC	15225	8.44	31	57	27.5909	50.7	4.6	8	0.61	32	25	18	98.5	0.51	1							8						5				2			1					1	3		6	3	7	3
PROX1_HUMAN	Homeobox prospero-like protein PROX1	IMAC	83830	6.74	20	25	2.4	2.4	4	6	0.04	8	2	2	10.7	0.22																				2
PRPS2_HUMAN	Ribose-phosphate pyrophosphokinase 2	IMAC	35168	6.15	19	19	5.7	5.7	2	2		2	1	1	39.8	0.14
PRR16_HUMAN	Proline-rich protein 16	IMAC	32812	9.09	27	27	1.6	1.6	7	7		7	1	1	9.1	0.18									7
PRRT3_HUMAN	Proline-rich transmembrane protein 3 precursor	IMAC	102767		18	18			3	3	0.04	3	1	1	3.9																			3
PRSS8_HUMAN	Prostasin precursor	CM	37116	5.51	33	51	5.1	6.1	1.5	2	0.1	3	3	2	26.9	0.23
PRTN3_HUMAN	Myeloblastin precursor	CM / IMAC	28263	8.72	29	33	10.35	17.2	3	5	0.13	12	6	4	53.1	0.32	2							4										5
PSA_HUMAN	Puromycin-sensitive aminopeptidase	CM	103960	5.49	30	30	3.6	3.6	8	8	0.04	8	1	1	6.3	0.57													8
PSA5_HUMAN	Proteasome subunit alpha type-5	IMAC	26582	4.74	14	14	8.7	8.7	1	1	0.14	1	1	1	15	0.58		1
PSB1_HUMAN	Proteasome subunit beta type-1 precursor	CM	26717		17	17			1	1	0.14	1	1	1	11.2																																		1
PTGDS_HUMAN	Prostaglandin-H2 D-isomerase precursor	CM / IMAC	21257	7.66	47	102	21.26	30.5	6.4	13	0.54	70	65	42	70.6	0.43		1	6				2	3				3	3	2	4	1	9	4	2	3	2	3		1		1	2	8	2	4	13	5	3
PTPRS_HUMAN	Receptor-type tyrosine-protein phosphatase S precursor	CM	218290	6.09	27	40	3.2	3.7	7.6	12	0.03	38	7	7	5.5	0.67																	12							7						8
PTPRU_HUMAN	Receptor-type tyrosine-protein phosphatase U precursor	IMAC	162423		19	19	0.7	0.7	4	4		4	1	1	2.5	0.28
PUM1_HUMAN	Pumilio homolog 1	CM	127156	6.35	17	17	1.3	1.3	1	1	0.03	1	1	1	5.1	0.25															1
PUS7_HUMAN	Pseudouridylate synthase 7 homolog	IMAC	75377	5.98	26	26	2.7	2.7	4	4	0.05	4	1	1	4	0.68
PVRL2_HUMAN	Poliovirus receptor-related protein 2 precursor	CM	58198	4.74	35	44	7.6	7.6	7	8	0.13	14	2	2	20.6	0.37																	8
PVRL4_HUMAN	Poliovirus receptor-related protein 4 precursor	CM	55967	5.23	21	21	5.9	5.9	2	2	0.07	2	1	1	12.5	0.47																															2
PXMP4_HUMAN	Peroxisomal membrane protein 4	CM	24264	10.07	14	14	3.3	3.3	1	1	0.16	1	1	1	41.2	0.08			1
PYGL_HUMAN	Glycogen phosphorylase, liver form	CM	97547	6.71	17	17	7.9	7.9	9	9	0.04	9	1	1	10.3	0.77																															9
PYRD_HUMAN	Dihydroorotate dehydrogenase, mitochondrial precursor	CM	42867	9.66	30	30	11.1	11.1	3	3		3	1	1	15.2	0.73													3
PZP_HUMAN	Pregnancy zone protein precursor	CM / IMAC	165317	5.97	23	24	1.6	1.6	3	4	0.02	6	2	2	9.1	0.18								4										2
PZRN4_HUMAN	PDZ domain-containing RING finger protein 4	IMAC	117103	5.61	16	16	6.4	6.4	13	13		13	1	1	2.6	2.46
QPCT_HUMAN	Glutaminyl-peptide cyclotransferase precursor	CM / IMAC	40990	6.12	30	40	4.73333	6.1	2.3	4	0.09	7	11	10	29.3	0.21			4															2
QSOX1_HUMAN	Sulfhydryl oxidase 1 precursor	CM	83375	9.13	31	48	4.85	9	4	5	0.07	12	4	3	12	0.75			5
RAB13_HUMAN	Ras-related protein Rab-13	CM	23002	9.27	31	31	4.9	4.9	7	7		7	1	1	30.4	0.16
RAB32_HUMAN	Ras-related protein Rab-32	CM	25225	6.08	17	17	12	12	2	2	0.15	2	1	1	39.6	0.3
RAB3I_HUMAN	RAB3A-interacting protein	CM	53705	5.73	30	30	4.8	4.8	4	4		4	1	1	12.1	0.4													4
RAB5C_HUMAN	Ras-related protein Rab-5C	IMAC	23710		31	31			1	1	0.16	1	1	1	16.9
RAB7A_HUMAN	Ras-related protein Rab-7a	CM	23775	6.4	29	39	6.8	6.8	1.5	2	0.16	3	2	2	50.5	0.13														2
RADI_HUMAN	Radixin	CM	68677		25	25			7	7	0.05	7	1	1	12.1																																7
RAI1_HUMAN	Retinoic acid-induced protein 1	CM	206317	9.03	30	30	2.6	2.6	4	4		4	1	1	3.2	0.81													4
RASF3_HUMAN	Ras association domain-containing protein 3	CM	27790	7.02	26	26	6.3	6.3	2	2	0.14	2	1	1	25.2	0.25
RASL2_HUMAN	Ras GTPase-activating protein 4	IMAC	91483		15	15			4	4	0.04	4	1	1	4.4
RB11A_HUMAN	Ras-related protein Rab-11A	CM	24507		31	31			1.5	2	0.16	3	2	2	49															1
RB11B_HUMAN	Ras-related protein Rab-11B	CM	24602		27	31			1.5	2	0.15	3	3	3	48.8															1
RB3GP_HUMAN	Rab3 GTPase-activating protein catalytic subunit	IMAC	111663	5.38	15	15	3	3	5	5	0.03	5	1	1	8.1	0.37																				5
RBM23_HUMAN	Probable RNA-binding protein 23	IMAC	48731	9.86	22	22	5.5	5.5	3	3		3	1	1	18.5	0.3																		3
RBNS5_HUMAN	Rabenosyn-5	IMAC	89667	5.36	26	29	5.8	7.9	40	41	0.04	80	3	3	3.3	2.39									39
RED1_HUMAN	Double-stranded RNA-specific editase 1	CM / IMAC	81162	9.11	16	17	4.6	4.6	2.5	3	0.05	5	2	2	8	0.58																											2
REG1A_HUMAN	Lithostathine 1 alpha precursor	CM	19130	5.65	32	60	12.0333	18.1	3.3	5	0.58	10	4	4	62.7	0.29			2														5															3
REG1B_HUMAN	Lithostathine 1 beta precursor	CM	19064		29	34	7.2	7.2	3.5	4	0.44	7	2	2	62.9	0.11																	4															3
RENT1_HUMAN	Regulator of nonsense transcripts 1	CM	125656	6.18	16	16	4.5	4.5	3	3	0.03	3	1	1	8	0.56																															3
REPS1_HUMAN	RalBP1-associated Eps domain-containing protein 1	CM	80882		16	16			2	2	0.05	2	1	1	14.8
RETBP_HUMAN	Plasma retinol-binding protein precursor	CM	23352	5.76	28	46	12.2857	19.9	9.7	31	0.56	97	13	12	51.4	0.39							2	10						4	2		31								1	10						17
RETN_HUMAN	Resistin precursor	CM / IMAC	12104	6.51	31	45	22.2333	35.2	2	3	0.33	6	30	22	123.9	0.28								1				1	1	1				1		1							1				2	3
RFIP1_HUMAN	Rab11 family-interacting protein 1	CM / IMAC	137593	5.32	15	16	1.06667	1.9	6	7	0.03	18	3	3	10.9	0.17																		7
RFX2_HUMAN	DNA-binding protein RFX2	CM	80402		33	33			2	2	0.05	2	1	1	14.9
RGL1_HUMAN	Ral guanine nucleotide dissociation stimulator-like 1	IMAC	87670	5.78	31	31	6.2	6.2	5	5	0.04	5	1	1	3.4	1.82												5
RGS14_HUMAN	Regulator of G-protein signaling 14	CM	65492	9.11	19	19	7.2	7.2	6	6	0.06	6	1	1	8.4	0.86
RGS20_HUMAN	Regulator of G-protein signaling 20	CM	44319	6.48	26	26	2.8	2.8	1	1	0.08	1	1	1	22.6	0.12
RHG01_HUMAN	Rho GTPase-activating protein 1	IMAC	50492		17	17			1	1	0.07	1	1	1	7.9
RHG06_HUMAN	Rho GTPase-activating protein 6	CM / IMAC	106688	7	18	19	2.75	4.4	3.5	5		7	2	2	13.1	0.34																																5
RHG08_HUMAN	Rho GTPase-activating protein 8	CM	53768	9.45	19	19	4.7	4.7	3	3	0.07	3	1	1	12.1	0.39
RHG09_HUMAN	Rho GTPase-activating protein 9	IMAC	83943	8.65	39	39	6.4	6.4	5	5	0.04	5	1	1	3.6	1.78												5
RHG21_HUMAN	Rho GTPase-activating protein 21	CM	218698	7.85	19	19	1.7	1.7	2	2	0.02	2	1	1	3	0.57
RHG23_HUMAN	Rho GTPase-activating protein 23	CM	163445	9.31	20	20	2.5	2.5	6	6	0.02	6	1	1	4	0.63													6
RHPN1_HUMAN	Rhophilin-1	CM	77204	7.88	30	30	5.2	5.2	3	3	0.05	3	1	1	8.4	0.62													3
RICTR_HUMAN	Rapamycin-insensitive companion of mTOR	CM	194326	7.23	15	15	3.2	3.2	6	6	0.02	6	1	1	5.1	0.63																															6
RINT1_HUMAN	RAD50-interacting protein 1	CM	91429	5.29	18	18	2.1	2.1	1	1	0.04	1	1	1	7.1	0.3															1
RISC_HUMAN	Retinoid-inducible serine carboxypeptidase precursor	CM	51115	5.61	31	31	6.9	6.9	3	3	0.07	3	1	1	12.7	0.54
RN123_HUMAN	E3 ubiquitin-protein ligase RNF123	IMAC	150053	6.31	27	27	3	3	6	6	0.02	6	1	1	2	1.5
RN19B_HUMAN	E3 ubiquitin-protein ligase RNF19B	CM	79921	5.81	31	31	5.1	5.1	9	9		9	1	1	8.8	0.58
RNAS2_HUMAN	Non-secretory ribonuclease precursor	CM	18867	9.1	23	30	9.53333	10.6	3.3	5	0.2	13	7	7	63.6	0.17																	3
RNAS4_HUMAN	Ribonuclease 4 precursor	IMAC	17297	9.3	19	19	4.1	4.1	1	1	0.22	1	1	1	80.9	0.05
RNF14_HUMAN	E3 ubiquitin-protein ligase RNF14	IMAC	55663		16	16			1	1	0.07	1	1	1	7.2																			1
RNT2_HUMAN	Ribonuclease T2 precursor	CM	30108	6.66	21	23	11.7	11.7	2.3	4	0.13	7	3	2	39.9	0.29														1																	4
ROBO4_HUMAN	Roundabout homolog 4 precursor	CM	108483	6.18	34	56	5.72222	9.6	5.6	8	0.05	28	13	11	11.1	0.86			6												6
RPA1_HUMAN	DNA-directed RNA polymerase I subunit RPA1	IMAC	196186		20	20			6	6	0.02	6	1	1	2																			6
RPGF6_HUMAN	Rap guanine nucleotide exchange factor 6	CM	180945	6	19	19	1.2	1.2	1	1	0.02	1	1	1	3.6	0.33
RPGR1_HUMAN	X-linked retinitis pigmentosa GTPase regulator-interacting protein 1	CM / IMAC	147420	5.49	26	26	4.05	6	6.5	9	0.02	13	2	2	6.8	0.88
RPH3L_HUMAN	Rab effector Noc2	IMAC	34464		15	15			2	2		2	1	1	11.6
RPOM_HUMAN	DNA-directed RNA polymerase, mitochondrial precursor	IMAC	140387	9.19	19	19	3.6	3.6	5	5	0.03	5	1	1	6.4	0.56																													5
RPTOR_HUMAN	Regulatory-associated protein of mTOR	IMAC	150747	6.43	33	33	2.5	2.5	4	4	0.02	4	1	1	6	0.42																					4
RRP12_HUMAN	RRP12-like protein	CM	145127	8.97	14	14	4.2	4.2	9	9	0.03	9	1	1	4.8	0.88																															9
RRP15_HUMAN	RRP15-like protein	CM	31484	5.39	18	18	1.8	1.8	1	1		1	1	1	31.8	0.06
RS13_HUMAN	40S ribosomal protein S13	IMAC	17222	10.53	17	17	15.9	15.9	4	4		4	1	1	52.3	0.3																				4
RS7_HUMAN	40S ribosomal protein S7	IMAC	22127	10.09	28	28	2.6	2.6	1	1		1	1	1	40.7	0.06																					1
RSSA_HUMAN	40S ribosomal protein SA	CM	32968		51	51			4	4	0.24	4	1	1	36.4
RYR1_HUMAN	Ryanodine receptor 1	IMAC	570874	5.18	15	15	1.9	1.9	8	8	0.01	8	1	1	0.4	4.75										8
S100P_HUMAN	Protein S100-P	CM / IMAC	10457	4.75	30	52	32.42	52.6	5.8	11	0.38	29	7	5	95.6	0.55																		2													6
S10A2_HUMAN	Protein S100-A2	CM	11345	4.68	23	23	18.85	21.4	2	3	0.35	4	2	1	88.1	0.24																				3
S10A4_HUMAN	Protein S100-A4	CM / IMAC	11957	5.85	36	45	45.5	45.5	6	8	0.55	12	2	2	100.4	0.45																		8
S10A6_HUMAN	Protein S100-A6	CM / IMAC	10237	5.33	47	81	25.5571	32.2	10.6	25	0.67	85	12	9	97.7	0.33																		4		7												25
S10A7_HUMAN	Protein S100-A7	CM / IMAC	11571	6.27	35	87	23.1167	35.6	3.3	5	0.58	10	10	6	103.7	0.34												5					2			5
S10A8_HUMAN	Protein S100-A8	CM / IMAC	10891	6.51	49	140	43.2267	89.2	16.8	69	2.84	302	36	26	137.7	0.65	27				5			49				2		4			13	37		69	3							3	14		13	3
S10A9_HUMAN	Protein S100-A9	CM / IMAC	13299	5.71	57	163	40.1938	56.1	13	42	1.73	247	49	32	112.8	0.5	16	1			3	4		18				3		1			7	42		23	28							7	11		11	7
S10AA_HUMAN	Protein S100-A10	IMAC	11317	6.82	24	24	27.8	27.8	6	6	0.35	6	1	1	79.5	0.35																				6
S10AC_HUMAN	Protein S100-A12	IMAC	10575		29	29			7	7	0.38	7	1	1	37.8
S10AG_HUMAN	Protein S100-A16	IMAC	11858	6.28	20	20	26.2	26.2	2	2	0.33	2	1	1	75.9	0.35																				2
S11Y_HUMAN	Putative S100 calcium-binding protein H_NH0456N16.1	CM	11680		49	49			4	4	0.34	4	1	1	102.7																		4
S1A7A_HUMAN	Protein S100-A7A	CM	11419		20	20			2	2		2	1	1	105.1																		2
S26A6_HUMAN	Solute carrier family 26 member 6	IMAC	83422		15	15			3	3	0.04	3	1	1	4.8																			3
S3TC1_HUMAN	SH3 domain and tetratricopeptide repeats-containing protein 1	CM	148639		15	15			5	5	0.02	5	1	1	8.1
SAA_HUMAN	Serum amyloid A protein precursor	CM / IMAC	13589		36	61			3.3	5	0.48	13	4	3	88.3															1			5
SAMP_HUMAN	Serum amyloid P-component precursor	CM	25501		20	20			3	3	0.32	3	1	1	47.1
SAP3_HUMAN	Ganglioside GM2 activator precursor	CM	21295		59	59			10	10	0.64	10	1	1	56.4																		10
SARM1_HUMAN	Sterile alpha and TIR motif-containing protein 1	CM	80414	6.14	24	30	2.8	3.5	3	3	0.05	3	2	2	10.3	0.34													3							3
SBP1_HUMAN	Selenium-binding protein 1	CM	52961	5.93	36	57	10.15	18.4	5.6	13	0.11	28	9	6	18.9	0.97							3					3																			2	9
SC24C_HUMAN	Protein transport protein Sec24C	IMAC	118325	6.71	27	27	3.1	3.1	4	4		4	1	1	2.5	1.24												4
SCEL_HUMAN	Sciellin	CM	75810	9.38	29	29	3.1	3.1	2	2	0.05	2	1	1	13.2	0.23																				2
SCN7A_HUMAN	Sodium channel protein type 7 subunit alpha	CM	195753	8.26	14	14	4.5	4.5	8	8	0.02	8	1	1	3.6	1.25																															8
SCNNG_HUMAN	Amiloride-sensitive sodium channel subunit gamma	CM	75525	7.46	28	38	2.36667	2.9	1.5	2	0.05	3	7	7	9.3	0.31												1	2							1						1	1				2
SCOT_HUMAN	Succinyl-CoA:3-ketoacid-coenzyme A transferase 1, mitochondrial precursor	IMAC	56613	7.14	28	28	9.6	9.6	4	4	0.07	4	1	1	26.5	0.36																		4
SCTM1_HUMAN	Secreted and transmembrane protein 1 precursor	CM / IMAC	27324	7	57	134	13.15	21.8	3.7	7	0.37	22	45	29	54.9	0.4			3	1				1					2	2			5	2		3	3							3	7		4	3
SDF1_HUMAN	Stromal cell-derived factor 1 precursor	CM	10951		16	16			2	2	0.36	2	1	1	109.6									2
SEC63_HUMAN	Translocation protein SEC63 homolog	CM / IMAC	88395	5.21	23	32	1.525	2.5	8.3	13	0.04	33	7	7	17	0.15												5						7		8
SEMG1_HUMAN	Semenogelin-1 precursor	CM / IMAC	52187	9.3	66	258	23.8222	58.9	23.6	66	0.56	189	10	9	26.8	2.2				66				8		12	14
SEMG2_HUMAN	Semenogelin-2 precursor	CM / IMAC	65558	9.08	55	123	18.75	31.4	13.8	38	0.21	83	8	6	21.4	1.47				38						10	10
SENP5_HUMAN	Sentrin-specific protease 5	CM	88044	9.3	14	14	4.8	4.8	3	3	0.04	3	1	1	7.4	0.65
SEPT6_HUMAN	Septin-6	IMAC	50115	6.24	24	24	9.9	9.9	3	3	0.07	3	1	1	29.9	0.33																		3
SFR11_HUMAN	Splicing factor arginine/serine-rich 11	CM	53656	10.52	14	14	1	1	1	1		1	1	1	18.6	0.05
SFR18_HUMAN	Splicing factor, arginine/serine-rich 18	CM	92577	10.02	19	19	2	2	3	3		3	1	1	9	0.22
SFRIP_HUMAN	SFRS2-interacting protein	IMAC	164652		30	30			4	4		4	1	1	2.4																			4
SH3BG_HUMAN	SH3 domain-binding glutamic acid-rich protein	CM	26086		25	25			3	3		3	1	1	46																		3
SH3L1_HUMAN	SH3 domain-binding glutamic acid-rich-like protein	CM	12774		26	26			8	8	0.31	8	1	1	93.9																		8
SH3L3_HUMAN	SH3 domain-binding glutamic acid-rich-like protein 3	CM / IMAC	10495	4.82	40	76	28.1143	39.8	5.1	13	1.39	36	27	22	114.3	0.35								1				3	2	3			13			1				1					3		8	4	1
SHOC2_HUMAN	Leucine-rich repeat protein SHOC-2	IMAC	65344	8.65	15	15	3.6	3.6	23	23	0.06	23	1	1	6.1	0.59
SIAE_HUMAN	Sialate O-acetylesterase precursor	CM	58999	6.93	34	40	4.8	4.8	1.5	2	0.06	3	2	2	20.3	0.24							2										1
SIRB1_HUMAN	Signal regulatory protein beta-1 precursor	CM	43711	6.07	31	31	7.5	7.5	3	3	0.09	3	1	1	22.9	0.33			3
SIRT5_HUMAN	NAD-dependent deacetylase sirtuin-5	CM	34565	8.82	22	22	4.2	4.2	1	1	0.11	1	1	1	28.9	0.15
SIX3_HUMAN	Homeobox protein SIX3	CM	35771		18	18			9	9	0.11	9	1	1	33.5									9
SIX6_HUMAN	Homeobox protein SIX6	CM	27687		18	18			9	9		9	1	1	43.3									9
SKT_HUMAN	Sickle tail protein homolog	CM	214741	6.59	16	16	4.7	4.7	8	8	0.02	8	1	1	3.9	1.21																																8
SLAF5_HUMAN	SLAM family member 5 precursor	IMAC	38782	6.61	15	15	1.4	1.4	1	1		1	1	1	10.3	0.14		1
SLK_HUMAN	STE20-like serine/threonine-protein kinase	CM	143321		16	16			1	1	0.03	1	1	1	8.4
SMAD6_HUMAN	Mothers against decapentaplegic homolog 6	CM	54352	8.46	16	16	1.6	1.6	1	1		1	1	1	12	0.13													1
SMC1B_HUMAN	Structural maintenance of chromosomes protein 1B	IMAC	145161		19	19			1	1	0.03	1	1	1	2.8							1
SMO_HUMAN	Smoothened homolog precursor	CM	87879		22	22			2	2	0.04	2	1	1	13.7									2
SMS1_HUMAN	Phosphatidylcholine:ceramide cholinephosphotransferase 1	CM / IMAC	49778	8.66	22	27	1.55	1.9	6.8	11		27	4	4	14.1	0.13																														5			7
SNCAP_HUMAN	Synphilin-1	CM	101350	5.95	27	27	3.9	3.9	2	2	0.04	2	1	1	4.4	0.89
SNIP1_HUMAN	Smad nuclear-interacting protein 1	IMAC	45834	10	18	18	10.1	10.1	3	3	0.08	3	1	1	5.5	1.84																							3
SNPC4_HUMAN	snRNA-activating protein complex subunit 4	CM / IMAC	160230	8.51	16	17	2.1	3.5	2.5	3	0.02	5	2	2	6.2	0.56											2
SNUT1_HUMAN	U4/U6.U5 tri-snRNP-associated protein 1	IMAC	90425	5.89	16	16	1.8	1.8	5	5		5	1	1	15.5	0.12
SNX11_HUMAN	Sorting nexin-11	CM	30890	6.61	15	15	6.3	6.3	1	1	0.12	1	1	1	22.7	0.28
SNX16_HUMAN	Sorting nexin-16	IMAC	39451		16	16			3	3	0.1	3	1	1	10.1
SODE_HUMAN	Extracellular superoxide dismutase [Cu-Zn] precursor	CM / IMAC	26307	6.14	19	20	10	13.3	2	3	0.14	4	2	2	38	0.35			3																		1
SON_HUMAN	SON protein	CM / IMAC	264243	5.5	27	27	2.25	3.5	6.5	8	0.01	13	2	2	3.4	1.03																													8
SOS2_HUMAN	Son of sevenless homolog 2	IMAC	154456	6.44	24	27	3.8	4.3	10	12	0.02	20	2	2	5.8	0.74												12								8
SOX5_HUMAN	Transcription factor SOX-5	CM	84253		21	21			2	2	0.04	2	1	1	14.2																		2
SP16H_HUMAN	FACT complex subunit SPT16	CM	120483	5.5	14	14	3.4	3.4	3	3	0.03	3	1	1	8.3	0.41
SPB12_HUMAN	Serpin B12	CM / IMAC	46675	5.36	28	33	3	3	3.5	6	0.13	7	2	2	21.4	0.14																	6
SPB3_HUMAN	Serpin B3	CM / IMAC	44621	6.35	75	250	21.525	40	9.7	18	0.42	29	5	3	26.9	1.49												18								7
SPB4_HUMAN	Serpin B4	CM / IMAC	45025	5.86	87	142	13	24.4	6.3	12	0.23	19	3	2	22.2	1.1												12								6
SPEC1_HUMAN	Sperm antigen with calponin homology and coiled-coil domains 1	CM	119268	6.29	18	18	10.1	10.1	10	10	0.03	10	1	1	8.4	1.2
SPHM_HUMAN	N-sulphoglucosamine sulphohydrolase precursor	CM	57208	6.46	25	25	6.2	6.2	4	4	0.07	4	1	1	11.4	0.54
SPI2A_HUMAN	Spindlin-2A	IMAC	29302	6.72	17	17	14.3	14.3	3	3	0.13	3	1	1	30.7	0.47																													3
SPI2B_HUMAN	Spindlin-2B	IMAC	29272		17	17	14.3	14.3	3	3		3	1	1	30.7	0.47																													3
SPRL1_HUMAN	SPARC-like protein 1 precursor	CM	76071	4.68	21	21	1.7	1.7	1	1	0.05	1	1	1	13.1	0.13
SPRR3_HUMAN	Small proline-rich protein 3	CM / IMAC	18610	8.86	21	21	12.2333	18.3	2	3	0.21	6	3	1	53.7	0.34																				3
SPTA1_HUMAN	Spectrin alpha chain, erythrocyte	IMAC	281054	4.96	25	25	2.4	2.4	6	6	0.01	6	1	1	1.1	2.18
SPTA2_HUMAN	Spectrin alpha chain, brain	IMAC	285335	5.22	23	23	8.5	8.5	18	18	0.01	18	1	1	1.1	7.73
SPTB1_HUMAN	Spectrin beta chain, erythrocyte	IMAC	246468	5.13	26	26	3.9	3.9	8	8		8	1	1	1.2	3.25
SPTB2_HUMAN	Spectrin beta chain, brain 1	IMAC	275405	5.39	26	26	4.1	4.1	11	11	0.01	11	1	1	1.1	3.73
SPTCS_HUMAN	Spatacsin	CM	282798	5.63	19	19	1.2	1.2	3	3	0.01	3	1	1	3.5	0.34			3
SPTN5_HUMAN	Spectrin beta chain, brain 4	IMAC	419512	6.23	32	32	6.8	6.8	23	23	0.01	23	1	1	0.7	9.71												23
SQSTM_HUMAN	Sequestosome-1	IMAC	47687		16	16			2	2		2	1	1	8.4
SRP09_HUMAN	Signal recognition particle 9 kDa protein	CM	10226		30	42			1	1	0.39	1	2	2	117.3															1
SRP68_HUMAN	Signal recognition particle 68 kDa protein	IMAC	71242	8.75	18	18	2.6	2.6	2	2	0.05	2	1	1	12.6	0.21
ST14_HUMAN	Suppressor of tumorigenicity protein 14	CM / IMAC	97051	6.11	20	23	1.3	1.8	6.5	7	0.04	13	2	2	10.3	0.17																				7											6
ST1A1_HUMAN	Sulfotransferase 1A1	CM	34311	6.16	17	17	13.6	13.6	2	2	0.11	2	1	1	29.1	0.47			2
ST5_HUMAN	Suppression of tumorigenicity 5	IMAC	127695		18	18			5	5	0.03	5	1	1	3.1
STAB1_HUMAN	Stabilin-1 precursor	IMAC	287112	6.05	19	19	2.1	2.1	4	4	0.01	4	1	1	3.1	0.68																												4
STAC_HUMAN	SH3 and cysteine-rich domain-containing protein	IMAC	45181		16	16			2	2	0.08	2	1	1	8.9																		2
STAR9_HUMAN	StAR-related lipid transfer protein 9	IMAC	512391		15	15			7	7	0.01	7	1	1	0.8																		7
STCH_HUMAN	Stress 70 protein chaperone microsome-associated 60 kDa protein precursor	CM	51984		19	19			8	8	0.07	8	1	1	23.1									8
STIP1_HUMAN	Stress-induced-phosphoprotein 1	CM	63266	6.4	14	14	4.1	4.1	2	2	0.06	2	1	1	15.8	0.26
STRUM_HUMAN	Strumpellin	CM	135198	6.54	16	16	1.7	1.7	3	3	0.03	3	1	1	5.2	0.33																															3
SUHW2_HUMAN	Suppressor of hairy wing homolog 2	IMAC	61584	7.86	26	26	7.4	7.4	8	8		8	1	1	4.9	1.51
SULF2_HUMAN	Extracellular sulfatase Sulf-2 precursor	CM	101823	9.3	28	28	1.5	1.5	1	1	0.04	1	1	1	9.8	0.15
SUMO3_HUMAN	Small ubiquitin-related modifier 3 precursor	CM	11694		24	24			2	2	0.34	2	1	1	102.6
SV2C_HUMAN	Synaptic vesicle glycoprotein 2C	CM	83368	4.92	20	20	1	1	1	1	0.04	1	1	1	8.4	0.12
SYCP2_HUMAN	Synaptonemal complex protein 2	IMAC	177348		30	30			7	7	0.02	7	1	1	2.3																			7
SYGP1_HUMAN	Ras GTPase-activating protein SynGAP	CM	149252	9.12	17	19	4.7	7.8	5	7	0.02	10	2	2	6.7	1.16															7
SYMPK_HUMAN	Symplekin	IMAC	142003	5.82	25	25	3.6	3.6	4	4	0.03	4	1	1	2.1	1.71
SYNE1_HUMAN	Nesprin-1	CM	1017705	5.38	21	21	3	3	25	25	0	25	1	1	1	3
SYUG_HUMAN	Gamma-synuclein	CM	13331	4.89	29	56	24.975	47.2	2.7	5	0.49	8	4	3	75	0.63																														1
T132B_HUMAN	Transmembrane protein 132B	CM	120331	4.63	21	21	3.6	3.6	5	5		5	1	1	8.3	0.43
TAF3_HUMAN	Transcription initiation factor TFIID subunit 3	IMAC	103582		30	30			2	2		2	1	1	3.9																			2
TALDO_HUMAN	Transaldolase	CM	37711		21	21			4	4	0.1	4	1	1	31.8									4
TAP2_HUMAN	Antigen peptide transporter 2	CM	76233	8.24	16	16	2	2	1	1	0.05	1	1	1	13.1	0.15			1
TBA1A_HUMAN	Tubulin alpha-1A chain	CM	50820		29	29			4	4	0.15	4	1	1	23.6															4
TBA1B_HUMAN	Tubulin alpha-1B chain	CM	50836		29	29			4	4		4	1	1	23.6															4
TBA1C_HUMAN	Tubulin alpha-1C chain	CM	50579		29	29			4	4		4	1	1	23.7															4
TBA3C_HUMAN	Tubulin alpha-3C/D chain	CM	50644		14	14			3	3		3	1	1	23.7									3
TBA3E_HUMAN	Tubulin alpha-3E chain	CM	50658		14	14			3	3		3	1	1	23.7									3
TBA8_HUMAN	Tubulin alpha-8 chain	CM	50778		14	14			3	3	0.07	3	1	1	23.6									3
TBB3_HUMAN	Tubulin beta-3 chain	CM	50889		22	22			4	4	0.07	4	1	1	16.3																																4
TBC23_HUMAN	TBC1 domain family member 23	IMAC	79234	5.23	16	16	3.6	3.6	2	2	0.05	2	1	1	3.2	1.13																							2
TBCK_HUMAN	TBC domain-containing protein kinase-like protein	IMAC	102047		23	23			4	4	0.04	4	1	1	3.9		4
TBE_HUMAN	Tubulin epsilon chain	CM	52932	6.17	18	18	2.7	2.7	3	3		3	1	1	18.9	0.14
TBX1_HUMAN	T-box transcription factor TBX1	CM	43532	8.37	19	19	3.3	3.3	1	1	0.09	1	1	1	14.9	0.22																														1
TEAD2_HUMAN	Transcriptional enhancer factor TEF-4	CM	49584	6.06	29	32	5.6	8.5	2	3	0.08	4	2	2	16.7	0.51																																3
TENX_HUMAN	Tenascin-X precursor	CM	471469		21	21			14	14	0.01	14	1	1	1.8																																14
TERA_HUMAN	Transitional endoplasmic reticulum ATPase	CM	90005		17	17			3	3	0.04	3	1	1	13.3									3
TERT_HUMAN	Telomerase reverse transcriptase	CM	128650	10.54	14	14	1.8	1.8	3	3	0.03	3	1	1	4.3	0.42
TETN_HUMAN	Tetranectin precursor	CM	22966	5.52	40	48	9.4	12.9	1.5	2	0.17	3	4	4	52.3	0.25			1														2
TF7L1_HUMAN	Transcription factor 7-like 1	CM	62801	9	22	22	4.1	4.1	2	2	0.06	2	1	1	15.9	0.26			2
TFE3_HUMAN	Transcription factor E3	IMAC	61577	5.41	28	28	3.7	3.7	2	2	0.06	2	1	1	4.9	0.76
THBG_HUMAN	Thyroxine-binding globulin precursor	CM	46666	5.87	34	55	2.2	2.2	2.7	5	0.08	8	4	4	25.7	0.09			1					2									5
THIO_HUMAN	Thioredoxin	CM / IMAC	12023	4.82	26	34	9.55	10.5	2	3	0.33	4	3	3	74.9	0.14																		3		1
THOC1_HUMAN	THO complex subunit 1	CM	76407		16	16			3	3	0.05	3	1	1	15.7
THRB_HUMAN	Prothrombin precursor	IMAC	71519	5.64	37	37	9.6	9.6	6	6	0.05	6	1	1	4.2	2.29												6
TICN1_HUMAN	Testican-1 precursor	CM	50550	5.74	30	30	3.4	3.4	2	2	0.07	2	1	1	12.9	0.26													2
TITIN_HUMAN	Titin	CM / IMAC	3845466	6.01	21	27	4.23333	7.1	144.8	275	0	724	5	5	0.3	23.67												275					137			87									102		123
TLN1_HUMAN	Talin-1	IMAC	271932	5.77	28	28	3.4	3.4	7	7	0.01	7	1	1	5.5	0.62																		7
TMCO7_HUMAN	Transmembrane and coiled-coil domain-containing protein 7	CM	122287		17	17			2	2	0.03	2	1	1	9.8															2
TNNC2_HUMAN	Troponin C, skeletal muscle	CM	18179		29	29			1	1	0.21	1	1	1	16.5
TNNI2_HUMAN	Troponin I, fast skeletal muscle	CM	21509		30	30			3	3	0.18	3	1	1	13.9
TNR18_HUMAN	Tumor necrosis factor receptor superfamily member 18 precursor	IMAC	27369		23	23			3	3	0.14	3	1	1	14.6																		3
TNR21_HUMAN	Tumor necrosis factor receptor superfamily member 21 precursor	IMAC	73213	8.09	18	18	12.4	12.4	4	4	0.05	4	1	1	20.5	0.6																		4
TOP1M_HUMAN	DNA topoisomerase I, mitochondrial precursor	CM	70442	9.46	18	18	3.7	3.7	3	3	0.05	3	1	1	9.9	0.37
TOP3B_HUMAN	DNA topoisomerase 3-beta-1	CM	98601		16	16			6	6	0.04	6	1	1	12.2									6
TOPB1_HUMAN	DNA topoisomerase 2-binding protein 1	CM	172787	6.47	19	19	7.4	7.4	8	8	0.02	8	1	1	5.8	1.28
TPGS1_HUMAN	Tubulin polyglutamylase complex subunit 1	CM	31503	9.26	16	16	6.2	6.2	1	1	0.12	1	1	1	14.3	0.43												1
TPGS2_HUMAN	Tubulin polyglutamylase complex subunit 2	CM	33318		19	19			4	4		4	1	1	9
TPIS_HUMAN	Triosephosphate isomerase	CM / IMAC	26954	6.45	51	222	24.1308	58.2	9.2	30	0.86	92	22	15	51.9	1.12				3				3				30		3						3											4
TPP1_HUMAN	Tripeptidyl-peptidase 1 precursor	CM	61761	6.01	27	31	6.9	6.9	2	3	0.06	6	4	4	19.4	0.36														1
TPPC3_HUMAN	Trafficking protein particle complex subunit 3	CM	20445	4.88	31	31	2.8	2.8	5	5		5	1	1	34.2	0.08
TPT1L_HUMAN	TPT1-like protein	CM	15826	5.81	30	30	7.9	7.9	2	2		2	1	1	41.1	0.19													2
TRAK1_HUMAN	Trafficking kinesin-binding protein 1	CM	107008	5.59	19	19	4.4	4.4	4	4	0.03	4	1	1	9.3	0.47
TRFE_HUMAN	Serotransferrin precursor	CM / IMAC	79331	6.81	37	70	8.43571	13.8	8.5	16	0.13	93	20	15	18.9	0.73								14				3						10			6								7		9
TRFL_HUMAN	Lactotransferrin precursor	CM / IMAC	80064	8.5	36	71	12.6875	20	8.7	15	0.12	61	10	6	18.7	1.07												5						14													15
TRI13_HUMAN	Tripartite motif-containing protein 13	CM	47843	5.75	15	15	1.7	1.7	1	1	0.08	1	1	1	11.5	0.15
TRI29_HUMAN	Tripartite motif-containing protein 29	IMAC	66519		30	30			4	4	0.06	4	1	1	6																			4
TRI46_HUMAN	Tripartite motif-containing protein 46	IMAC	85248	7.99	23	23	4.6	4.6	56	56	0.04	56	1	1	3.5	1.31
TRPA1_HUMAN	Transient receptor potential cation channel subfamily A member 1	CM	129032	6.52	21	21	3.2	3.2	3	3	0.03	3	1	1	7.8	0.41
TRPM3_HUMAN	Transient receptor potential cation channel subfamily M member 3	CM	199239		15	15			7	7	0.02	7	1	1	1.5
TSN7_HUMAN	Tetraspanin-7	CM	28202	6.86	33	33	4.4	4.4	1	1	0.13	1	1	1	29.4	0.15
TSP1_HUMAN	Thrombospondin-1 precursor	CM	133375		36	36			6	6	0.03	6	1	1	9									6
TSSK4_HUMAN	Testis-specific serine/threonine-protein kinase 4	IMAC	37454	8.78	17	17	3	3	3	3		3	1	1	24	0.13																				3
TTC14_HUMAN	Tetratricopeptide repeat protein 14	CM	88831	8.77	14	14	1.3	1.3	2	2		2	1	1	11.3	0.12
TTC17_HUMAN	Tetratricopeptide repeat protein 17	CM	130755	6.11	22	22	2.4	2.4	3	3	0.03	3	1	1	7.6	0.32
TTC9A_HUMAN	Tetratricopeptide repeat protein 9A	CM	24695	9.13	16	16	3.2	3.2	1	1	0.15	1	1	1	40.5	0.08																															1
TTF2_HUMAN	Transcription termination factor 2	IMAC	130842	8.63	20	20	2.2	2.2	5	5	0.03	5	1	1	2.3	0.96
TTHY_HUMAN	Transthyretin precursor	CM / IMAC	16001	5.52	41	136	23.8143	53.1	6.8	22	1.34	68	36	26	87.5	0.61			2					22						5			8			3	7					4			6	2		4
TULP1_HUMAN	Tubby-related protein 1	CM	60878	9.5	14	14	10.5	10.5	4	4	0.06	4	1	1	7.4	1.42
TULP4_HUMAN	Tubby-related protein 4	IMAC	170826	7.67	22	22	0.7	0.7	3	3	0.02	3	1	1	5.3	0.13																													3
TUSC1_HUMAN	Tumor suppressor candidate gene 1 protein	CM	23219	11.08	17	17	9.6	9.6	4	4	0.16	4	1	1	43.1	0.22
TXD17_HUMAN	Thioredoxin domain-containing protein 17	CM / IMAC	14226	5.4	25	30	23.15	30.9	5	7	0.46	15	3	2	84.4	0.37																													7
TYPH_HUMAN	Thymidine phosphorylase precursor	IMAC	50354	5.36	41	41	8.5	8.5	3	3	0.07	3	1	1	6	1.42												3
TYW1_HUMAN	tRNA wybutosine-synthesizing protein 1 homolog	IMAC	84785		20	20			2	2	0.04	2	1	1	4.7																		2
TYW1B_HUMAN	tRNA wybutosine-synthesizing protein 1 homolog B	IMAC	77885		20	20			2	2	0.05	2	1	1	5.1																		2
UBF1_HUMAN	Nucleolar transcription factor 1	IMAC	89406	5.63	17	17	3.1	3.1	5	5		5	1	1	10.1	0.31																				5
UBIQ_HUMAN	Ubiquitin	CM / IMAC	8565	6.56	61	247	58.9917	97.4	16.2	42	12.02	357	54	33	140.1	0.7	1	3	16				2					28	2	2	3			18	2	30	3		3			5	3	2			37	42	4
UBN1_HUMAN	Ubinuclein	IMAC	122089	9.37	15	15	3.1	3.1	12	12	0.03	12	1	1	7.4	0.42																				12
UBP14_HUMAN	Ubiquitin carboxyl-terminal hydrolase 14	CM	56525		15	15			4	4	0.07	4	1	1	21.2															4
UBP36_HUMAN	Ubiquitin carboxyl-terminal hydrolase 36	CM	123962	9.71	17	17	2.4	2.4	2	2	0.03	2	1	1	3.6	0.67												2
UBP5_HUMAN	Ubiquitin carboxyl-terminal hydrolase 5	CM / IMAC	96698	4.91	18	21	2.73333	6.1	4.3	6	0.04	13	4	4	14.5	0.42																				3												6
UBP51_HUMAN	Ubiquitin carboxyl-terminal hydrolase 51	CM	79756	8.73	19	19	6.2	6.2	3	3		3	1	1	10.4	0.6
UBS3B_HUMAN	Ubiquitin associated and SH3 domain-containing protein B	CM	73836	6.48	24	24	2.5	2.5	5	5	0.05	5	1	1	13.5	0.19
UCKL1_HUMAN	Uridine/cytidine kinase-like 1	IMAC	61540		15	15			3	3	0.06	3	1	1	6.5
UK114_HUMAN	Ribonuclease UK114	CM / IMAC	14551	8.74	27	32	19	19	2.5	3	0.27	5	2	2	61.9	0.31													3								2
UN45B_HUMAN	UNC45 homolog B	CM	105044	8.03	14	14	3.5	3.5	2	2	0.04	2	1	1	4.3	0.81												2
UN84A_HUMAN	Protein unc-84 homolog A	CM / IMAC	90862	6.61	26	25	1.5	1.5	3	4	0.04	6	2	2	15.4	0.1
UPAR_HUMAN	Urokinase plasminogen activator surface receptor precursor	CM	38632		25	25			1	1	0.1	1	1	1	31.1																		1
UPK2_HUMAN	Uroplakin-2 precursor	IMAC	19552	10.41	28	28	20.7	20.7	4	4	0.2	4	1	1	46	0.45																													4
UROK_HUMAN	Urokinase-type plasminogen activator precursor	CM / IMAC	49951	8.78	21	21	6.5	6.5	2.5	4	0.07	5	2	2	24	0.27																												4
UROM_HUMAN	Uromodulin precursor	CM / IMAC	72499	5.05	87	265	9.18158	15.9	12.1	27	0.23	217	67	42	20.7	0.77	6		25	6			3	6				8	8	4	7	10	16	6	3	15	9			4	7			5	8	3	14	4	3
UTER_HUMAN	Uteroglobin precursor	CM	10222	4.99	30	39	20.5333	29.7	8	16	1.01	40	7	5	117.4	0.25																	5														16	7
UTF1_HUMAN	Undifferentiated embryonic cell transcription factor 1	CM	36666	10.9	32	32	12.6	12.6	2	2	0.1	2	1	1	27.3	0.46			2
VAPA_HUMAN	Vesicle-associated membrane protein-associated protein A	CM / IMAC	28121	8.8	25	32	10.34	18.9	2.5	4	0.13	10	21	20	49.8	0.38				2	2		1				2	1								2						3		4			1	2
VASN_HUMAN	Vasorin precursor	CM	72796	7.16	24	40	5.3375	9.4	4.8	9	0.1	38	15	11	13.7	0.69			3												1					2										1		2
VATE1_HUMAN	Vacuolar proton pump subunit E 1	CM	26202		20	20			1	1	0.15	1	1	1	31.7																																1
VCAM1_HUMAN	Vascular cell adhesion protein 1 precursor	CM	82359	5.14	27	32	7.13333	10.6	5.3	8	0.07	16	3	1	12.1	0.88																															8
VIGLN_HUMAN	Vigilin	CM	141456	6.43	19	19	1.9	1.9	3	3		3	1	1	5.9	0.32
VIME_HUMAN	Vimentin	IMAC	53708	5.06	44	44	4.5	4.5	2	2	0.07	2	1	1	5.6	0.8												2
VMO1_HUMAN	Vitelline membrane outer layer protein 1 homolog precursor	CM / IMAC	22047	4.9	38	101	21.375	35.6	5.6	10	0.39	45	30	20	54.4	0.65			8					6				3	7					3		2								2			4	6
VP13A_HUMAN	Vacuolar protein sorting-associated protein 13A	CM	360276	5.94	19	19	1.9	1.9	7	7		7	1	1	2.3	0.83
VP13D_HUMAN	Vacuolar protein sorting-associated protein 13D	CM	495604	6.15	14	14	2.9	2.9	9	9	0.01	9	1	1	1.7	1.71
VPP1_HUMAN	Vacuolar proton translocating ATPase 116 kDa subunit a isoform 1	IMAC	97210	6.02	17	17	3.7	3.7	4	4	0.04	4	1	1	9.3	0.4																				4
VSIG4_HUMAN	V-set and immunoglobulin domain-containing protein 4 precursor	CM / IMAC	44557	5.93	31	37	4.26667	6	1.5	2	0.08	3	4	4	33.7	0.18																	2	2			2
VSIG8_HUMAN	V-set and immunoglobulin domain-containing protein 8 precursor	IMAC	44974	6.84	18	18	3.1	3.1	1	1	0.08	1	1	1	20	0.16																					1
VTNC_HUMAN	Vitronectin precursor	CM / IMAC	55104	5.55	21	22	5.4	5.4	2.5	3	0.07	5	3	3	21.8	0.25																	3												2
WD42A_HUMAN	WD repeat-containing protein 42A	CM / IMAC	67536	5.21	30	33	4.6	5.7	4	4	0.06	4	3	3	9.6	0.59													4			4
WDR1_HUMAN	WD repeat-containing protein 1	CM	66877	6.17	30	34	4.7	6.8	2.5	4	0.06	5	2	1	15	0.45																															4
WDR19_HUMAN	WD repeat-containing protein 19	CM	153519	5.94	22	22	5.4	5.4	6	6	0.02	6	1	1	6.5	0.83
WDR27_HUMAN	WD repeat-containing protein 27	IMAC	92061		16	16			4	4	0.04	4	1	1	4.3
WDR38_HUMAN	WD repeat-containing protein 38	CM	34939	8.89	21	21	1.9	1.9	1	1	0.11	1	1	1	15.7	0.12
WEE1B_HUMAN	Wee1-like protein kinase 1B	IMAC	63317	6.03	23	23	5.3	5.3	7	7	0.06	7	1	1	4.7	1.13												7
WNT7A_HUMAN	Protein Wnt-7a precursor	IMAC	40431	9.05	15	15	4.6	4.6	11	11	0.09	11	1	1	22.3	0.21																					11
YTHD3_HUMAN	YTH domain family protein 3	CM	63975	9.07	25	25	2.7	2.7	1	1	0.06	1	1	1	10.2	0.26																											1
Z512B_HUMAN	Zinc finger protein 512B	CM	98803		15	15			12	12	0.04	12	1	1	12.1															12
ZA2G_HUMAN	Zinc-alpha-2-glycoprotein precursor	CM / IMAC	34100	5.57	44	100	20.8333	39.3	9.9	37	0.54	148	49	32	44	0.89			17					2				4	5	4	7		37	17		4	8			1			2	1		4	9	3
ZC3H8_HUMAN	Zinc finger CCCH domain-containing protein 8	CM	34260	8.55	17	17	2.7	2.7	1	1	0.11	1	1	1	24.2	0.11												1
ZCH18_HUMAN	Zinc finger CCCH domain-containing protein 18	IMAC	106586		30	30			11	11	0.03	11	1	1	3.8																			11
ZCHC4_HUMAN	Zinc finger CCHC domain-containing protein 4	CM	60664	9.06	30	30	3.3	3.3	3	3		3	1	1	10.7	0.31													3
ZDHC6_HUMAN	Probable palmitoyltransferase ZDHHC6	CM / IMAC	48746	8.81	15	16	9.2	9.2	2	2	0.08	2	2	2	24.6	0.37																					2
ZFP3_HUMAN	Zinc finger protein 3 homolog	IMAC	59316	6.99	18	18	2	2	1	1	0.06	1	1	1	15.2	0.13																												1
ZN154_HUMAN	Zinc finger protein 154	CM	49865		31	31	2.8	2.8	5	5		5	1	1	14	0.2
ZN277_HUMAN	Zinc finger protein 277	IMAC	52642	5.1	16	16	4.6	4.6	2	2	0.07	2	1	1	5.7	0.81
ZN287_HUMAN	Zinc finger protein 287	IMAC	89504	8.8	16	16	6.8	6.8	6	6	0.04	6	1	1	10.1	0.67																					6
ZN334_HUMAN	Zinc finger protein 334	CM	81987	9.33	18	18	1.9	1.9	1	1	0.05	1	1	1	10.1	0.19												1
ZN364_HUMAN	Zinc finger protein 364	CM	34273	5.39	14	14	6.2	6.2	1	1	0.11	1	1	1	19	0.33													1
ZN407_HUMAN	Zinc finger protein 407	CM	251815	6.05	22	22	2.25	3.6	7.5	10	0.01	15	2	2	2.6	1.38
ZN432_HUMAN	Zinc finger protein 432	IMAC	76889	9.04	13	13	2	2	1	1	0.05	1	1	1	5.2	0.38
ZN500_HUMAN	Zinc finger protein 500	IMAC	54587	6.84	23	23	4	4	2	2	0.07	2	1	1	16.5	0.24																		2
ZN551_HUMAN	Zinc finger protein 551	IMAC	77515	8.73	14	14	4.5	4.5	2	2		2	1	1	3.9	1.15											2
ZN598_HUMAN	Zinc finger protein 598	IMAC	100462	8.75	15	15	2.7	2.7	3	3	0.04	3	1	1	9	0.3																													3
ZN608_HUMAN	Zinc finger protein 608	CM	163246		15	15			8	8	0.02	8	1	1	1.8
ZN627_HUMAN	Zinc finger protein 627	IMAC	54507		16	16			2	2	0.07	2	1	1	7.3		2
ZN644_HUMAN	Zinc finger protein 644	CM	151446	8.43	20	20	6.2	6.2	5	5	0.02	5	1	1	4.6	1.35
ZN681_HUMAN	Zinc finger protein 681	CM	68674	9.34	18	18	3.5	3.5	3	3	0.05	3	1	1	14.6	0.24
ZN793_HUMAN	Zinc finger protein 793	CM	44333	9.45	15	15	3.5	3.5	2	2	0.08	2	1	1	18.7	0.19
ZNF44_HUMAN	Zinc finger protein 44	IMAC	76524	9.05	27	27	3.4	3.4	11	11		11	1	1	3.9	0.87									11
ZO1_HUMAN	Tight junction protein ZO-1	CM / IMAC	195799	6.24	22	25	6.5	6.5	18.5	26	0.02	37	2	2	6.1	1.07								11				26
ZSC10_HUMAN	Zinc finger and SCAN domain-containing protein 10	IMAC	82554		21	21			1	1	0.04	1	1	1	4.8
ZWINT_HUMAN	ZW10 interactor	IMAC	31350	5.1	16	16	6.1	6.1	5	5		5	1	1	44.7	0.14
[truncated: 29 more columns]
